# Supplementary material
Source: publisher site journal article supplement (https://www.dovepress.com/get_supplementary_file.php?f=408677.xlsx)
Supplement: Supplementary file 1 [file get_supplementary_file.php]

## Sheet: Supplementary file 1
Supplementary Table 1. original data
id	PA	age	gender	ethnicity	marital status	residence	occupation	education	income	smoking	alcohol use	exercise	BMI	new cases	other chronic disease	disease classification	disease duration	take medicine	complications	FBP	Crea	PA1	sitting	sitting X exercise	TG	TC	HDL	LDL	HBa1c	Urea	TG	TC	HDL	LDL	blood lipids	hba1c	agegroup
1001031251	2	44	0	1	1	1	0	3	4	0	0	0	3	0	0	1	6	1	1	6.76	40	1	1	2	1.12	3.81	1.16	2.34	8.5	3.17	0	0	0	0	0	1	1
1001081231	4	66	1	1	1	1	0	3	4	0	0	1	1	0	0	1	4	1	0	9.81	58.3	1	6	24	2.78	5.58	1.15	4.26	11.5	6.5	1	1	0	1	1	1	3
1001081232	1	55	1	1	1	1	0	4	4	1	1	0	2	0	1	1	6	0	0	10.48	60.6	0	4	4	19.94	5.96	0.75	3.03	10	5.95	1	1	1	0	1	1	2
1001081233	3	50	1	1	1	0	0	3	3	0	1	0	2	0	0	1	5	1	1	9.81	58.3	0	6	18	1.54	3.91	1.08	2.73	9.3	6.5	0	0	0	0	0	1	2
1001091231	4	60	0	1	1	1	0	3	3	1	1	0	3	0	0	3	10	1	0	18.35	47.8	1	5	20	1.73	3.9	1.04	2.65	10.2	4.89	1	0	0	0	1	1	3
1001091232	3	49	1	1	1	1	0	4	5	1	0	0	3	0	1	1	5	1	1	8.15	73.5	0	4	12	0.84	4.41	1.4	2.83	7.5	4.73	0	0	0	0	0	1	2
1001101251	3	57	1	1	1	1	0	4	5	0	1	0	2	0	0	3	5	1	0	20.76	78.4	0	4	12	3.32	4.42	1.17	3.05	11.7	5.35	1	0	0	0	1	1	2
1001131231	3	69	1	1	1	1	0	4	4	1	1	0	2	0	1	1	8	1	1	7.03	62.9	0	5	15	1.48	6.01	1.42	4.35	7.5	4.93	0	1	0	1	1	1	3
1001141231	1	35	1	1	1	1	0	3	4	0	1	0	1	1	0	3	0	1	0	17.88	42.8	1	2	2	1.59	4.46	1.21	3.06	15.3	7.67	0	0	0	0	0	1	1
1001161211	1	47	1	0	1	1	1	3	1	1	1	0	2	0	1	1	9	1	1	10.47	49.9	1	9	9	14.64	5.78	1.48	3.6	10.6	4.4	1	1	0	1	1	1	2
1001171231	1	69	1	1	0	1	0	2	3	1	1	0	2	0	0	2	12	1	1	13.05	87.9	0	6	6	5.26	5.57	1.35	3.57	7.6	5.27	1	1	0	1	1	1	3
1001201231	1	67	0	0	1	0	1	2	1	0	0	0	3	0	1	1	12	1	1	7.69	51.6	0	7	7	0.62	3.2	1.27	1.76	8.2	2.26	0	0	0	0	0	1	3
1001201232	4	74	0	1	1	1	1	1	1	0	0	1	3	0	0	1	3	1	1	5.36	56.2	1	3	12	0.9	2.97	1.26	1.54	6	3.21	0	0	0	0	0	0	3
1001201233	1	63	1	1	1	1	0	3	3	0	1	0	2	0	1	1	1	1	0	8.26	80.3	0	5	5	1.7	4.28	1.32	2.89	6.2	5.79	1	0	0	0	1	0	3
1006241231	1	38	1	1	1	1	1	4	4	1	0	0	3	1	1	2	0	0	0	13.65	57.8	0	7	7	11.7	4.9	0.9	2.8	10.7	3.7	1	0	1	0	1	1	1
1006241232	4	66	0	1	1	1	0	3	5	0	0	1	3	0	1	1	0	1	0	5.84	49.4	0	5	20	2.9	4.99	1.11	3.6	7.2	5.56	1	0	0	1	1	1	3
1006241233	4	63	0	0	1	1	0	2	3	0	0	0	3	0	1	1	1	1	0	6.03	53.1	1	5	20	1.66	3.66	1.16	2.26	6.9	4.25	0	0	0	0	0	0	3
1006251233	4	78	0	1	1	1	0	3	4	0	0	1	2	0	1	1	10	0	1	5.67	44.5	1	6	24	0.39	3.52	0.93	2.26	5.7	5.35	0	0	1	0	1	0	3
1006281251	2	69	1	1	1	1	0	3	5	1	1	0	2	0	0	1	4	1	1	5.53	65.7	1	2	4	1.46	4.19	1.02	2.94	6.7	8.04	0	0	1	0	1	0	3
1007011231	1	78	0	1	0	1	0	1	4	0	0	0	2	0	1	2	2	1	1	14.84	267.3	0	8	8	2.31	3.48	0.7	2.54	7.7	9.9	1	0	1	0	1	1	3
1007011232	2	57	1	1	0	1	0	4	4	0	0	0	1	0	1	2	20	1	1	12.9	58.9	1	7	14	1.51	3	0.84	1.91	9.2	6.48	0	0	1	0	1	1	2
1007011251	1	75	0	1	1	0	0	3	5	1	0	1	2	0	1	3	25	0	1	24.39	167.3	0	5	5	0.95	1.52	0.63	0.82	11	9.9	0	0	1	0	1	1	3
1007041211	4	66	1	1	1	1	0	4	3	1	1	0	2	0	1	1	8	1	1	6.3	71.8	1	5	20	0.91	3.32	0.91	2.11	5.7	5.28	0	0	1	0	1	0	3
1007041212	4	66	1	1	1	1	0	4	4	1	1	0	1	0	1	2	14	1	1	15.63	70.9	1	3	12	0.89	3.85	1.05	2.4	10.7	5.34	0	0	0	0	0	1	3
1007041213	4	60	1	1	1	1	1	2	3	1	1	0	1	1	1	1	0	1	1	10.13	52.9	1	4	16	1.77	5.38	1.43	3.63	6.6	8.84	1	1	0	1	1	0	3
1007061211	4	70	0	0	0	1	1	3	3	0	0	1	2	1	1	3	11	1	1	17.02	449.9	1	3	12	0.76	3.98	1.02	2.56	11.1	3.97	0	0	1	0	1	1	3
1007061231	1	66	1	1	1	1	0	4	4	1	0	0	1	0	1	1	13	1	1	8.28	59.9	0	6	6	1.83	5.61	1.05	4.22	11	4.63	1	1	0	1	1	1	3
1007071231	4	54	0	1	1	1	0	3	5	0	0	1	1	1	1	1	0	1	0	8.5	54.6	1	4	16	3.58	6.27	1.48	4.26	7.8	8.18	1	1	0	1	1	1	2
1007091231	3	51	1	1	1	1	0	4	4	0	0	0	3	0	0	1	7	1	1	8.04	55.6	0	6	18	0.85	4.24	0.89	3.03	10.8	7.26	0	0	1	0	1	1	2
1007101231	4	55	0	1	1	1	0	4	5	0	0	1	1	0	1	1	12	1	1	4.36	48.6	1	2	8	2.24	4.54	1.03	3.06	5.7	5.46	1	0	1	0	1	0	2
1007101232	4	77	0	1	1	1	0	2	4	0	0	0	3	0	1	3	26	1	1	23.5	77.2	0	5	20	0.84	3.52	0.96	2.19	9.7	6.91	0	0	1	0	1	1	3
1007101233	1	54	1	1	1	1	0	4	4	1	1	0	2	1	0	1	0	1	0	9.19	63.4	0	5	5	3.45	5.01	1.02	3.69	7.3	5.93	1	0	1	1	1	1	2
1007121251	3	66	1	1	1	1	1	3	4	0	1	0	2	0	1	1	11	1	1	9.23	71.1	1	6	18	1.27	3.57	0.94	2.29	9.5	4.81	0	0	1	0	1	1	3
1007131251	3	53	0	1	1	1	0	4	5	0	0	0	2	1	0	1	0	1	0	10.6736	67.6153	0	7	21	2.8	2.77	0.94	2.29	9.1	5.77802	1	0	1	0	1	1	2
1007141231	3	47	1	1	1	1	0	4	5	1	1	0	1	1	1	3	0	0	0	17.75	51.9	0	6	18	15.58	8.94	1.77	5.61	13.2	9.22	1	1	1	1	1	1	2
1007151211	1	49	1	1	1	0	0	3	3	1	0	0	2	1	1	2	1	0	0	13.42	68.3	0	2	2	1.54	4.21	0.83	2.66	12.8	8.94	0	0	1	0	1	1	2
1007151221	4	77	0	1	0	1	0	1	2	0	0	1	3	0	1	1	18	1	1	10.6	46.8	1	3	12	1.32	4.91	1.25	2.9	7.7	2.41	0	0	0	0	0	1	3
1007151231	4	67	0	1	1	0	1	1	2	0	0	0	3	0	1	1	11	0	1	4.14	57.1	1	3	12	2.31	3.19	0.88	1.73	6.7	4.29	1	0	1	0	1	0	3
1007161231	4	72	1	1	1	1	0	3	5	1	0	1	1	0	1	2	26	1	0	11.39	76.2	0	6	24	0.89	3.2	0.71	2.3	7	8.73	0	0	1	0	1	1	3
1007161232	4	61	0	1	1	1	1	2	3	0	0	1	1	0	0	1	17	1	0	5.69	67.1	1	5	20	0.57	3.3	0.84	2.15	7.9	6.54	0	0	1	0	1	1	3
1007161233	4	43	1	1	1	1	0	3	5	1	1	0	3	0	1	2	10	1	1	12.45	70.9	1	4	16	12.37	4.91	1.05	3.24	9.4	5.05	1	0	0	0	1	1	1
1007161234	4	62	0	1	1	0	1	1	3	0	0	1	2	0	1	1	4	1	1	5.48	45.6	1	5	20	5.86	5.58	1.32	3.78	6.4	3.16	1	1	0	1	1	0	3
1007171231	4	69	1	1	1	1	0	3	2	1	1	0	3	0	1	1	22	1	1	10.15	109.3	1	5	20	3.15	3.67	0.84	2.01	9.08664	7.99	1	0	1	0	1	1	3
1007191211	3	49	1	1	1	1	0	3	4	1	1	0	1	0	1	1	10	0	0	9.96	44.3	0	5	15	2.68	3.72	1.36	2.15	7.5	3.6	1	0	0	0	1	1	2
1007201222	4	51	0	0	1	1	0	2	4	0	0	0	2	0	0	1	9	1	1	10.33	44.6	1	7	28	2.16	4.29	0.87	3.27	7.1	4.48	1	0	1	0	1	1	2
1007201251	1	39	1	0	1	1	0	4	5	1	1	0	2	0	0	2	3	0	1	12.74	58.6	0	4	4	2.04	4.21	0.92	3.02	10.4	7.18	1	0	1	0	1	1	1
1007201661	1	70	0	1	1	1	0	3	4	0	0	0	1	0	1	1	22	1	1	7.45	52.9	1	4	4	2.19	3.14	0.78	2.04	7.3	5.24	1	0	1	0	1	1	3
1007211251	3	36	1	0	1	1	0	4	5	1	0	0	1	0	0	1	12	0	1	7.27	73.9	1	8	24	0.79	3.8	1	2.25	9.7	7.75	0	0	1	0	1	1	1
1007231211	4	58	0	1	1	1	0	3	4	0	0	0	1	0	1	1	8	0	1	5.64	65.9	1	4	16	2.3	5.7	1.33	4.21	6.9	5.63	1	1	0	1	1	0	2
1007261221	4	40	1	1	1	1	0	4	5	1	0	0	2	1	1	1	0	1	0	9.61	71.6	1	4	16	2.77	4.89	1.14	3.52	8.6	3.81	1	0	0	1	1	1	1
1007261222	4	53	1	1	1	1	0	3	4	0	1	0	2	0	1	1	7	1	0	5.68	63.9	1	3	12	1.05	3.51	1.03	2.37	7.1	5.89	0	0	1	0	1	1	2
1007261223	4	76	1	1	1	1	0	4	4	1	0	0	2	0	1	1	25	1	1	7.39	77.4	1	5	20	1.18	4.27	0.95	3.19	6.8	6.32	0	0	1	0	1	0	3
1007271231	3	58	1	1	1	1	0	3	5	0	1	0	2	0	1	2	5	1	0	14.21	52.6	0	7	21	0.79	4.04	0.91	2.92	6.6	5.59	0	0	1	0	1	0	2
1007271232	3	66	1	0	1	1	1	2	2	1	0	1	1	0	1	3	10	1	1	17.65	55.1	0	6	18	1.19	3.85	0.89	2.86	15.6	2.28	0	0	1	0	1	1	3
1007271251	2	66	1	1	1	1	0	3	5	1	0	0	2	0	1	1	4	1	1	5.32	82.2	1	4	8	2.78	3.76	1.01	2.57	6	4.89	1	0	1	0	1	0	3
1007271661	4	50	0	1	1	1	0	4	5	0	0	0	2	1	1	3	0	1	0	16.65	60.1	1	10	40	2.17	4.7	1	3.35	12.1	5.35	1	0	1	0	1	1	2
1007281231	4	65	1	1	1	1	0	4	4	0	1	0	1	0	1	1	10	1	1	10.08	54.1	1	5	20	3.06	2.46	0.99	1.01	8.7	3.27	1	0	1	0	1	1	3
1007281661	#NULL!	53	1	1	1	1	0	3	5	1	1	0	2	1	1	1	0	1	0	6.74	91.5	1	10	#NULL!	1.72	3.92	1.04	2.49	6.3	4.26	1	0	0	0	1	0	2
1007281662	4	69	1	0	1	1	0	2	5	1	0	1	1	0	0	1	8	0	1	8.71	63.1	0	6	24	0.7	3.42	1.16	1.99	7.3	4.93	0	0	0	0	0	1	3
1007291231	4	60	1	0	1	1	1	2	2	0	0	1	1	0	1	3	7	1	1	21.17	65.6	1	4	16	1.28	2.89	0.56	2.1	14.1	3.89	0	0	1	0	1	1	3
1007291232	4	52	0	0	1	0	1	1	2	0	0	0	1	0	0	2	10	1	1	12.04	38.8	1	4	16	1.17	3.81	0.93	2.29	9.1	5.03	0	0	1	0	1	1	2
1007291233	4	62	0	1	1	1	0	3	4	0	0	1	2	0	1	1	13	1	1	10.47	36.1	1	5	20	2.73	4.22	1.08	2.85	7.4	6.81	1	0	0	0	1	1	3
1008031251	4	60	1	1	1	1	0	4	5	0	0	0	3	0	1	3	6	1	1	20.07	77.7	0	3	12	3.33	4.74	1.02	3.44	7	5.81	1	0	1	1	1	1	3
1008031661	4	66	1	0	1	0	0	3	2	0	0	0	3	1	1	3	0	1	0	39.39	78.4	1	4.84314	19.3725	1.14	1.56	0.69	1.66	12.6	7.93	0	0	1	0	1	1	3
1008051251	4	49	1	0	1	1	0	4	5	1	0	0	1	0	1	1	13	0	1	6.22	357	1	8	32	1.09	3.41	0.7	2.31	8.5	9.9	0	0	1	0	1	1	2
1008071231	3	53	1	1	1	1	0	3	5	1	1	0	1	1	0	1	0	0	0	3.9	109.7	0	6	18	0.56	3.54	1.29	1.61	6.4	8	0	0	0	0	0	0	2
1008071232	4	58	0	0	0	1	0	4	4	0	0	0	1	0	1	1	1	0	0	5.4	66.4	1	4	16	6.02	4.43	1	2.7	6.7	5.03	1	0	1	0	1	0	2
1008071661	4	70	0	1	1	1	0	3	4	0	0	1	1	0	0	1	4	1	1	7.44	47.1	0	5	20	1.21	5.76	1.39	3.58	8	5.89	0	1	0	1	1	1	3
1008101231	4	57	0	1	1	0	1	2	2	0	0	1	1	0	1	1	17	1	1	4.59	49.9	1	4	16	1.47	5.71	1.2	3.79	6.6	5.37	0	1	0	1	1	0	2
1008111661	4	73	0	1	0	1	0	2	4	0	0	1	3	0	1	1	17	1	1	5.84	94.4	1	15	60	2.21	3.15	0.8	1.98	6.7	9.65	1	0	1	0	1	0	3
1008131231	4	61	1	1	1	1	0	4	4	0	1	1	1	0	1	1	4	1	1	5.37	61.6	1	4	16	1.48	4.05	0.81	2.85	6.5	3.61	0	0	1	0	1	0	3
1008131232	4	70	1	1	1	1	0	3	5	1	0	0	2	0	1	1	3	1	1	3.96	59.1	1	6	24	1.34	4.63	0.72	3.37	8	4.08	0	0	1	1	1	1	3
1008131661	4	70	1	0	1	1	0	3	3	1	0	1	1	0	0	1	12	0	1	7.86	67.9	1	15	60	0.65	5.53	1.35	3.4	10.4	9.5	0	1	0	1	1	1	3
1008161231	4	73	0	1	0	1	0	2	1	0	0	0	1	0	1	2	16	1	1	11.92	70.2	1	2	8	1.34	3	1.17	2.04	9.2	7.85	0	0	0	0	0	1	3
1008171231	4	63	0	1	1	1	0	4	5	0	0	0	1	0	0	1	13	1	1	4.8	39.3	1	4	16	2.14	5.52	1.14	3.76	8	2.54	1	1	0	1	1	1	3
1008181231	4	67	1	0	1	1	0	2	4	0	0	0	1	0	0	1	27	1	1	5.87	60.9	1	4	16	0.7	4.17	1.28	2.18	7.1	3.17	0	0	0	0	0	1	3
1008181232	4	78	0	0	1	1	0	2	3	0	0	1	2	0	1	3	1	1	1	33.39	59.9	1	5	20	1.31	4.85	0.9	3.26	13.2	6.34	0	0	1	0	1	1	3
1008191231	3	49	1	1	0	1	0	1	3	0	0	0	1	0	0	2	5	1	1	15.48	62.1	0	6	18	0.63	3.16	0.97	1.66	8.6	5.92	0	0	1	0	1	1	2
1008191239	4	71	0	1	0	1	0	3	4	0	0	0	1	0	1	2	32	1	1	12.75	51.7	1	2	8	1.26	5.96	1.6	4.04	10.1	5	0	1	1	1	1	1	3
1008191661	4	45	0	0	1	1	0	2	4	0	0	0	2	0	0	1	0	1	0	5.82	62.4	1	10	40	2.04	3.23	0.78	1.96	5.6	3.84	1	0	1	0	1	0	2
1008201231	4	55	1	1	1	1	0	4	5	0	0	0	2	0	0	2	5	1	1	12.55	85.9	0	4	16	2.43	4.84	0.97	3.42	8.9	8.03	1	0	1	1	1	1	2
1008201232	4	62	1	1	1	0	0	2	2	1	1	0	3	0	1	1	7	1	1	6.07	78.2	0	4	16	2.2	4.15	0.76	2.83	6.9	4.8	1	0	1	0	1	0	3
1008211211	3	66	0	1	1	1	0	2	2	0	0	1	1	1	1	1	0	1	0	6.29	36.3	0	2	6	0.99	3.1	1.15	1.39	6.9	3.61	0	0	0	0	0	0	3
1008211231	4	67	1	1	1	1	0	3	3	0	0	0	2	0	1	3	23	0	1	23.54	62.6	1	4	16	1.18	3.68	0.9	2.2	15.4	5.01	0	0	1	0	1	1	3
1008211232	4	39	0	0	1	1	0	4	3	0	0	0	2	0	0	1	3	1	1	6.9	32.1	1	5	20	2.09	3.71	0.99	2.26	7.4	4.94	1	0	1	0	1	1	1
1008241231	3	59	1	1	1	1	0	4	4	1	1	0	2	0	1	1	16	1	1	10.32	69.9	1	7	21	1.21	4.03	1.19	2.25	9.4	5.43	0	0	0	0	0	1	2
1008251231	4	49	1	0	1	1	0	4	4	1	0	0	3	0	1	1	5	1	1	9.33	61.4	1	3	12	2.41	3.52	0.86	2.18	9	5.11	1	0	1	0	1	1	2
1008251661	4	75	0	1	1	1	0	2	4	0	0	1	1	1	1	1	0	1	0	6.83	47.1	1	14	56	0.69	3.58	1.02	2.01	11	5.39	0	0	1	0	1	1	3
1008261231	4	48	1	0	1	1	0	4	4	1	0	0	2	0	1	1	10	1	1	6.57	55.4	1	6	24	1.4	4.3	0.81	2.95	10.3	6.17	0	0	1	0	1	1	2
1008261232	4	72	0	1	0	1	0	3	4	0	0	1	1	0	1	3	12	1	1	17.93	77.4	1	5	20	0.57	3.62	0.94	1.94	9	9.9	0	0	1	0	1	1	3
1008281661	4	57	1	1	1	1	0	4	4	1	0	0	2	0	1	1	7	1	1	9.05	67.4	1	4.84314	19.3725	1.31	3.54	0.88	1.31	7.2	7.03	0	0	1	0	1	1	2
1009031231	1	47	1	1	1	0	1	2	3	1	0	1	1	0	1	3	18	0	0	22.71	88.7	1	1	1	2.12	4.35	1.68	2.69	9.08664	12.6	1	0	1	0	1	1	2
1009031232	3	43	1	1	1	1	0	4	4	0	0	0	3	0	1	1	5	1	1	8.87	64.3	1	5	15	5.26	5.86	0.93	3.77	8.9	4.67	1	1	1	1	1	1	1
1009031233	4	55	1	1	1	1	0	4	5	1	1	0	2	0	1	1	3	1	1	10.9	69.8	1	5	20	4	4.46	0.89	2.76	7.4	5.74	1	0	1	0	1	1	2
1009041251	3	68	0	1	0	0	0	3	5	0	0	1	2	0	0	1	14	0	1	10.25	73.8	1	3	9	2.86	4.49	0.86	2.89	7.6	6.41	1	0	1	0	1	1	3
1009061231	3	48	1	1	1	1	0	3	4	1	0	0	3	0	1	1	5	1	0	5.84	105.3	1	7	21	2.87	3.93	0.7	2.58	5.3	4.52	1	0	1	0	1	0	2
1009061251	3	61	0	1	0	0	1	2	5	0	0	1	1	0	1	3	10	0	0	16.8	29.6	0	2	6	2	4.4	0.87	3.04	9.2	3.43	1	0	1	0	1	1	3
1009071211	1	54	0	1	1	0	0	2	3	0	0	0	2	0	1	1	6	1	1	7.12	45.1	0	5	5	5.14	4.61	1.19	2.74	7.7	3.42	1	0	0	0	1	1	2
1009091231	1	69	0	0	1	1	0	2	2	0	0	0	2	0	1	3	19	1	1	20.3	60.2	0	5	5	0.81	3.2	1.23	2.02	11	4.82	0	0	0	0	0	1	3
1009091251	3	61	1	1	1	0	0	3	5	1	0	0	1	0	1	1	15	1	0	8.4	99.5	1	2	6	2.7	4.56	1.03	3.16	7.6	8.04	1	0	1	0	1	1	3
1009101211	1	62	1	1	1	1	0	4	4	0	0	1	2	0	0	2	6	1	1	11.97	81.4	1	4	4	1.43	5.41	1.08	3.67	11.1	4.37	0	1	0	1	1	1	3
1009171251	3	74	0	0	1	1	0	4	5	0	0	1	2	1	1	1	1	1	0	8.31	51.9	0	5	15	1.67	3.86	1.37	2.55	9.08664	3.43	0	0	0	0	0	1	3
1009171252	4	51	1	0	1	1	0	4	5	0	0	0	2	1	0	1	1	1	0	8.03	68.9	1	4	16	3.43	5.29	1.02	3.62	9.6	8.17	1	1	1	1	1	1	2
1009171253	2	71	0	1	1	1	0	4	5	0	0	1	3	0	1	1	11	1	1	7.26	33	1	4	8	0.97	3	1.22	1.88	6.67	2.89	0	0	0	0	0	0	3
1009201231	1	40	1	1	0	1	1	3	2	1	1	0	3	1	1	2	1	1	0	12.3	73.8	0	4	4	2.61	4.33	1.01	2.4	6.38	4.61	1	0	1	0	1	0	1
1009201232	4	68	0	1	1	1	0	4	4	0	0	0	1	0	0	2	12	0	1	14.43	81	1	3	12	4.04	5.59	1.34	3.6	8.52	6.65	1	1	0	1	1	1	3
1009201233	3	67	1	0	1	1	0	4	5	0	1	0	3	0	1	1	20	1	1	8.03	89	1	5	15	3.48	3.74	0.85	2.28	7.46	4.14	1	0	1	0	1	1	3
1009211234	1	41	1	0	1	1	0	4	4	1	1	0	1	0	1	2	13	1	1	14.81	67.5	0	5	5	2.78	5.9	1.09	4.02	9.09	4.23	1	1	0	1	1	1	1
1009231211	1	66	1	1	1	1	0	2	4	0	0	1	2	0	0	1	2	1	1	5.14	59.4	1	7	7	0.76	3.59	0.86	2.38	12.2	4.94	0	0	1	0	1	1	3
1009231219	1	47	1	1	1	1	0	4	4	1	1	0	3	0	1	2	17	1	1	12.23	79.4	1	6	6	1.23	2.44	0.75	1.39	10	5.59	0	0	1	0	1	1	2
1009231241	1	45	1	1	1	1	0	4	5	1	1	0	2	0	0	2	17	1	1	15.16	54.6	1	1	1	4.89	4.35	0.88	2.79	7.3	5.5	1	0	1	0	1	1	2
1009241211	4	67	0	1	1	1	0	3	4	0	0	1	2	0	1	1	15	1	1	5.97	57.6	1	5	20	0.71	3.76	1.28	2.02	7.6	4.76	0	0	0	0	0	1	3
1009241231	1	54	0	1	1	1	0	4	4	0	0	1	1	0	1	1	3	0	1	10.7	56.7	1	1	1	0.43	4.11	1.85	2.61	9.45	7.18	0	0	1	0	1	1	2
1009241232	1	55	1	0	1	1	0	4	5	0	1	0	1	0	0	3	3	0	1	17.74	53.1	0	3	3	0.92	4.86	1.3	3.48	11.87	6.47	0	0	0	1	1	1	2
1009241251	4	73	1	1	1	1	0	4	4	0	0	1	3	0	1	1	14	1	1	10.1	82.8	1	1	4	2.04	5.18	1.34	3.57	7.1	5.72	1	1	0	1	1	1	3
1009251231	1	40	1	1	0	1	0	4	4	1	1	0	3	0	0	1	4	1	0	8.18	92.2	0	4	4	1.82	4.39	0.86	3.19	6.13	4.03	1	0	1	0	1	0	1
1009261212	1	65	1	1	1	1	0	4	4	0	0	1	2	0	1	2	10	1	1	11.86	62.8	1	4	4	1.34	4.15	0.82	3.06	10.8	7.03	0	0	1	0	1	1	3
1009271251	2	71	1	1	1	1	0	4	4	0	0	0	2	0	1	1	13	1	1	6.35	59.8	0	3	6	1.54	2.5	0.9	1.65	6.3	5.18	0	0	1	0	1	0	3
1009281241	3	62	1	1	1	1	0	4	4	0	1	0	1	0	1	1	11	1	1	7.17	67.1	0	3	9	2.21502	4.75798	1.09624	2.64482	7.3	4.78	1	0	0	0	1	1	3
1010081231	1	59	1	1	1	1	0	3	4	0	0	0	2	0	1	1	11	1	1	7.96	66.4	0	5	5	2.46	4.2	0.92	2.96	6.59	5.01	1	0	1	0	1	0	2
1010081232	3	54	1	1	1	1	0	4	4	0	0	0	1	0	1	1	8	1	0	4.72	65.2	0	3	9	0.72	3.43	1.41	2.28	5.65	4.67	0	0	0	0	0	0	2
1010081252	1	80	1	1	1	1	0	3	4	0	0	0	2	0	1	2	11	0	1	12.09	130.9	0	6	6	1.92	5.24	0.92	3.73	11.8	13.1	1	1	1	1	1	1	3
1010101211	1	63	0	1	1	1	0	3	4	0	0	1	2	1	1	1	0	0	1	5.23	303.7	0	10	10	0.49	4.64	1.37	2.73	5.4	25.75	0	0	0	0	0	0	3
1010101231	1	60	1	1	1	1	0	4	4	1	0	0	1	0	1	1	21	1	1	3.85	111.6	1	4	4	1.58	5.64	0.83	3.99	6.45	7.85	0	1	1	1	1	0	3
1010101232	1	21	1	1	1	1	0	3	2	0	0	0	2	1	0	1	1	0	0	10.58	55.9	0	6	6	3.24	5.22	0.99	3.67	12.3	4.99	1	1	1	1	1	1	1
1010101251	3	55	0	1	1	1	0	3	4	0	0	0	2	0	1	1	2	1	0	6.57	65.6	1	2	6	3.06	4.57	1.03	3.05	5.83	5.57	1	0	1	0	1	0	2
1010101291	3	45	1	1	1	1	0	4	5	1	1	0	2	1	0	2	0	0	0	15.58	40.4	1	5	15	6.97	6.4	0.75	1.92	11.5	3.42	1	1	1	0	1	1	2
1010111231	4	72	0	1	1	0	1	2	2	0	0	1	1	0	1	1	7	0	0	10.13	48	0	3	12	1.61	5.83	1.49	4.13	10.35	2.54	0	1	0	1	1	1	3
1010111232	1	87	1	0	1	1	0	4	4	1	0	0	3	0	1	1	20	0	1	4.19	124.1	0	6	6	1.5	3.85	1.41	2.58	9.08664	6.83	0	0	0	0	0	1	3
1010111291	3	69	0	1	1	0	0	3	4	0	0	1	2	0	1	1	20	1	1	9.21	50.8	0	4	12	1.53	5.74	1.39	3.72	9.8	8.75	0	1	0	1	1	1	3
1010121211	4	31	1	1	1	1	1	4	4	1	1	0	1	0	0	1	5	1	1	5.67	51.8	1	9	36	11.57	11.76	2.06	8.2	12.2	2.61	1	1	1	1	1	1	1
1010121221	4	70	0	1	1	1	0	2	4	0	0	0	1	0	0	1	22	1	1	5.46	57.2	1	8	32	1.73	5.87	1.4	3.85	7.1	6.33	1	1	0	1	1	1	3
1010121291	3	34	1	1	1	1	0	4	5	1	0	0	1	0	0	1	2	1	1	10.34	50.1	1	8	24	0.93	3.49	0.7	2.54	11.3	5.2	0	0	1	0	1	1	1
1010131231	3	76	0	1	0	1	0	4	5	0	0	0	1	0	1	1	29	1	1	4.81	65.4	0	3	9	0.75	3.84	1.49	2.54	5.09	5.65	0	0	0	0	0	0	3
1010131232	4	53	0	1	1	1	0	4	4	0	0	0	1	0	0	1	2	0	1	4.87	47.1	0	5	20	1.18	4.58	1.35	3.14	6.45	5.59	0	0	0	0	0	0	2
1010131233	4	75	0	1	1	1	0	3	3	0	0	0	2	0	1	1	17	1	1	10.17	61	0	5	20	2.05	5.8	1.17	4.06	8.13	5.03	1	1	0	1	1	1	3
1010131271	4	73	0	1	1	1	0	3	4	0	0	0	1	1	1	1	1	0	0	10.28	62.1	1	5	20	1.26	4.8	1.42	2.81	9.2	7.99	0	0	0	0	0	1	3
1010131272	4	73	1	1	1	1	0	3	4	0	0	0	1	0	1	3	22	0	1	21.28	68.9	1	5	20	1.87	3.71	0.92	2.49	11.5	9.59	1	0	1	0	1	1	3
1010131273	4	69	0	0	1	1	0	2	3	0	0	0	1	1	0	1	0	0	0	6.65	60.7	1	6	24	2.26	4.28	1.13	2.65	6.5	6.28	1	0	0	0	1	0	3
1010131274	1	36	1	1	1	0	0	4	5	0	0	0	3	1	0	1	0	0	1	8.01	70.1	0	10	10	1.89	5.31	0.95	3.94	13.2	5.35	1	1	1	1	1	1	1
1010131291	1	51	1	0	1	0	0	3	5	1	1	0	3	1	1	1	0	0	0	9.49	47.8	1	6	6	4.24	5.41	1.01	3.89	8.4	4.32	1	1	1	1	1	1	2
1010141271	4	60	1	0	1	1	0	3	4	0	1	1	2	0	0	1	10	1	1	6.36	71.2	1	6	24	1.62	3.86	0.81	2.84	6.4	5.74	0	0	1	0	1	0	3
1010151251	3	48	1	1	0	1	0	3	4	1	0	1	1	0	1	3	10	1	1	22.19	68.6	0	2	6	5.6	6.67	2.08	3.92	9.7	7.87	1	1	1	1	1	1	2
1010151252	3	84	1	1	1	1	0	3	4	0	0	1	2	1	1	2	1	1	1	12.89	70	0	2	6	1.15	2.04	0.93	1.29	11.8	4.54	0	0	1	0	1	1	3
1010151253	4	55	1	1	1	1	0	3	4	0	1	0	2	0	0	1	8	1	1	10.17	68.8	1	1	4	1.84	4.29	1.07	3.02	10.3	6.19	1	0	0	0	1	1	2
1010151254	4	56	0	1	1	1	0	4	5	0	0	0	2	0	0	1	3	1	0	6.47	57.6	0	2	8	1.37	4.77	1.06	3.37	6.74	2.8	0	0	0	1	1	0	2
1010151255	4	79	0	1	1	1	0	3	3	0	0	1	1	0	1	2	12	0	0	11.35	70	0	1	4	1.18	3.81	1.22	2.4	7.02	6.16	0	0	0	0	0	1	3
1010151259	4	55	1	0	1	1	0	4	4	1	1	0	2	0	0	2	8	1	1	13.16	68.3	1	4	16	1.22	4.81	1.23	3.35	10.9	7.2	0	0	0	0	0	1	2
1010161211	4	79	0	0	1	1	0	3	4	0	0	0	2	0	1	1	22	1	1	7.98	48	1	6	24	1.41	7.64	1.23	5.72	6.3	5.53	0	1	0	1	1	0	3
1010181231	4	65	0	1	1	1	0	3	3	0	0	1	1	0	1	1	6	0	0	7.1	60.8	1	4	16	1.22	4.25	1.27	2.54	7.2	5.17	0	0	0	0	0	1	3
1010181232	1	63	1	1	1	1	0	3	3	0	0	0	2	0	1	2	3	0	0	15.13	64.2	0	5	5	2.04	4.71	1.22	3.24	11	6.15	1	0	0	0	1	1	3
1010181233	1	71	1	1	1	1	0	4	3	0	0	0	3	0	0	2	15	1	1	11.86	62.5	0	6	6	1.53	5.49	0.48	3.68	9.7	4.66	0	1	1	1	1	1	3
1010181234	4	68	0	1	1	1	1	3	2	0	0	1	2	0	1	2	16	1	1	15.88	60	1	3	12	3.68	4.87	0.48	2.88	10.2	6.16	1	0	1	0	1	1	3
1010201252	4	47	1	0	1	1	0	4	5	1	0	1	1	0	0	2	8	0	1	11.38	63.2	0	1	4	0.78	5.63	0.51	3.93	8.6	5.34	0	1	1	1	1	1	2
1010211251	3	43	0	1	1	1	0	4	5	0	0	0	1	0	0	1	2	1	0	5.52	42.2	0	2	6	2.27	4.98	0.43	3.25	7.2	3.2	1	0	1	0	1	1	1
1010211252	3	56	1	1	1	1	0	4	4	0	1	0	2	0	1	2	13	1	1	11.76	61.7	0	2	6	3	4.54	0.31	3.1	6.7	5.51	1	0	1	0	1	0	2
1010221291	4	68	1	1	1	0	0	3	4	0	0	0	2	0	1	1	15	1	1	10.6736	67.6153	1	6	24	2.21502	4.75798	1.09624	2.64482	13.1	5.77802	1	0	0	0	1	1	3
1010231291	1	57	1	1	1	1	0	3	5	1	0	0	2	0	1	1	7	1	1	6.62	75	0	16	16	3.29	5.56	1.04	4.05	7.1	5.38	1	1	0	1	1	1	2
1010241231	1	75	0	0	0	1	0	2	3	0	0	1	3	0	1	3	11	1	1	17.3	60	0	6	6	1.6	4.97	0.41	3.56	10.5	4.82	0	0	1	1	1	1	3
1010251231	4	66	1	1	1	1	0	3	3	1	0	0	2	0	0	1	12	0	1	6.81	74.9	1	4	16	9.67	4.66	0.23	2.82	7.8	5.38	1	0	1	0	1	1	3
1010261211	4	52	0	1	1	1	0	3	3	0	0	0	1	0	0	1	3	0	1	8.12	41.2	1	6	24	1.07	4.75	1.05	3.1	8.2	4.81	0	0	0	0	0	1	2
1010271211	4	65	1	1	1	1	0	4	3	0	0	0	1	0	1	1	20	1	1	4.5	82.5	1	9	36	1.24	5.36	1.25	3.62	10.5	4.47	0	1	0	1	1	1	3
1010271291	3	54	1	1	1	1	0	4	4	1	0	0	2	0	1	1	2	1	0	8.41	60.9	0	6	18	2.85	5.52	1.1	4	7.8	4.37	1	1	0	1	1	1	2
1010281271	4	74	1	1	1	1	0	3	3	0	0	0	2	0	1	1	7	0	0	6.13	63.5	1	4	16	0.58	3.97	0.97	2.5	5.8	4.63	0	0	1	0	1	0	3
1010281272	4	49	0	0	1	0	1	2	2	0	0	0	2	0	0	1	3	1	1	7.24	36.7	1	4	16	1.68	4.29	0.99	2.83	7.8	4.45	0	0	1	0	1	1	2
1010291231	1	46	1	0	1	1	0	4	3	1	1	0	2	0	1	2	12	1	0	13.95	63	0	7	7	1.86	5.4	0.43	3.69	9.4	4.86	1	1	1	1	1	1	2
1010291251	3	54	1	1	1	1	0	3	4	1	0	0	1	0	0	1	7	1	1	5.32	69.6	0	2	6	1.14	3.86	0.39	2.72	5	5.15	0	0	1	0	1	0	2
1010291271	#NULL!	46	1	1	1	1	0	4	5	1	1	0	3	0	1	2	18	1	1	14.34	49.2	1	4.84314	#NULL!	7.71	6.36	1.29	4.31	10.8	5.22	1	1	0	1	1	1	2
1010291272	3	61	1	1	1	1	0	3	5	0	0	0	2	0	0	2	20	1	1	16.38	51.5	0	6	18	0.72	3.76	0.86	2.53	12.5	6.39	0	0	1	0	1	1	3
1010301231	1	68	1	0	1	1	0	3	4	1	0	0	2	0	1	2	5	1	1	12.2	52	0	4	4	1.39	4.5	0.41	3.01	7.7	4.48	0	0	1	0	1	1	3
1010301232	1	61	1	0	1	1	0	3	3	0	0	0	3	0	1	2	14	1	1	11.36	63	1	4	4	4.03	3.79	0.43	2.19	10.5	4.12	1	0	1	0	1	1	3
1010301291	4	48	0	1	1	1	0	4	5	0	0	0	1	0	1	1	10	1	0	8.38	47.5	1	8	32	2.65	4.84	1.03	3.36	6.5	4.76	1	0	1	0	1	0	2
1010311291	2	51	1	1	1	1	0	4	4	0	0	0	3	0	1	3	5	0	0	19.87	70.5	1	7	14	0.6	2.67	0.61	1.78	10.6	8.45	0	0	1	0	1	1	2
1011021211	4	64	0	1	0	1	0	4	4	0	0	0	2	0	0	2	20	1	1	14.05	60.5	1	8	32	2.16	6.38	1.45	4.31	8.2	5.17	1	1	0	1	1	1	3
1011031221	3	59	0	1	0	1	0	3	3	0	0	0	1	0	0	2	23	1	1	14.01	43.1	0	3	9	1.4	7.19	1.41	5.11	12	3.85	0	1	0	1	1	1	2
1011031271	3	56	0	1	1	1	0	4	4	0	0	0	2	0	0	1	6	1	0	10.01	56.9	0	6	18	1.44	5.46	1.31	3.57	9.3	4.37	0	1	0	1	1	1	2
1011041221	3	52	0	1	1	1	1	3	3	0	0	1	3	1	1	3	0	1	0	18.1	46.8	1	5	15	1.91	5.19	0.98	3.72	14.5	4.14	1	1	1	1	1	1	2
1011041222	2	67	0	1	1	1	0	3	4	0	0	1	1	0	1	1	1	0	0	4.89	54.8	1	6	12	2.44	7.17	1.3	5.24	6.3	4.68	1	1	0	1	1	0	3
1011041223	1	44	1	1	0	1	1	3	3	1	1	0	3	0	1	2	10	0	1	11.61	50.1	1	8	8	2.09	4.63	1.23	2.88	6.9	2.66	1	0	0	0	1	0	1
1011041251	2	66	0	1	1	1	1	3	5	0	0	0	1	0	1	2	21	0	1	12.17	45.8	0	6	12	3.05	4.48	1.09	2.88	10	4	1	0	0	0	1	1	3
1011041252	4	69	1	1	1	1	0	2	4	1	0	1	2	0	1	3	24	1	1	22.19	244.9	0	2	8	3.9	7.08	1.39	4.64	9.9	16.53	1	1	0	1	1	1	3
1011041291	3	66	1	1	1	1	0	3	5	1	0	0	2	0	1	1	26	1	1	4.56	66.3	1	3	9	0.87	2.31	0.79	1.14	7.7	7.61	0	0	1	0	1	1	3
1011051221	1	70	0	0	1	0	0	2	3	0	0	1	3	0	1	2	18	1	1	12.48	56.9	1	6	6	2.09	4.04	0.84	2.84	8.6	5.74	1	0	1	0	1	1	3
1011051222	3	54	0	1	1	0	1	1	3	0	0	1	2	0	0	3	11	1	1	20.13	44.5	1	8	24	1.05	4.89	1.1	3.31	11.7	4.47	0	0	0	0	0	1	2
1011051231	1	53	1	0	1	1	0	4	4	0	0	1	2	0	0	1	9	1	1	6.16	76.6	0	10	10	1.67	4.04	0.87	2.81	6.3	6.41	0	0	1	0	1	0	2
1011051232	1	54	1	0	1	1	0	4	3	0	0	0	3	0	1	1	17	1	1	9.59	114.5	0	8	8	1.74	4.38	1.32	3.29	6.7	8.85	1	0	0	0	1	0	2
1011061231	1	70	1	1	1	1	0	3	3	0	0	0	2	0	1	1	21	1	1	6.92	87.9	0	6	6	2.25	3.59	1.04	2.48	7.3	7.21	1	0	0	0	1	1	3
1011061232	4	70	0	1	1	1	0	2	3	0	0	1	3	0	0	1	13	1	0	3.98	60.5	1	5	20	1.04	3.35	1.15	2.36	7.6	5.05	0	0	0	0	0	1	3
1011061233	1	65	0	1	1	1	0	4	3	0	0	1	3	0	1	1	3	1	0	4.05	50	0	8	8	2.3	4.5	1.03	3.43	5.9	5.77802	1	0	1	1	1	0	3
1011071231	1	81	0	0	0	1	0	2	4	0	0	0	2	0	1	3	7	0	1	29.04	59.5	0	10	10	1.73	4.78	0.96	3.84	13.1	8.76	1	0	1	1	1	1	3
1011071232	1	61	1	0	1	0	0	3	2	1	1	0	2	1	1	2	1	0	0	12.8	67.4	0	6	6	1.8	4.31	0.94	3.4	7.4	4.5	1	0	1	1	1	1	3
1011071233	1	59	1	1	1	1	0	3	4	1	1	0	1	0	1	1	10	1	1	6.55	63.7	0	7	7	1.3	4.14	1.11	3.07	8.4	5.24	0	0	0	0	0	1	2
1011071234	4	56	0	0	1	1	0	4	3	0	0	1	1	0	1	2	16	0	1	12.98	59.3	1	6	24	1.01	6.46	2.93	4.44	6.4	5.51	0	1	1	1	1	0	2
1011081221	1	48	0	1	0	1	0	4	5	0	0	1	1	0	1	2	15	1	1	12.8	35.2	0	6	6	2.21502	4.75798	1.09624	2.64482	11.1	7.16	1	0	0	0	1	1	2
1011101221	1	57	1	1	1	1	0	4	1	1	0	1	1	0	1	1	12	1	1	4.88	56.7	0	4	4	0.89	3.89	0.95	2.53	11.2	4.92	0	0	1	0	1	1	2
1011101222	1	63	1	1	1	0	0	2	4	0	0	1	2	0	1	1	18	1	1	8.25	86.1	0	6	6	0.97	2.48	0.61	1.64	9.2	8.04	0	0	1	0	1	1	3
1011101251	4	64	1	1	1	1	0	4	5	1	1	0	1	0	1	1	31	0	1	5.22	60	0	1	4	0.72	3.77	1.07	2.86	9.8	4.65	0	0	0	0	0	1	3
1011101271	3	62	1	1	1	1	0	3	4	0	0	0	2	0	1	2	20	1	1	11.83	57.4	0	6	18	1.27	3.71	0.79	2.56	9.4	5.27	0	0	1	0	1	1	3
1011111211	4	50	1	0	1	1	0	4	3	0	0	0	1	0	0	2	3	1	1	13.2	84.7	1	10	40	0.57	4.86	1.01	3.4	9.1	6.19	0	0	1	1	1	1	2
1011111241	4	43	1	0	1	1	0	4	4	1	1	0	1	1	0	1	1	0	1	9.71	54.4	1	3	12	2.15	3.67	0.84	2.73	8.3	6.94	1	0	1	0	1	1	1
1011121211	1	72	0	1	0	1	0	2	4	0	0	1	2	0	1	1	5	1	1	7.3	97.4	1	4.84314	4.84314	2.21502	4.75798	1.09624	2.64482	5.9	13.81	1	0	0	0	1	0	3
1011121219	4	61	1	1	1	1	0	4	3	0	0	0	3	0	0	1	17	1	1	8.59	62.7	1	10	40	1.54	4.46	0.91	3.1	6.8	4.68	0	0	1	0	1	0	3
1011121221	1	50	1	1	1	1	1	3	3	0	1	0	2	0	0	2	5	0	1	11.31	50.8	1	4	4	1.32	3.9	0.98	2.58	9.5	6.39	0	0	1	0	1	1	2
1011121231	1	62	1	1	1	1	0	3	4	1	0	0	2	0	1	1	11	1	1	5.45	119.4	0	6	6	1.71	2.84	0.82	2.12	6	9.45	1	0	1	0	1	0	3
1011121271	4	65	0	1	1	1	0	4	4	0	0	1	1	0	1	1	14	1	0	5.33	83.4	1	5	20	1.89	5.78	1.22	3.85	6.1	6.21	1	1	0	1	1	0	3
1011121272	4	56	1	1	1	1	1	3	4	0	0	0	1	0	0	1	3	1	1	6.28	62.1	1	4	16	1.88	5.16	1.01	3.77	7.8	8.22	1	0	1	1	1	1	2
1011131211	4	64	1	1	1	1	0	4	3	1	0	0	2	0	1	1	12	1	1	7.31	89.1	1	9	36	2.21	4.03	0.91	2.66	8.7	6.45	1	0	1	0	1	1	3
1011131231	1	80	1	0	1	1	0	2	3	0	0	1	2	1	1	1	1	1	0	5.97	73	0	6	6	0.74	3.83	1.07	2.92	8.6	6.5	0	0	0	0	0	1	3
1011131233	3	57	0	1	1	1	0	3	3	0	0	1	2	0	1	1	6	1	1	10.11	46.8	1	5	15	2.64	5.41	1.11	3.82	8.1	4.5	1	1	0	1	1	1	2
1011131271	4	68	0	1	0	1	0	3	4	0	0	0	1	0	1	2	8	1	1	12.83	63.8	0	5	20	1.05	4.22	1.37	2.22	11.2	7.48	0	0	0	0	0	1	3
1011131272	4	70	0	1	1	1	0	3	4	0	0	1	1	0	1	1	2	0	0	7.1	75.7	1	5	20	1.07	5.46	1.19	3.63	7.8	5.07	0	1	0	1	1	1	3
1011131273	4	70	1	0	1	1	0	2	3	0	1	0	2	0	1	1	5	1	1	9.33	67.4	1	5	20	0.99	3.76	0.6	2.77	12.6	9.98	0	0	1	0	1	1	3
1011141221	2	57	0	1	1	1	0	3	4	0	0	1	1	0	1	1	2	1	1	10.6736	67.6153	1	4	8	2.43	4.04	1.04	2.62	7.8	5.77802	1	0	0	0	1	1	2
1011161271	1	35	1	1	1	0	1	3	2	1	1	0	2	1	0	1	0	0	0	10.28	62.9	0	8	8	1.1	3.8	0.83	2.64	11.2	5.09	0	0	1	0	1	1	1
1011161272	3	56	1	1	1	1	0	3	4	0	0	0	1	0	1	1	2	1	0	6.75	56	0	6	18	0.58	3.32	0.78	2.18	7.4	5.97	0	0	1	0	1	1	2
1011171211	4	75	0	1	1	1	0	4	4	0	0	0	1	0	1	1	28	0	1	5.21	67.9	1	10	40	1.66	5.19	0.99	3.81	7.2	5.45	0	1	1	1	1	1	3
1011171212	4	60	1	1	1	1	0	4	3	0	0	0	2	0	1	3	8	1	1	21.78	58.9	1	10	40	1.17	3.74	0.82	2.57	11.4	8.33	0	0	1	0	1	1	3
1011171221	1	68	1	1	1	1	0	2	3	0	0	1	2	0	1	1	17	1	1	7.09	62.2	1	6	6	0.49	4.45	1.17	2.65	8.3	5.47	0	0	0	0	0	1	3
1011181221	1	65	0	1	0	0	0	2	3	0	0	1	3	1	1	1	0	1	1	10.06	63.1	0	6	6	2.21502	4.75798	1.09624	2.64482	7.8	8.21	1	0	0	0	1	1	3
1011181231	1	63	1	1	1	1	0	3	3	1	0	0	2	0	1	1	8	1	1	7.52	87.9	0	6	6	3.66	4.66	1.14	3.21	7.8	6.2	1	0	0	0	1	1	3
1011181232	1	51	1	1	1	1	0	3	4	0	0	0	2	0	1	1	6	0	0	7.97	63.9	0	8	8	1.11	2.84	1.33	1.77	5.6	4.5	0	0	0	0	0	0	2
1011181251	4	54	1	1	1	1	0	4	5	0	0	0	2	0	0	3	7	0	1	19.98	76.9	1	2	8	3.35	4.63	0.86	3.43	11.8	5.36	1	0	1	1	1	1	2
1011181252	4	83	0	1	0	1	1	1	4	1	0	1	2	0	1	1	11	0	0	5.93	78.1	0	4	16	0.96	4.11	1.17	3.05	7.5	7	0	0	0	0	0	1	3
1011191231	4	65	0	0	1	1	0	2	3	0	0	1	1	0	1	1	12	1	1	5.32	49.3	0	5	20	1.2	2.82	1.35	1.95	7	4.1	0	0	0	0	0	1	3
1011191232	1	80	0	1	0	0	1	1	2	0	0	0	2	0	1	1	17	1	1	10.91	41.4	0	8	8	1.97	6.57	1.44	5.03	7.8	5.19	1	1	0	1	1	1	3
1011191233	4	61	0	1	1	1	1	2	2	0	0	1	1	0	1	2	13	1	0	13.9	59.3	0	5	20	2.39	5.75	1.12	4.35	10.5	6.26	1	1	0	1	1	1	3
1011241221	1	65	1	1	1	1	0	2	4	0	0	1	1	1	1	1	0	0	0	10.31	63.6	1	2	2	1.55	3.24	0.72	2.21	9.9	4.58	0	0	1	0	1	1	3
1011251221	1	69	0	1	1	1	0	2	4	0	0	1	3	1	1	1	0	0	1	6.47	70.3	0	6	6	3.82	3.05	0.99	1.55	7.9	5.79	1	0	1	0	1	1	3
1011251222	1	66	0	1	1	1	0	2	4	0	0	1	2	1	1	1	0	0	1	4.53	58.5	0	4	4	1.35	3.65	1.17	2.12	7.7	4.77	0	0	0	0	0	1	3
1011251251	3	65	1	1	1	0	0	3	4	0	0	1	2	0	1	1	13	1	1	9.38	67.4	0	3	9	2.95	4.92	1.17	3.59	9.8	4.17	1	0	0	1	1	1	3
1011251252	3	53	0	1	1	1	1	3	4	0	0	1	1	0	1	1	14	0	1	5.75	86.4	0	2	6	2.42	4.88	1.29	3.56	10.7	8.93	1	0	0	1	1	1	2
1011261211	4	60	1	0	1	1	0	4	4	0	0	0	2	0	1	1	4	1	1	9.17	60.7	1	9	36	2.35	3.94	0.89	2.67	6.5	4.12	1	0	1	0	1	0	3
1011261212	4	54	1	1	1	1	1	3	3	0	0	0	2	0	1	3	25	0	0	16.75	86.3	1	6	24	1.34	5.68	1.04	4.2	12	8.06	0	1	0	1	1	1	2
1011261213	4	53	1	0	1	1	0	4	4	0	0	0	3	0	1	2	15	1	1	16.12	44.7	1	12	48	5.88	4.59	0.95	3.1	10.1	4.29	1	0	1	0	1	1	2
1011261221	4	54	1	1	1	1	0	3	4	0	1	0	1	0	0	1	9	0	0	8.41	48.3	1	6	24	1.8	5.75	1.17	4.01	12.8	5.78	1	1	0	1	1	1	2
1011261251	3	69	1	1	1	1	0	3	4	0	0	0	2	0	1	2	18	1	1	12.8	77.9	1	2	6	0.83	3.92	1.08	2.99	9.4	6.22	0	0	0	0	0	1	3
1011261252	2	53	0	1	1	1	1	3	4	0	0	1	2	1	0	3	1	1	0	17.6	40.7	0	1	2	4.68	5.51	1.09	3.93	11.2	3.64	1	1	0	1	1	1	2
1011271221	2	53	1	0	1	1	0	3	4	1	0	0	2	0	1	3	10	1	1	20.24	49.2	1	3	6	1.31	4.39	0.77	3.24	12.5	6.56	0	0	1	0	1	1	2
1011271251	3	52	1	1	1	1	0	3	4	0	1	0	2	0	1	1	4	1	1	8.95	60.5	1	2	6	2.91	2.32	0.56	1.62	7	5.11	1	0	1	0	1	1	2
1011291231	1	69	0	1	1	1	0	3	3	0	0	0	1	0	1	1	26	0	1	8.2	43.9	0	5	5	2.85	4.46	0.73	3.21	10.3	4.73	1	0	1	0	1	1	3
1011291241	4	73	0	1	1	0	1	2	4	0	0	1	2	0	0	2	18	1	1	13	53.4	1	1	4	1.15	5.45	1.06	3.44	8.9	6.12	0	1	0	1	1	1	3
1012021231	4	64	0	1	1	1	0	2	3	0	0	1	2	0	1	1	20	1	0	9.7	55.1	0	5	20	2.2	3.09	0.81	2.06	8.8	5.13	1	0	1	0	1	1	3
1012021232	3	71	0	1	1	0	0	2	2	0	0	0	2	1	1	2	1	0	0	15.26	70.3	1	4	12	3.32	7.3	0.99	5.46	12.2	6.41	1	1	1	1	1	1	3
1012031241	3	80	0	1	1	1	1	3	4	0	0	1	1	0	1	1	13	1	1	8.8	89.9	0	3	9	3.15	5.58	0.89	3.87	6.7	9.98	1	1	1	1	1	0	3
1012031242	#NULL!	79	1	1	1	1	0	3	4	0	0	0	1	0	1	1	21	1	1	7.46	238	1	3	#NULL!	1.04	3.75	1.04	2.69	9.6	22.59	0	0	0	0	0	1	3
1012051211	1	73	0	1	1	0	1	2	1	0	0	1	2	0	1	1	6	1	1	5.69	61.7	1	3	3	1.64	5.5	1.19	4.11	6.3	4.1	0	1	0	1	1	0	3
1012051231	1	26	1	1	1	0	0	4	4	1	1	0	2	1	1	3	1	0	0	19.77	72.2	0	5	5	2.17	5.13	0.76	3.87	9.8	5.15	1	0	1	1	1	1	1
1012061211	1	68	0	1	1	1	1	1	3	0	0	1	1	0	1	2	17	1	1	15.18	44.6	1	4	4	1.05	3.94	1.15	2.86	7.2	4.68	0	0	0	0	0	1	3
1012061231	1	43	1	1	1	1	0	4	4	1	1	0	2	0	1	3	3	1	0	18.44	74.7	0	8	8	1.55	4.68	0.93	3.45	8.7	5.91	0	0	1	1	1	1	1
1012061251	3	57	1	1	1	0	0	3	5	0	0	0	2	0	1	1	7	0	1	8.05	73.2	0	2	6	2.14	2.96	0.75	2.02	6.7	8.87	1	0	1	0	1	0	2
1012071251	4	57	0	1	1	0	0	4	4	0	0	1	3	0	1	3	7	1	1	21.71	47.3	0	3	12	2.37	5.37	0.96	3.89	11.2	4	1	1	1	1	1	1	2
1012071252	3	55	1	1	1	1	0	4	5	0	0	0	2	0	1	1	8	1	1	8.87	56.8	0	4	12	1.64	3.07	0.91	2.07	8.2	6.49	0	0	1	0	1	1	2
1012081251	3	62	1	1	1	0	1	3	4	0	0	0	2	0	1	1	7	1	1	6.3	70	1	3	9	2.19	4.57	0.92	3.23	6.7	5.81	1	0	1	0	1	0	3
1012081252	2	89	0	1	0	1	0	3	4	0	0	1	2	0	1	1	9	1	1	7.87	73	0	4	8	1.86	6.14	1.39	4.53	8.7	4.38	1	1	0	1	1	1	3
1012091211	4	66	0	1	1	1	0	3	3	0	0	1	1	0	1	1	4	1	1	9.18	47.3	1	2	8	3.09	4.28	0.81	2.87	8.2	3.94	1	0	1	0	1	1	3
1012101211	4	68	1	1	1	1	0	3	4	1	1	0	3	0	1	1	16	1	1	9.54	53.9	1	8	32	3.07	6.04	1.17	4.29	7.3	7.38	1	1	0	1	1	1	3
1012121251	3	70	1	1	1	1	0	4	5	1	0	0	1	0	0	1	7	1	1	5.2	63	1	2	6	1.13	5	1.29	3.56	6.7	5.42	0	0	0	1	1	0	3
1012131251	3	60	1	0	1	1	1	4	5	1	0	0	2	0	1	1	16	1	1	6.54	67.6	1	2	6	1.03	2.88	0.73	2.07	7.1	5.58	0	0	1	0	1	1	3
1012201211	1	58	1	1	1	1	0	3	4	0	0	0	2	1	1	1	1	1	1	7.59	103.5	1	3	3	1.62	3.99	1.06	2.86	8.1	6.26	0	0	0	0	0	1	2
1012201251	3	60	0	1	0	1	0	3	5	0	0	0	2	0	1	2	15	0	1	14.39	32.9	0	3	9	1.51	4.46	1.19	3.07	14.7	4.85	0	0	0	0	0	1	3
1012201255	2	41	1	0	1	1	0	4	5	1	0	0	3	1	0	3	1	1	1	26.76	51.9	0	5	10	1.74	6.04	1.04	4.53	10.5	4.67	1	1	0	1	1	1	1
1012231231	4	68	1	1	1	1	0	3	4	0	0	0	1	0	1	3	3	1	1	22.19	50.3	0	5	20	1.18	4.62	1.69	3.26	9.6	6.44	0	0	1	0	1	1	3
1012231232	4	56	0	1	1	1	0	3	3	0	0	0	2	0	1	1	6	1	1	6.94	46.1	1	4	16	3.75	3.84	0.92	2.65	5.9	2.34	1	0	1	0	1	0	2
1012251231	1	51	1	1	1	1	0	4	4	1	1	0	2	0	1	1	9	1	0	9.14	66.3	0	5	5	2.92	5.59	1.06	3.78	7.7	5.39	1	1	0	1	1	1	2
1012261231	1	65	1	1	1	1	0	4	4	0	0	0	1	0	1	2	11	1	1	12.63	63.4	0	5	5	1.36	3.09	1.16	1.9	7.7	4.08	0	0	0	0	0	1	3
1012271231	1	67	1	1	1	1	0	3	4	0	0	0	1	0	0	3	18	1	1	22.45	73.2	0	6	6	1.15	4.89	1.67	3.31	14.8	9.8	0	0	1	0	1	1	3
1012301251	3	50	1	1	1	1	0	4	5	1	1	0	1	0	0	1	11	1	1	7.91	58.3	0	4	12	0.78	3.52	1.03	2.34	6.7	6.13	0	0	1	0	1	0	2
1101131571	4	68	1	0	0	0	1	2	1	0	0	0	2	0	1	1	8	1	1	6.9	60.7	1	2	8	1.1	3.97	1.16	2.85	6.2	7.1	0	0	0	0	0	0	3
1101141571	4	59	1	1	1	0	0	4	4	1	1	0	2	1	0	1	1	0	0	8.5	71.7	0	5	20	3.2	5.42	1.28	3.49	7.5	4.6	1	1	0	1	1	1	2
1101141578	3	67	0	0	1	0	1	1	1	0	0	1	2	0	1	2	7	1	1	11.5	86.9	0	5	15	17.34	7.49	1.98	3.8	9.3	7.6	1	1	1	1	1	1	3
1103101501	1	42	1	1	1	1	0	3	2	1	1	0	2	0	0	2	5	1	1	13.5	67.6153	1	8	8	3.84	3.75	0.6	2.16	10.7	5.77802	1	0	1	0	1	1	1
1103111501	4	45	1	1	1	1	0	4	4	1	1	0	2	0	1	3	5	1	1	20.6	62.6	1	10	40	1.05	5.13	0.84	3.77	15.1	4.1	0	0	1	1	1	1	2
1103111502	3	60	0	1	1	0	0	4	4	0	0	0	1	0	1	2	17	1	1	15.2	43.2	0	10	30	3.63	4.95	1.09	2.85	9.6	5.7	1	0	0	0	1	1	3
1103171501	2	57	1	1	1	1	0	4	4	1	1	0	2	0	1	1	3	1	1	8.1	58	0	5	10	0.84	4.09	0.92	2.57	8.6	4.8	0	0	1	0	1	1	2
1103171502	2	54	0	1	1	1	0	4	2	0	0	0	2	0	1	1	1	1	0	9.1	37.8	0	10	20	1.61	4.32	1.14	2.66	8.6	2	0	0	0	0	0	1	2
1103181501	3	57	1	1	1	0	0	4	3	0	0	0	2	0	1	3	15	1	1	30.7	63.9	0	10	30	0.8	4.78	1.01	3.17	12.4	6.3	0	0	1	0	1	1	2
1103211501	3	47	1	1	1	1	0	4	4	1	0	0	2	0	1	1	5	1	1	9.2	54.4	0	10	30	1.35	4.25	1.19	2.43	10	5.6	0	0	0	0	0	1	2
1103251501	3	49	1	1	1	1	0	3	2	0	0	0	3	0	1	2	7	1	1	12.1	54.5	0	9	27	2.67	4.04	0.74	2.58	10.5	4.3	1	0	1	0	1	1	2
1103291501	3	52	0	1	1	1	0	4	3	0	0	0	2	0	0	1	19	1	1	9.5	48.2	1	8	24	1.38	4.84	1.4	2.91	8.6	8.1	0	0	0	0	0	1	2
1103301501	2	53	1	1	1	0	0	4	4	0	0	0	3	0	1	3	3	1	1	18.9	57.1	0	8	16	1.97	4.34	0.81	2.96	9.9	5.6	1	0	1	0	1	1	2
1103301502	3	60	0	1	1	0	0	4	3	0	0	0	3	0	0	1	15	0	1	6.3	48.7	1	8	24	1.1	4.51	1.28	2.7	6.3	5.2	0	0	0	0	0	0	3
1103311501	3	65	1	1	1	0	0	4	3	0	1	0	2	0	0	1	1	1	0	8.2	43.4	0	10	30	1	3.39	0.89	2.14	7.3	4.1	0	0	1	0	1	1	3
1103311502	2	66	0	1	1	1	0	4	4	0	0	0	3	0	0	2	15	0	1	12	51.8	0	8	16	1.41	4.63	1.01	3.13	6.7	4.7	0	0	1	0	1	0	3
1103311503	3	50	1	1	1	1	0	4	4	0	0	0	2	0	1	1	15	1	1	6.2	63.1	0	8	24	0.77	4.58	1.18	2.98	6.6	6	0	0	0	0	0	0	2
1105111571	1	56	0	1	1	0	0	2	4	0	1	1	1	0	1	1	4	1	0	9.6	44.2	0	1	1	2.21502	4.75798	1.09624	2.64482	11.3	3.3	1	0	0	0	1	1	2
1105111572	4	65	0	1	1	0	1	1	1	0	0	1	2	0	1	1	3	1	0	7.6	64.9	1	4	16	2.07	3.99	1.18	2.38	7.1	6.8	1	0	0	0	1	1	3
1105111578	1	77	0	1	0	1	0	4	4	0	1	1	2	0	1	1	38	1	1	9.4	116.3	1	2	2	2.03	2.72	0.97	1.37	7.5	7.9	1	0	1	0	1	1	3
1105121571	1	57	1	1	1	1	0	3	3	1	1	1	2	0	1	2	2	1	1	16.5	66.5	1	2	2	1.75	4.75	1.16	2.95	11.6	5.6	1	0	0	0	1	1	2
1105131571	2	44	0	1	1	1	0	4	5	0	0	0	1	0	1	1	2	1	0	7.3	53.6	0	3	6	1.42	4.44	1.03	0.65	6.4	3.9	0	0	1	0	1	0	1
1105141571	2	42	1	1	1	1	0	4	4	0	1	0	2	0	0	1	5	1	0	5.7	91.6	1	3	6	2.01	4.28	0.93	2.7	6.2	7.2	1	0	1	0	1	0	1
1105141572	1	49	0	0	1	0	1	2	3	0	0	0	2	1	0	1	0	0	0	9.8	46.9	1	3	3	0.59	5.38	1.73	3.2	6.7	3.7	0	1	1	0	1	0	2
1105181571	1	54	0	1	1	1	0	4	4	0	1	0	1	0	0	1	12	1	0	6.4	40.8	0	4	4	1.02	5.34	1.36	3.21	9.8	3.1	0	1	0	0	1	1	2
1105181572	1	54	0	1	1	1	0	4	4	0	0	0	2	0	0	1	5	1	0	6.7	42.8	0	4	4	1.47	6.43	1.62	3.8	6.2	6.6	0	1	1	1	1	0	2
1105181573	4	55	1	0	1	0	0	2	4	1	1	1	1	0	0	1	5	1	0	9.3	62.5	1	2	8	0.56	3.31	1	1.88	9	6.5	0	0	1	0	1	1	2
1105181574	4	66	1	1	1	1	0	3	3	0	1	0	2	0	1	2	2	1	0	13.2	57	1	1	4	1.19	3.4	0.74	2.05	9.1	5.4	0	0	1	0	1	1	3
1105191571	2	54	1	1	1	1	0	3	4	0	1	0	2	0	0	1	3	1	1	11	46.3	0	5	10	3.69	4.75	1.11	2.85	8.4	5.7	1	0	0	0	1	1	2
1105201571	2	30	1	1	0	0	1	4	4	0	1	0	3	0	0	2	5	0	0	11.2	70.1	1	3	6	4.51	5.2	0.91	3.21	8.2	6.9	1	1	1	0	1	1	1
1105211571	4	52	1	1	1	1	0	2	4	0	0	0	2	0	1	1	3	1	1	10.6736	55.4	1	4	16	4.35	3.73	0.72	2.25	4.7	5	1	0	1	0	1	0	2
1106011571	3	45	0	1	1	1	0	4	4	0	1	0	3	0	1	1	8	1	0	7.4	39.8	1	3	9	1.23	4.67	1.13	3.3	9.3	3.8	0	0	0	0	0	1	2
1106021571	3	53	1	1	1	1	0	3	4	0	1	0	2	0	0	2	3	0	1	12.6	54.5	1	3	9	2.08	3.07	0.94	1.92	8.5	4.3	1	0	1	0	1	1	2
1106021572	1	51	1	1	1	0	0	4	4	0	1	0	2	0	0	1	5	1	1	7.3	82.3	0	3	3	1.66	4.4	0.73	3.3	7.3	6.2	0	0	1	0	1	1	2
1106021573	4	63	0	1	1	1	0	4	4	0	0	0	1	0	0	3	20	0	1	28.1	52.3	1	3	12	1.33	4.88	1.54	3.11	10	7.7	0	0	0	0	0	1	3
1106081571	2	39	1	0	1	1	0	4	5	0	0	0	1	0	0	1	4	1	1	7.2	60.6	1	3	6	6.85	5.29	0.76	3.23	7.2	5	1	1	1	0	1	1	1
1106081572	4	78	0	1	0	1	0	3	3	0	0	1	1	0	1	1	23	1	1	9.6	71.1	1	2	8	1.06	4.22	1.08	2.75	9.08664	6.7	0	0	0	0	0	1	3
1106081573	1	38	0	1	1	0	0	1	4	0	0	1	1	0	0	2	2	1	1	13.8	48.6	0	3	3	0.83	3.99	1.06	2.64	13.8	5.1	0	0	0	0	0	1	1
1106091571	1	73	1	1	1	1	1	1	2	0	1	1	3	0	1	2	16	1	1	11.2	61	1	4	4	2.75	5.93	1.17	4	10.6	5.2	1	1	0	1	1	1	3
1106091572	4	68	0	1	0	1	0	3	3	0	0	1	1	0	0	2	12	1	1	14.4	53.9	1	2	8	1.83	4.74	1.2	2.97	7.8	7.7	1	0	0	0	1	1	3
1106101571	1	59	1	1	1	1	0	2	4	0	1	0	1	1	0	1	0	1	0	5	75.4	1	3	3	2.88	3.97	0.81	2.44	5.7	7	1	0	1	0	1	0	2
1106151641	1	49	0	1	1	1	0	4	4	0	0	0	3	0	0	2	3	1	0	13	40	0	5	5	1.68	5	0.9	3.59	8.4	7	0	0	1	1	1	1	2
1106151642	3	60	1	1	1	1	0	2	4	0	0	0	1	1	1	1	0	0	1	8.7	48.9	1	5	15	2	6.43	1.36	4.36	8.3	5.9	1	1	0	1	1	1	3
1106161651	4	51	1	1	1	1	0	3	2	1	1	0	2	0	1	1	7	1	1	4.5	213.8	1	4.84314	19.3725	2.4	7.19	1.48	4.89	5.7	9.9	1	1	0	1	1	0	2
1106171641	4	50	0	1	1	0	0	4	4	0	0	0	1	1	1	1	0	0	0	9.4	50.3	0	4	16	2	5.18	1.26	3.37	8	4.3	1	1	0	1	1	1	2
1106171642	4	63	0	1	1	1	0	4	4	0	0	0	1	0	1	2	2	1	0	13	72.7	1	3	12	3	4.74	0.89	1.36	9.2	7	1	0	1	0	1	1	3
1106181651	1	46	1	1	1	1	0	3	1	1	1	0	1	0	0	1	13	0	1	6.9	64	0	8	8	0.97	4.55	1.46	2.68	6.6	6	0	0	0	0	0	0	2
1106191641	4	66	1	1	1	1	0	3	4	1	1	1	1	0	0	1	10	1	0	7.8	54.1	1	1	4	1.63	4.72	0.78	3.38	9.6	5.7	0	0	1	1	1	1	3
1106221651	3	40	1	1	1	1	0	4	4	1	1	0	3	0	1	1	3	1	0	8.1	58.1	1	3	9	7.37	4.32	0.66	2.79	9.08664	4.6	1	0	1	0	1	1	1
1106231641	3	51	1	1	1	1	0	3	4	0	0	0	1	1	0	2	0	0	0	12	62.9	1	6	18	3.26	4.25	0.88	2.72	11.5	5.4	1	0	1	0	1	1	2
1106261651	#NULL!	#NULL!	#NULL!	#NULL!	#NULL!	#NULL!	#NULL!	#NULL!	#NULL!	#NULL!	#NULL!	#NULL!	#NULL!	#NULL!	#NULL!	#NULL!	#NULL!	#NULL!	#NULL!	#NULL!	#NULL!	#NULL!	#NULL!	#NULL!	#NULL!	#NULL!	#NULL!	#NULL!	#NULL!	#NULL!	#NULL!	#NULL!	#NULL!	#NULL!	#NULL!	1	3
1106291651	1	73	1	1	1	1	1	1	2	0	0	1	1	0	1	1	33	1	1	5.3	72.4	0	6	6	0.99	3.27	1	1.85	9.7	7.1	0	0	1	0	1	1	3
1106301641	1	57	0	0	1	0	1	2	2	0	0	0	1	0	0	1	3	1	0	6.2	52.9	1	2	2	1.08	4.66	0.82	3.32	10.2	7	0	0	1	0	1	1	2
1107011641	1	68	0	1	1	0	1	1	4	0	0	0	2	0	1	1	3	1	1	10.2	46.1	1	3	3	0.95	4.15	1.01	2.69	7.9	4.6	0	0	1	0	1	1	3
1107021641	3	47	0	1	1	1	0	4	3	0	0	0	2	0	1	1	17	1	1	9.3	40.9	1	5	15	1.12	6.27	1.41	4.21	10	8.3	0	1	0	1	1	1	2
1107021651	4	58	1	1	1	1	0	2	3	0	0	1	2	0	1	1	10	1	1	8.1	72.3	1	6	24	1.34	3.51	0.79	2.28	6.2	4.9	0	0	1	0	1	0	2
1107031651	4	64	1	1	1	1	0	4	1	0	1	0	2	0	0	2	17	1	0	15.3	46.9	1	5	20	1.08	3.22	0.87	1.84	8.6	3.7	0	0	1	0	1	1	3
1107031652	4	54	1	1	1	1	0	3	2	1	1	0	1	0	1	1	2	1	1	7.3	68.7	1	4	16	1.74	5.22	1.1	3.45	8.2	6.3	1	1	0	1	1	1	2
1107051641	3	68	1	1	1	1	0	4	5	1	0	1	2	0	0	3	5	1	1	18.8	66.5	0	8	24	3.4	4.85	0.83	3.17	9.1	5.4	1	0	1	0	1	1	3
1107051651	4	45	0	0	1	1	0	2	3	0	0	0	1	0	0	1	11	1	1	10.6	42.1	1	3	12	1.49	4.11	0.96	2.64	8.2	4.7	0	0	1	0	1	1	2
1107061641	4	55	1	1	1	1	0	3	5	1	1	1	1	0	1	3	3	1	1	24.5	40.2	1	8	32	4.2	5.88	1.11	3.79	13.7	3.9	1	1	0	1	1	1	2
1107061642	4	48	1	0	1	1	0	3	5	1	0	0	2	1	0	1	0	0	1	10.1	60.5	1	6	24	1.43	4.74	0.91	3.23	9.3	6.5	0	0	1	0	1	1	2
1107061643	4	62	1	1	1	1	0	3	4	0	0	0	2	0	0	1	3	1	1	5.4	67.6153	1	2	8	1.28	4.07	0.97	2.6	6.5	5.77802	0	0	1	0	1	0	3
1107061644	4	61	1	1	1	1	0	3	4	1	0	0	3	0	1	1	6	1	1	6.7	63.8	1	8	32	1.62	4.44	0.84	2.96	6.4	2.8	0	0	1	0	1	0	3
1107081651	4	73	1	1	1	1	0	3	4	1	0	0	2	0	1	2	11	1	1	14.5	70.9	0	5	20	0.71	3.4	1.05	2	12.9	4.9	0	0	0	0	0	1	3
1107101651	4	35	1	1	1	1	0	3	5	0	0	0	2	0	1	1	4	1	0	10.7	66.8	1	1	4	2.11	6.03	1.38	3.9	8.8	6.4	1	1	0	1	1	1	1
1107101652	4	56	1	1	1	1	1	4	4	0	0	0	1	0	0	1	18	1	1	5.5	94.3	1	3	12	0.86	3.97	0.65	2.68	9.1	3.4	0	0	1	0	1	1	2
1107101658	1	30	1	1	1	1	0	3	3	1	0	0	2	1	0	1	0	0	0	10.6	54.9	1	14	14	12	7.83	1.09	5.45	11.5	5.6	1	1	0	1	1	1	1
1107121651	4	76	1	1	1	1	0	1	3	0	0	0	2	0	0	1	30	1	1	8.7	80.5	1	4	16	1.25	5.58	1.28	3.55	8	5.2	0	1	0	1	1	1	3
1107131641	4	56	0	1	1	1	0	3	4	0	0	0	2	0	1	1	1	0	1	6.5	80.4	1	5	20	0.91	5.07	1.56	2.96	6.3	8.7	0	0	1	0	1	0	2
1107131642	3	54	1	1	1	1	0	4	4	1	1	0	1	0	1	3	0	1	1	17.2	64	1	2	6	1.56	4.26	0.79	2.82	13.3	4.4	0	0	1	0	1	1	2
1107131643	4	58	1	1	1	1	0	4	5	1	0	0	1	0	1	1	5	1	1	7	63.4	1	8	32	1.16	4.35	0.94	2.84	6.2	8	0	0	1	0	1	0	2
1107141641	4	66	0	1	1	0	0	1	4	0	0	0	2	1	1	2	0	0	0	14.6	111.4	1	3	12	2.74	4.71	1.03	2.84	12.8	9.9	1	0	1	0	1	1	3
1107141642	1	50	0	0	1	0	1	1	4	0	0	0	1	0	0	3	0	1	1	23.5	39.7	1	2	2	2.34	7.07	1.14	4.99	11.6	4.1	1	1	0	1	1	1	2
1107151641	3	62	0	1	1	1	0	3	4	0	0	0	3	0	0	2	0	0	0	12.8	55.1	0	4	12	2.24	6.52	1.45	4.22	8.4	4.3	1	1	0	1	1	1	3
1107151642	3	72	0	0	1	1	0	4	4	0	0	0	3	0	1	3	13	1	1	16.9	60.5	0	4	12	3.44	5.21	0.93	3.47	8.2	5.6	1	1	1	1	1	1	3
1107161641	4	69	0	1	0	1	0	4	4	0	0	0	1	0	1	2	12	1	1	12.4	49.7	0	5	20	2.11	5.28	0.87	3.8	8.2	4.3	1	1	1	1	1	1	3
1107181651	2	77	0	1	0	1	0	3	4	0	0	0	2	0	1	3	15	1	1	22	49.4	0	4	8	1.55	3.49	1.07	1.97	11.2	4.3	0	0	0	0	0	1	3
1107191651	1	71	0	0	0	0	1	1	1	0	0	1	1	0	1	2	10	1	1	12.2	126.7	0	6	6	2.8	3.5	0.77	2.06	8.1	9.9	1	0	1	0	1	1	3
1107201651	4	62	1	1	1	1	0	4	5	1	0	1	2	0	1	1	20	1	1	9	67.4	0	6	24	1.01	2.19	0.61	1.33	7.1	6.6	0	0	1	0	1	1	3
1107201652	4	67	1	1	1	0	1	1	2	0	1	0	1	0	1	1	20	1	1	9.7	50.5	1	5	20	1.8	4.75	1.04	3.1	6.5	3.5	1	0	0	0	1	0	3
1107221641	3	51	1	1	1	1	0	4	5	1	0	1	1	0	0	2	7	1	1	14.6	64.9	1	5	15	0.98	3.46	0.89	2.17	9.2	6.9	0	0	1	0	1	1	2
1107231641	3	40	1	1	1	1	0	4	5	1	1	0	2	0	0	1	2	1	1	8.8	58.9	1	5	15	6.16	5.02	0.92	2.96	7.6	6.7	1	0	1	0	1	1	1
1107231642	2	36	0	1	1	0	0	3	3	0	0	0	1	0	0	3	4	0	1	21.1	31.8	0	6	12	6.41	5.13	1.04	3.13	11.3	7	1	0	0	0	1	1	1
1107231651	3	56	1	0	1	0	1	3	1	0	0	0	1	1	1	1	0	1	0	8.2	53.1	0	5	15	0.99	3.21	1.02	1.84	6	6	0	0	1	0	1	0	2
1107241651	4	55	1	0	1	0	1	1	2	0	0	1	2	0	1	1	6	1	1	11.1	75	1	2	8	1.99	3.62	0.66	2.4	8.5	4.7	1	0	1	0	1	1	2
1107241658	4	56	1	1	1	0	1	3	2	1	0	0	2	0	1	1	6	1	1	4.8	67.6153	0	3	12	2.21502	4.75798	1.09624	2.64482	6.9	5.77802	1	0	0	0	1	0	2
1107251641	4	61	0	1	1	1	0	3	4	0	0	0	3	0	1	2	7	1	1	12.7	63.8	1	2	8	2.99	4.7	0.85	3.1	9.08664	6.5	1	0	1	0	1	1	3
1107251651	1	30	1	1	1	0	0	3	4	0	0	0	1	0	0	2	3	1	1	11.4	59.6	1	4	4	0.66	3.23	0.79	2.07	7	6.9	0	0	1	0	1	1	1
1107251652	3	45	0	1	1	1	0	4	3	0	0	0	3	0	1	3	2	1	0	16.8	53.5	1	3	9	5.56	3.62	0.68	2.05	10.7	5.7	1	0	1	0	1	1	2
1107271571	1	67	1	1	1	0	0	3	4	0	0	0	1	0	0	1	5	1	1	6.8	76.2	1	3	3	0.93	1.79	0.59	0.94	4.1	6.5	0	0	1	0	1	0	3
1107301651	3	66	0	1	1	1	0	3	3	0	0	0	1	0	1	1	13	1	1	8.1	61.4	1	4	12	9.15	6.12	0.91	3.34	8.6	5.7	1	1	1	0	1	1	3
1107301652	1	48	1	1	0	1	0	3	3	1	1	0	1	0	1	3	18	1	1	17.9	63.2	1	3	3	1.67	4.72	0.71	3.33	10.7	6	0	0	1	0	1	1	2
1108041571	1	51	0	1	1	0	1	1	3	1	0	0	1	0	0	1	3	1	0	9.3	65.9	0	4	4	2.36	4.15	0.84	2.77	8.4	5.8	1	0	1	0	1	1	2
1108041572	1	49	0	0	1	1	0	4	5	0	0	0	3	0	1	3	3	1	0	22.6	55	1	5	5	0.69	2.87	0.71	1.99	9.9	4.2	0	0	1	0	1	1	2
1108051651	1	57	0	1	1	1	0	3	4	0	0	0	2	0	1	3	12	1	1	16.9	42.5	1	5	5	7.31	6.18	1.01	3.83	8.8	3.8	1	1	1	1	1	1	2
1108051652	4	68	1	1	1	1	0	2	1	1	0	0	1	0	0	3	19	1	0	18.9	79.7	1	6	24	0.89	4.05	0.81	2.7	10.4	5.5	0	0	1	0	1	1	3
1108101641	4	55	0	1	1	1	0	4	5	0	0	0	1	0	0	1	9	1	1	6.4	52.4	1	1	4	0.94	4.9	1.62	3.11	7.7	4.6	0	0	1	0	1	1	2
1108101642	2	49	1	1	1	1	0	3	5	0	0	0	2	0	0	1	1	1	1	6.4	68.6	1	12	24	1.2	3.92	1.08	2.65	6.6	7	0	0	0	0	0	0	2
1108101643	4	53	1	1	1	1	0	4	5	0	0	0	1	0	1	1	2	1	1	4.7	76.3	1	2	8	0.78	4.58	1.51	2.85	7.6	7.4	0	0	0	0	0	1	2
1108151641	3	65	1	1	1	1	0	3	5	0	0	0	2	0	1	1	11	1	1	5.8	60.5	1	4	12	1.49	4.52	1.25	3	6.5	6	0	0	0	0	0	0	3
1108151651	4	54	0	1	0	1	0	4	4	0	0	0	2	0	1	1	0	1	1	5	58.7	1	4	16	1.62	4.08	1.14	2.62	5.4	6	0	0	0	0	0	0	2
1108151652	1	66	0	1	1	0	1	1	1	0	0	0	1	0	0	2	10	1	0	11.9	38.4	0	5	5	2.12	4.36	1.27	0.96	9.2	3.2	1	0	0	0	1	1	3
1108151655	2	62	0	1	1	1	1	2	2	0	0	0	2	0	0	1	6	1	0	6.7	62.4	1	3	6	2.03	5.16	1.31	3.57	7.1	6.4	1	0	0	1	1	1	3
1108171641	4	45	1	1	1	1	0	3	5	1	1	0	2	0	1	2	12	1	1	11.6	48.3	0	6	24	1.63	4.33	1.09	0.74	8.9	5.1	0	0	0	0	0	1	2
1108171642	3	58	0	1	1	1	0	3	5	0	0	0	2	0	1	2	12	1	1	13	61.1	0	4	12	2.34	5.4	0.95	4	9.1	4.7	1	1	1	1	1	1	2
1108171651	2	53	0	1	1	0	1	1	2	0	0	0	2	0	1	2	10	1	1	14.7	61.6	1	4	8	4.15	5.13	1.17	3.42	9.8	5.6	1	0	0	1	1	1	2
1108201571	4	66	1	1	1	1	0	1	3	0	1	0	3	1	1	1	0	0	0	7.2	64.3	1	4	16	1.34	5.21	1.03	3.84	9.08664	3.6	0	1	1	1	1	1	3
1108231571	4	57	1	1	1	1	0	4	3	0	0	0	1	0	0	1	1	1	1	7.1	55.7	1	2	8	2.5	5.12	0.9	3.68	8.5	9.7	1	0	1	1	1	1	2
1108241571	4	59	1	1	1	1	0	4	4	0	0	0	2	0	1	1	16	1	1	10	59.8	1	1	4	0.65	1.85	0.89	0.89	9.9	8.4	0	0	1	0	1	1	2
1108241572	4	60	0	1	1	1	0	3	4	0	0	0	1	0	1	2	10	1	1	12.9	38.5	1	2	8	2.19	3.64	1.13	2.08	12	5.9	1	0	0	0	1	1	3
1108241651	4	64	0	0	1	1	0	3	3	0	0	0	1	0	1	1	7	1	1	9.8	55.8	0	6	24	2.03	3.94	1.1	2.52	8.6	9.3	1	0	0	0	1	1	3
1108241652	1	50	1	0	1	1	0	4	4	0	0	0	2	0	1	1	14	0	1	10.2	56	1	3	3	1.44	2.98	0.51	2.24	10.2	8.3	0	0	1	0	1	1	2
1108241658	4	69	1	1	1	1	0	3	3	0	0	0	1	0	1	2	20	1	1	12.8	66.2	0	3	12	2.19	4	1.09	2.68	9.3	8.3	1	0	0	0	1	1	3
1108251571	4	82	0	1	0	1	0	2	3	0	0	0	2	0	1	1	20	1	1	8.6	130.7	1	3	12	2.81	6.05	1.05	4.05	7.8	7.6	1	1	0	1	1	1	3
1108251651	3	57	1	0	1	0	1	2	2	0	0	0	2	0	1	1	20	1	0	8.5	61.3	1	3	9	0.99	3.2	1.08	0.45	6.8	5.8	0	0	0	0	0	0	2
1108261571	4	71	0	0	1	1	1	2	3	0	0	0	2	0	1	1	22	1	1	8.7	38.2	1	3	12	1.24	5.48	0.96	4.1	8.8	6	0	1	1	1	1	1	3
1108261572	4	57	1	1	1	1	0	2	3	0	1	0	1	0	0	1	3	1	1	5.3	57	1	3	12	1.23	4.27	0.87	3.06	7.9	5	0	0	1	0	1	1	2
1108261651	1	63	0	0	1	0	1	1	2	0	0	0	2	0	0	1	5	1	1	5.9	49	0	3	3	1.04	4.76	1.09	3.42	9.3	5.8	0	0	0	1	1	1	3
1108291571	1	72	0	0	0	0	1	1	3	0	0	0	1	0	1	1	5	1	1	4.4	104	0	4	4	1.99	5.09	1.18	3.21	8.7	9.9	1	0	0	0	1	1	3
1109011571	4	77	0	1	0	1	0	1	3	0	0	0	2	0	1	1	13	1	1	5.2	50.5	0	2	8	0.48	3.02	1.17	1.68	5.7	5.3	0	0	0	0	0	0	3
1109011572	4	73	0	1	1	1	0	3	3	0	0	0	1	0	1	1	8	1	1	5.9	50.7	0	2	8	1.65	3.47	0.96	2.09	6.7	4.3	0	0	1	0	1	0	3
1109011573	4	66	0	1	1	1	0	3	3	0	0	0	3	0	1	1	5	1	1	6.2	53.6	1	3	12	1.75	7.61	1.41	5.63	6.8	3.7	1	1	0	1	1	0	3
1109011574	4	45	1	1	1	1	0	3	4	0	1	0	2	1	1	2	0	0	1	15.9	45.2	1	3	12	3.83	4.06	1.1	2.34	9.2	5.3	1	0	0	0	1	1	2
1109011575	3	62	0	0	1	0	1	1	3	0	0	0	3	0	1	2	3	1	1	14.1	102.8	1	3	9	2.84	4.84	0.94	3.34	10.6	6.5	1	0	1	0	1	1	3
1109011578	4	44	1	1	1	0	0	3	4	1	1	0	1	0	0	1	2	1	1	2	51.7	1	1	4	0.31	3.74	1.42	2.11	10.2	2.5	0	0	0	0	0	1	1
1109051651	1	78	0	1	1	1	1	2	2	0	0	1	1	1	0	1	0	1	0	9.4	57.4	0	6	6	1.53	5.89	1.11	4.35	7.7	5.3	0	1	0	1	1	1	3
1109061651	1	71	1	1	1	1	0	3	2	0	0	0	3	0	1	1	1	0	1	8.8	71.6	0	5	5	2.62	3.43	0.81	2.36	11.2	4.3	1	0	1	0	1	1	3
1109061658	4	59	1	1	1	1	0	3	4	0	1	0	2	0	1	3	13	1	1	17.2	80.5	0	4	16	4.67	3	0.77	1.71	8.6	7.1	1	0	1	0	1	1	2
1109081571	3	65	1	1	1	1	0	4	5	0	1	0	3	0	1	3	20	1	1	16.8	70.5	0	2	6	1.68	4.25	1.07	3	9.3	6.7	0	0	0	0	0	1	3
1109091571	4	70	0	1	0	1	0	2	3	0	0	0	2	0	1	1	20	1	1	7.1	77.5	1	3	12	3.04	3.5	0.71	2.1	7.3	6.6	1	0	1	0	1	1	3
1109101571	4	57	0	1	1	0	0	4	4	0	0	0	2	0	1	1	3	1	1	6.2	50.7	1	1	4	0.81	4.51	1.09	3.08	5.9	5.8	0	0	0	0	0	0	2
1109101572	4	64	0	1	1	1	0	2	3	0	0	0	2	0	1	2	25	0	1	14.4	341.6	0	3	12	2.34	4.5	0.69	3.32	10.1	9.9	1	0	1	0	1	1	3
1109111571	4	38	1	0	1	1	0	4	4	1	1	0	2	0	0	1	3	1	1	5.2	61.7	1	3	12	1.09	4.11	0.86	2.94	6.7	4.9	0	0	1	0	1	0	1
1109111572	3	42	0	1	1	1	0	4	3	0	1	0	2	1	1	3	0	0	1	17.2	33.7	0	6	18	1.76	5.53	0.94	4.15	11.9	2.5	1	1	1	1	1	1	1
1109111579	1	53	1	1	1	0	0	2	4	1	1	0	2	0	1	2	14	1	1	12.1	67.4	1	2	2	3.31	3.17	0.49	2.06	12.1	4.1	1	0	1	0	1	1	2
1109121571	4	54	1	1	1	0	0	3	4	1	1	0	2	0	1	1	8	1	1	8.3	67.6153	1	3	12	2.23	4.59	0.84	3.23	6.9	5.77802	1	0	1	0	1	0	2
1109141571	1	45	0	1	1	1	0	4	4	0	1	0	3	1	1	1	0	0	1	9.5	41.7	1	7	7	2.12	5.96	1.34	4.29	9.9	3.7	1	1	0	1	1	1	2
1109141572	4	41	1	1	1	0	0	3	4	1	1	0	3	0	0	2	1	1	1	15.3	45.7	1	2	8	2.17	4.83	1.18	3.23	11.4	4.3	1	0	0	0	1	1	1
1109141573	1	62	1	1	1	0	1	1	3	0	0	1	1	0	1	1	4	1	1	5.8	62.6	0	3	3	1.08	2.55	1.05	1.33	7	8	0	0	0	0	0	1	3
1109141579	1	58	1	1	1	1	0	3	4	0	1	0	2	0	1	3	13	1	1	18.8	192.5	1	2	2	3.52	11.28	1.65	8.92	11.9	9.98	1	1	1	1	1	1	2
1109231651	1	79	0	1	1	1	0	4	4	0	0	1	1	0	1	3	27	0	1	22.9	72.5	0	3	3	3.37	5.45	1.37	2.81	9.08664	9.9	1	1	0	0	1	1	3
1109231652	1	65	1	1	1	1	0	2	3	1	0	0	1	0	1	1	10	1	1	10.7	53.5	0	4	4	1.75	4.56	0.94	3.2	11.3	4.3	1	0	1	0	1	1	3
1109241571	2	60	1	1	1	1	0	4	4	0	1	0	1	0	1	1	20	1	1	4	78.6	1	3	6	0.47	3.22	1.24	1.83	7.8	6	0	0	0	0	0	1	3
1109251571	3	42	1	1	0	0	1	3	4	1	1	0	3	1	1	2	0	0	0	16.4	69.2	1	3	9	2.28	4.77	0.7	3.78	9.6	5.3	1	0	1	1	1	1	1
1109251651	2	56	1	1	1	1	0	4	4	1	1	0	2	0	1	1	1	1	1	8.7	47.9	1	4	8	2.21502	4.75798	1.09624	2.64482	7.5	5	1	0	0	0	1	1	2
1109261571	3	56	1	1	1	1	0	4	4	1	1	0	1	0	1	1	8	1	0	5.8	97.1	1	2	6	3.92	6.21	1.16	4.28	7.8	4.7	1	1	0	1	1	1	2
1109281571	1	78	1	0	1	0	1	2	3	0	0	0	3	1	1	1	0	0	0	6.6	108.8	1	3	3	0.81	4.04	1.11	2.62	6.6	8.2	0	0	0	0	0	0	3
1109281572	1	39	1	1	1	0	1	3	4	0	1	0	2	0	1	1	6	1	1	8.9	67.1	1	3	3	2.77	3.43	0.86	2.24	9.08664	3.9	1	0	1	0	1	1	1
1110101571	2	47	0	1	1	1	0	4	5	0	0	0	2	0	1	2	6	1	1	12.6	51.1	1	3	6	2.3	5.21	1.29	3.5	9.7	4.2	1	1	0	1	1	1	2
1110121571	3	63	0	1	0	1	0	2	3	0	0	1	1	0	0	1	4	1	1	9.8	59.8	1	2	6	3.52	4.36	0.99	2.71	7.3	5.2	1	0	1	0	1	1	3
1110121572	1	38	1	1	1	1	0	4	4	0	1	0	2	0	0	1	12	0	0	9.9	70.4	1	3	3	1.64	4.81	0.85	3.46	12.6	5.1	0	0	1	1	1	1	1
1110131571	1	58	1	1	1	0	0	3	4	0	1	0	3	0	1	1	8	1	1	9.6	79.3	1	2	2	1.51	3.58	0.78	2.48	9.2	5.5	0	0	1	0	1	1	2
1110131651	3	76	1	0	0	1	1	1	1	0	0	1	3	0	1	1	20	1	0	6.6	67.6153	0	3	9	0.92	2.83	0.79	1.85	7.4	5.77802	0	0	1	0	1	1	3
1110131652	4	70	1	1	0	0	0	3	3	0	0	0	2	0	0	1	20	1	1	10.8	53.5	0	2	8	2.76	3.71	0.99	2.54	9.8	6.9	1	0	1	0	1	1	3
1110131653	4	66	0	1	1	1	0	1	3	0	0	0	2	0	1	1	20	1	0	6.3	38.9	0	2	8	1.03	4.29	1.15	0.47	6.1	4.5	0	0	0	0	0	0	3
1110151651	1	35	1	1	1	0	0	4	4	1	1	0	3	0	1	1	5	1	1	7.2	67.6	1	2	2	2.21502	4.75798	1.09624	2.64482	7.8	5.1	1	0	0	0	1	1	1
1110171641	4	70	0	1	1	1	0	2	4	0	0	0	1	0	1	1	15	1	1	7.5	49.5	0	5	20	1.2	4.8	1.33	3.21	10.3	7.2	0	0	0	0	0	1	3
1110171642	4	71	1	0	1	0	1	3	4	0	0	0	2	0	0	2	6	1	1	11.95	73.1	1	2	8	2.21502	4.75798	1.09624	2.64482	7.7	5.5	1	0	0	0	1	1	3
1110171643	4	46	1	1	1	1	0	4	5	1	0	0	1	0	0	1	5	0	1	5.3	49.6	1	8	32	0.78	4.36	1.12	2.89	10.2	5	0	0	0	0	0	1	2
1110171644	1	51	1	1	1	0	0	3	5	0	1	0	1	0	1	1	2	1	0	6.1	73.1	0	10	10	0.84	4.1	0.93	2.86	5.2	6	0	0	1	0	1	0	2
1110191651	1	53	1	1	1	1	0	4	5	0	1	0	2	0	1	3	5	1	0	19.4	56.6	1	2	2	4.75	5.26	1.17	3.19	9.2	8.2	1	1	0	0	1	1	2
1110191652	2	51	0	1	1	1	0	3	4	0	0	0	1	0	1	2	4	1	0	16.4	41	1	2	4	1.06	5.2	1.06	3.9	11.9	4.8	0	1	0	1	1	1	2
1110211651	4	59	0	1	1	1	1	1	3	0	0	1	2	0	1	1	4	1	1	6.2	49.8	0	3	12	2.72	3.71	0.94	2.29	6.1	3.6	1	0	1	0	1	0	2
1110231571	#NULL!	#NULL!	#NULL!	#NULL!	#NULL!	#NULL!	#NULL!	#NULL!	#NULL!	#NULL!	#NULL!	#NULL!	#NULL!	#NULL!	#NULL!	#NULL!	#NULL!	#NULL!	#NULL!	#NULL!	#NULL!	#NULL!	#NULL!	#NULL!	#NULL!	#NULL!	#NULL!	#NULL!	#NULL!	#NULL!	#NULL!	#NULL!	#NULL!	#NULL!	#NULL!	1	3
1110231641	4	60	0	1	1	1	0	3	5	0	0	0	1	0	1	1	2	1	1	5.4	45.7	0	3	12	2.21502	4.75798	1.09624	2.64482	9.7	4.6	1	0	0	0	1	1	3
1110241571	1	25	1	1	0	0	0	4	4	0	1	0	3	1	1	3	0	0	0	19	59.1	0	4	4	7.48	5.98	1.17	3.77	13.2	4.6	1	1	0	1	1	1	1
1110251641	2	72	0	1	1	1	0	3	5	0	0	0	2	0	1	1	15	1	1	10.5	45.8	0	3	6	1.76	4	0.99	2.68	7.7	6	1	0	1	0	1	1	3
1110251642	3	49	1	1	1	1	1	2	4	0	0	0	2	1	1	1	0	1	0	5	106.3	1	3	9	2.88	2.94	0.76	1.84	5.3	7.8	1	0	1	0	1	0	2
1110251643	3	57	0	1	1	1	0	3	4	0	0	0	1	1	1	1	0	1	0	5.6	40	1	5	15	2.68	3.97	1.11	2.47	5.4	3.1	1	0	0	0	1	0	2
1110281571	1	44	1	1	1	1	0	3	3	1	1	0	1	0	0	1	3	1	1	7.1	54.6	1	2	2	2.24	5.11	1.09	3.42	7.2	5.8	1	0	0	1	1	1	1
1110301651	4	63	0	1	0	1	0	3	3	0	0	0	2	0	1	2	2	1	0	14.5	45.5	0	3	12	4.98	5.33	1.04	3.58	8.2	6	1	1	0	1	1	1	3
1110301652	2	57	1	0	1	1	0	3	4	1	1	0	2	0	1	1	17	0	0	9.1	63.4	1	2	4	3.05	2.73	0.9	1.38	7.3	3	1	0	1	0	1	1	2
1110301653	3	75	0	1	1	1	0	2	2	0	0	1	3	0	1	1	10	1	1	9.7	66.3	0	5	15	3.03	4.71	1.02	3.1	7.8	6.3	1	0	1	0	1	1	3
1111041571	1	56	1	0	1	0	0	3	4	0	1	0	3	0	1	1	12	1	1	10.6	55.2	1	2	2	6.99	6.67	1.13	4.05	8.6	4.2	1	1	0	1	1	1	2
1111041572	1	63	1	1	0	1	0	3	3	1	1	0	2	0	1	3	5	1	1	16.7	50	0	3	3	3.76	6.71	1.44	4.35	10.6	3.8	1	1	0	1	1	1	3
1111041641	1	27	1	1	0	0	0	4	5	0	0	0	2	0	0	3	6	1	0	17.6	44.9	1	4	4	0.51	3.21	1.71	1.39	8.2	3.2	0	0	1	0	1	1	1
1111041642	3	64	0	1	1	1	0	2	5	0	0	0	1	1	1	1	0	0	0	11.1	39.4	0	3	9	1.47	6.4	1.3	4.44	11.9	5.2	0	1	0	1	1	1	3
1111041643	4	79	0	1	0	0	0	1	4	0	0	0	2	0	0	1	31	1	1	6.9	61.9	0	2	8	0.87	3.52	1.26	1.98	7	7.5	0	0	0	0	0	1	3
1111041644	4	56	0	0	1	1	0	3	4	0	0	0	1	0	0	2	8	1	0	12.1	32.9	1	1	4	1.02	3.56	1	2.35	10.7	3.7	0	0	1	0	1	1	2
1111041651	1	40	1	1	1	1	0	4	4	1	0	0	3	1	1	1	0	1	1	9.4	61.6	1	2	2	2.21502	4.75798	1.09624	2.64482	11.8	2.9	1	0	0	0	1	1	1
1111041652	4	67	0	1	0	1	1	1	2	0	0	0	1	0	1	1	5	1	1	9.1	51.6	0	3	12	0.78	3.35	1.11	2.05	6.9	2.2	0	0	0	0	0	0	3
1111041653	4	56	0	1	1	1	1	2	3	0	0	0	2	0	1	1	5	1	1	5.2	66.2	1	2	8	1.69	6.59	1.65	4.25	5.8	4.5	0	1	1	1	1	0	2
1111051571	3	57	0	1	1	1	0	4	4	0	0	0	2	0	1	1	3	1	1	10.7	62.8	1	1	3	1.55	4	1.26	2.37	8.2	4.8	0	0	0	0	0	1	2
1111051572	4	57	0	0	1	0	1	1	3	0	0	0	3	0	1	3	6	1	1	20.4	71.4	1	2	8	0.66	4.4	1.34	2.7	7.6	7.5	0	0	0	0	0	1	2
1111051573	1	47	1	1	1	0	1	3	2	1	0	0	1	0	0	3	12	1	1	37.1	48.9	1	3	3	4.75	4.69	1.21	2.84	13.2	5.8	1	0	0	0	1	1	2
1111061571	1	76	0	0	1	0	1	1	2	0	0	1	2	0	1	1	2	0	1	8.3	58.2	1	1	1	0.85	3.24	1.14	1.84	9.9	8.9	0	0	0	0	0	1	3
1111061572	1	56	1	1	1	1	0	4	5	1	1	0	1	0	0	1	8	1	1	7.7	64.2	1	4.84314	4.84314	0.88	2.23	0.66	1.43	7.8	6.5	0	0	1	0	1	1	2
1111081641	4	55	0	1	1	1	0	3	4	0	0	0	2	0	0	1	5	1	1	8.7	70.5	1	2	8	0.5	3.36	1.14	2.11	8.6	4.3	0	0	0	0	0	1	2
1111131571	1	28	0	1	1	0	0	3	4	0	0	0	2	0	0	2	3	0	0	16	38.4	0	3	3	2.21502	4.75798	1.09624	2.64482	10.4	4	1	0	0	0	1	1	1
1111141641	4	67	0	1	1	0	1	1	4	0	0	1	3	0	0	2	5	1	1	13.3	51.3	0	5	20	2.5	5.93	1.08	4.19	9.4	5	1	1	0	1	1	1	3
1111141651	1	53	1	1	1	0	1	2	3	0	0	0	2	0	1	1	18	1	1	8.2	56.2	1	2	2	0.91	5.05	1.44	3.15	7.4	5.7	0	0	0	0	0	1	2
1111151641	4	58	1	0	1	1	0	4	5	0	0	0	2	0	1	2	15	1	1	11.5	73.5	1	3	12	1.03	3.76	1.07	2.39	6.7	6.2	0	0	0	0	0	0	2
1111161571	1	49	1	1	1	1	1	3	4	1	1	0	3	0	1	1	6	1	0	9	65.9	1	2	2	2.81	4.81	1.02	3.31	8.1	5.6	1	0	1	0	1	1	2
1111161579	1	77	0	0	0	0	1	1	3	0	0	1	3	0	1	1	16	0	1	11	60.8	0	1	1	0.93	3.44	1.06	2.12	7.7	5.6	0	0	0	0	0	1	3
1111161651	1	41	1	1	1	0	0	2	2	1	0	0	2	0	1	1	2	1	0	9.4	69.6	1	2	2	2.49	6.79	1.33	4.61	7.2	3.8	1	1	0	1	1	1	1
1111161652	3	55	0	1	1	1	0	4	4	0	0	1	3	0	0	1	6	1	1	9.1	52.2	0	5	15	2.34	4.42	0.79	3.12	7.2	4.9	1	0	1	0	1	1	2
1111161658	1	39	1	1	1	0	0	4	4	0	0	0	1	0	1	3	11	1	1	19.9	57.2	1	3	3	2.55	4.45	0.87	2.97	11.9	6.3	1	0	1	0	1	1	1
1111161659	4	62	0	0	1	0	1	1	2	0	0	1	1	0	0	2	9	1	1	15.9	39.8	0	2	8	2.08	6.52	1.24	4.6	1.2	4.3	1	1	0	1	1	0	3
1111171571	1	77	0	1	1	1	0	3	3	0	0	1	1	0	1	3	16	1	1	22	50.4	0	1	1	1.93	5.12	1.32	3.37	11.6	5.1	1	0	0	1	1	1	3
1111171641	4	54	0	1	1	1	0	4	5	0	0	0	1	1	0	2	0	1	1	14.5	40.6	0	4	16	3.97	5.15	1.04	3.39	10.5	6.5	1	0	0	1	1	1	2
1111171642	3	58	1	1	1	1	0	3	5	1	0	0	2	0	1	3	20	1	1	20.3	72.7	0	4	12	0.88	2.89	0.8	1.89	8.1	6.8	0	0	1	0	1	1	2
1111171643	3	54	0	1	0	1	0	3	5	0	0	1	3	0	0	2	6	1	1	14.3	35.8	1	2	6	3.3	4.09	0.91	2.69	7.9	6.5	1	0	1	0	1	1	2
1111201571	2	36	1	1	1	1	0	4	4	1	1	0	2	0	1	1	6	1	1	8.7	56.1	1	2	4	3.33	4.24	0.96	2.69	7.1	5.6	1	0	1	0	1	1	1
1111201572	1	48	1	1	1	1	0	3	4	0	1	0	3	0	0	1	1	1	1	8.15	65.1	1	3	3	3.66	3.8	0.8	2.35	6.9	5.9	1	0	1	0	1	0	2
1111201573	1	71	0	1	1	0	1	2	3	0	0	1	1	0	1	2	2	0	1	16.2	39.6	0	2	2	1.68	3.12	0.89	1.89	11.5	4.9	0	0	1	0	1	1	3
1111201651	4	75	1	1	1	1	0	4	4	1	0	0	2	0	0	1	20	1	1	7.6	63.1	1	4	16	2.94	4.29	0.88	2.85	6.9	4.8	1	0	1	0	1	0	3
1111241651	3	54	1	1	1	0	1	2	2	0	0	0	3	0	1	1	3	1	0	9.7	71.3	1	6	18	1.45	4.54	1.01	3.11	10.2	3.7	0	0	1	0	1	1	2
1111261651	2	49	1	1	1	1	0	4	5	1	1	0	3	0	1	1	2	1	1	6.3	55.4	1	6	12	7.06	5.04	0.92	2.85	6.8	4.4	1	0	1	0	1	0	2
1111261652	3	44	0	0	1	1	0	4	3	0	0	0	1	0	0	2	10	1	1	12.7	48	1	6	18	2.19	5.8	1.24	3.97	8.5	4.6	1	1	0	1	1	1	1
1111261653	3	54	1	1	1	1	0	4	4	0	0	0	3	0	1	2	3	1	1	12.3	52.5	1	5	15	5.44	4.34	0.78	2.73	9.2	4.1	1	0	1	0	1	1	2
1111261654	4	49	0	0	1	0	1	1	1	0	0	0	2	1	1	1	0	0	0	8.3	42.1	0	5	20	3.12	7.7	1.38	5.42	8.5	3.7	1	1	0	1	1	1	2
1111261655	4	43	1	1	1	1	0	3	4	1	0	0	1	0	1	2	8	1	1	11.5	66.3	1	4	16	3.31	4.81	0.89	3.07	9	4.1	1	0	1	0	1	1	1
1111261656	4	53	0	0	1	1	0	3	3	0	0	0	3	0	1	1	17	1	0	8.4	67.6153	0	4	16	2.21502	4.75798	1.09624	2.64482	8.5	5.77802	1	0	0	0	1	1	2
1111261657	1	36	0	0	1	0	1	1	2	0	0	0	1	0	0	1	1	1	0	7.5	36.9	1	4	4	0.59	3.32	1.1	1.93	5.9	2.6	0	0	0	0	0	0	1
1112271501	4	55	1	1	1	0	1	4	4	0	0	1	2	0	1	1	4	1	1	9.1	62	1	6	24	2.9	5.67	0.99	3.63	9.8	5.8	1	1	1	1	1	1	2
1112281501	4	50	1	1	1	0	1	2	2	1	1	0	2	0	0	2	2	1	1	14.3	57.2	1	4	16	4.62	4.54	0.89	2.72	12.6	4.6	1	0	1	0	1	1	2
1201061431	1	58	0	0	1	0	1	2	2	0	0	1	1	0	1	2	1	1	0	14.27	55	0	3	3	2.19	6.87	1.42	4.45	10.7	7.14	1	1	0	1	1	1	2
1201081441	1	40	1	0	1	0	1	3	2	1	1	0	2	0	1	2	1	1	1	13.93	47	1	8	8	9.29	7.26	1.69	1.35	15.7	2.91	1	1	1	0	1	1	1
1201161461	1	48	1	0	1	1	0	3	3	1	0	0	1	0	1	2	7	1	1	15.15	59	0	6	6	1.45	4.9	1.11	3.13	10.9	3.34	0	0	0	0	0	1	2
1201201441	2	77	0	0	1	0	1	1	1	0	0	1	1	0	1	3	4	1	1	19.85	112	0	6	12	3.13	2.93	0.83	0.68	14.4	6.06	1	0	1	0	1	1	3
1204271431	1	69	1	1	1	0	0	1	2	0	0	1	2	0	1	1	6	0	1	7.77	82	0	4	4	2.58	5.89	1.13	3.59	6.5	4.36	1	1	0	1	1	0	3
1204281431	1	76	0	1	1	0	1	1	2	0	0	1	2	0	1	1	1	1	1	7.94	105	0	3	3	3.09	5.35	1.04	2.91	6.9	7	1	1	0	0	1	0	3
1204281451	1	66	1	0	1	1	1	1	1	0	0	0	2	0	1	1	2	1	1	8.23	61	0	7	7	1	5.02	0.92	3.65	11.4	4.15	0	0	1	1	1	1	3
1205091451	1	51	0	0	0	0	1	1	1	0	0	0	1	0	0	1	1	1	1	9.36	53	1	5	5	3.65	5.48	1.19	2.63	7.9	3.71	1	1	0	0	1	1	2
1205111451	2	43	0	1	1	1	0	4	4	0	0	0	1	0	0	2	5	1	1	11.45	46	0	10	20	0.41	5.1	1.59	3.32	12.9	4.87	0	0	1	0	1	1	1
1205111461	3	68	1	0	1	0	1	1	3	0	0	0	2	0	1	1	2	1	0	9.06	69	1	5	15	4.23	5.03	0.94	2.17	9.8	5.55	1	0	1	0	1	1	3
1205161431	1	57	1	1	1	1	1	3	3	0	0	0	2	0	1	3	10	1	1	18.3	56.5	1	4	4	0.92	5.56	1.12	4.59	11	5.42	0	1	0	1	1	1	2
1205161439	1	57	0	1	1	0	1	1	2	0	0	1	2	0	1	2	1	1	1	16.38	50	0	3	3	1.54	7.23	1.5	4.56	13	7.78	0	1	0	1	1	1	2
1205271461	#NULL!	#NULL!	#NULL!	#NULL!	#NULL!	#NULL!	#NULL!	#NULL!	#NULL!	#NULL!	#NULL!	#NULL!	#NULL!	#NULL!	#NULL!	#NULL!	#NULL!	#NULL!	#NULL!	#NULL!	#NULL!	#NULL!	#NULL!	#NULL!	#NULL!	#NULL!	#NULL!	#NULL!	#NULL!	#NULL!	#NULL!	#NULL!	#NULL!	#NULL!	#NULL!	1	3
1205281461	1	77	1	0	1	0	1	2	1	0	0	1	2	0	1	3	10	1	1	17.74	63	0	10	10	0.86	2.56	0.91	1.26	7.2	5.61	0	0	1	0	1	1	3
1206041441	2	69	0	1	1	0	1	1	2	0	0	1	2	0	0	1	7	1	1	7.69	59	1	6	12	1.85	4.58	1.14	2.6	5.6	3.02	1	0	0	0	1	0	3
1206191461	1	64	1	1	1	1	0	3	4	0	0	1	2	0	1	1	14	1	1	8.38	118	1	2	2	0.8	2.61	0.82	1.43	6.4	5.73	0	0	1	0	1	0	3
1207011461	#NULL!	#NULL!	#NULL!	#NULL!	#NULL!	#NULL!	#NULL!	#NULL!	#NULL!	#NULL!	#NULL!	#NULL!	#NULL!	#NULL!	#NULL!	#NULL!	#NULL!	#NULL!	#NULL!	#NULL!	#NULL!	#NULL!	#NULL!	#NULL!	#NULL!	#NULL!	#NULL!	#NULL!	#NULL!	#NULL!	#NULL!	#NULL!	#NULL!	#NULL!	#NULL!	1	3
1207011462	1	80	0	1	1	0	1	1	2	0	0	1	3	0	1	1	6	1	1	4.56	75	0	10	10	2.96	5.63	0.85	3.43	5.2	4.18	1	1	1	1	1	0	3
1207061461	#NULL!	#NULL!	#NULL!	#NULL!	#NULL!	#NULL!	#NULL!	#NULL!	#NULL!	#NULL!	#NULL!	#NULL!	#NULL!	#NULL!	#NULL!	#NULL!	#NULL!	#NULL!	#NULL!	#NULL!	#NULL!	#NULL!	#NULL!	#NULL!	#NULL!	#NULL!	#NULL!	#NULL!	#NULL!	#NULL!	#NULL!	#NULL!	#NULL!	#NULL!	#NULL!	1	3
1207061462	#NULL!	#NULL!	#NULL!	#NULL!	#NULL!	#NULL!	#NULL!	#NULL!	#NULL!	#NULL!	#NULL!	#NULL!	#NULL!	#NULL!	#NULL!	#NULL!	#NULL!	#NULL!	#NULL!	#NULL!	#NULL!	#NULL!	#NULL!	#NULL!	#NULL!	#NULL!	#NULL!	#NULL!	#NULL!	#NULL!	#NULL!	#NULL!	#NULL!	#NULL!	#NULL!	1	3
1207061463	#NULL!	#NULL!	#NULL!	#NULL!	#NULL!	#NULL!	#NULL!	#NULL!	#NULL!	#NULL!	#NULL!	#NULL!	#NULL!	#NULL!	#NULL!	#NULL!	#NULL!	#NULL!	#NULL!	#NULL!	#NULL!	#NULL!	#NULL!	#NULL!	#NULL!	#NULL!	#NULL!	#NULL!	#NULL!	#NULL!	#NULL!	#NULL!	#NULL!	#NULL!	#NULL!	1	3
1207091431	1	75	1	0	1	0	1	1	2	0	0	0	2	0	1	3	18	1	1	29.39	68	1	3	3	0.85	4.54	1.37	2.78	12.7	5.93	0	0	0	0	0	1	3
1207111461	1	68	0	0	1	0	1	1	3	0	0	1	1	0	1	3	10	1	1	20.28	46	0	4	4	1.06	4.85	1.13	3.24	15.5	5.66	0	0	0	0	0	1	3
1207151451	1	71	1	0	1	1	0	2	4	0	0	0	2	0	0	2	10	1	1	15.13	81	1	10	10	2.15	3.15	0.96	1.21	10.7	8.08	1	0	1	0	1	1	3
1207161441	1	78	0	1	1	0	1	1	2	0	0	1	2	0	1	1	3	1	0	6.91	147	0	6	6	1.07	4.63	0.89	3.25	7.4	7.24	0	0	1	0	1	1	3
1207171461	#NULL!	#NULL!	#NULL!	#NULL!	#NULL!	#NULL!	#NULL!	#NULL!	#NULL!	#NULL!	#NULL!	#NULL!	#NULL!	#NULL!	#NULL!	#NULL!	#NULL!	#NULL!	#NULL!	#NULL!	#NULL!	#NULL!	#NULL!	#NULL!	#NULL!	#NULL!	#NULL!	#NULL!	#NULL!	#NULL!	#NULL!	#NULL!	#NULL!	#NULL!	#NULL!	1	3
1207261441	1	40	1	0	1	0	1	2	2	0	0	0	2	0	1	1	1	0	1	8.73	72	1	2	2	1.22	5.39	1.26	3.58	9.08664	6.32	0	1	0	1	1	1	1
1208011441	1	68	0	0	1	0	1	1	2	0	0	0	1	0	0	1	1	0	0	6.72	76	0	3	3	0.84	3.74	0.98	2.38	5.9	4.45	0	0	1	0	1	0	3
1208031441	1	45	1	0	1	0	1	3	2	0	0	0	3	0	1	2	4	1	1	13.24	115	1	6	6	3.81	6.54	1.35	3.46	7	11.35	1	1	0	1	1	1	2
1208031461	#NULL!	#NULL!	#NULL!	#NULL!	#NULL!	#NULL!	#NULL!	#NULL!	#NULL!	#NULL!	#NULL!	#NULL!	#NULL!	#NULL!	#NULL!	#NULL!	#NULL!	#NULL!	#NULL!	#NULL!	#NULL!	#NULL!	#NULL!	#NULL!	#NULL!	#NULL!	#NULL!	#NULL!	#NULL!	#NULL!	#NULL!	#NULL!	#NULL!	#NULL!	#NULL!	1	3
1208041461	1	70	0	0	1	0	1	1	2	0	0	1	3	0	1	3	2	1	1	28.15	16	0	7	7	1.68	2.8	0.61	1.43	11.5	9.85	0	0	1	0	1	1	3
1208041462	1	69	1	0	1	1	0	4	4	0	0	0	1	1	1	2	0	1	1	12.22	79	0	3	3	2.26	6.12	0.91	4.18	9.08664	5.04	1	1	1	1	1	1	3
1208051442	1	60	1	0	1	0	1	2	2	0	0	0	1	0	1	1	10	1	1	6.33	117	1	6	6	1.54	5.78	1.03	4.05	5.4	4.95	0	1	1	1	1	0	3
1208051461	1	60	1	0	1	0	1	3	3	0	0	0	2	0	1	1	1	1	1	6.38	81	0	6	6	7.4	5.69	1.21	1.12	4.4	7.75	1	1	0	0	1	0	3
1208061431	4	67	0	0	1	1	0	3	3	0	0	0	1	0	1	1	9	1	1	6.81	54	0	5	20	1.67	4.03	1.02	2.25	6.8	7.39	0	0	1	0	1	0	3
1208101441	2	52	1	0	1	0	1	3	2	0	0	0	1	0	1	1	2	1	0	6.41	54	1	6	12	4.18	5.02	1.33	2.8	6.7	6.52	1	0	0	0	1	0	2
1208121431	1	84	0	0	1	0	1	1	1	0	0	0	2	0	1	2	20	1	1	13.78	85	1	10	10	2.41	4.17	0.98	2.09	8.7	5.56	1	0	1	0	1	1	3
1208121432	1	60	0	1	1	0	1	3	2	0	0	0	3	0	1	1	6	1	0	5.18	62	1	5	5	3.12	5.47	0.95	3.1	4.5	5.68	1	1	1	0	1	0	3
1208121441	1	47	1	0	1	0	1	3	2	0	0	0	1	0	1	1	12	1	1	8	124	1	6	6	2.84	5.38	1.01	3.08	8.9	11.38	1	1	1	0	1	1	2
1208131441	1	71	0	1	1	0	1	1	3	0	0	0	1	0	1	1	1	1	0	3.89	50	1	8	8	1.11	3.91	0.81	2.6	4.5	2.97	0	0	1	0	1	0	3
1208131442	2	58	0	1	1	0	1	1	3	0	0	0	2	0	1	1	3	1	1	4.96	59	1	12	24	0.95	4.09	1.5	2.16	4.9	6.76	0	0	0	0	0	0	2
1208141461	#NULL!	#NULL!	#NULL!	#NULL!	#NULL!	#NULL!	#NULL!	#NULL!	#NULL!	#NULL!	#NULL!	#NULL!	#NULL!	#NULL!	#NULL!	#NULL!	#NULL!	#NULL!	#NULL!	#NULL!	#NULL!	#NULL!	#NULL!	#NULL!	#NULL!	#NULL!	#NULL!	#NULL!	#NULL!	#NULL!	#NULL!	#NULL!	#NULL!	#NULL!	#NULL!	1	3
1208141462	2	61	0	1	1	0	1	3	3	0	0	0	2	0	1	1	1	0	0	7.78	61	0	3	6	2.89	5.63	1.13	3.19	6.2	4.39	1	1	0	0	1	0	3
1208161431	1	45	1	1	1	0	1	3	3	0	0	0	2	0	1	2	1	1	0	15.2	61	1	3	3	1.82	5.01	0.91	3.27	7.5	5.7	1	0	1	0	1	1	2
1208191431	2	70	0	0	1	1	1	2	2	0	0	1	3	0	1	1	10	1	1	9.53	58	0	4	8	3.72	6.05	1.77	2.59	9.1	7.64	1	1	1	0	1	1	3
1208271441	1	40	1	1	1	0	1	3	2	0	0	0	1	0	1	1	1	1	1	6.51	74	1	4	4	1.22	4.96	1.01	3.4	4.3	8.31	0	0	1	1	1	0	1
1208271442	1	53	0	0	1	0	1	2	1	0	0	0	2	0	1	2	8	1	1	16.13	58	1	6	6	1.89	5.11	1.13	3.12	10.6	6.2	1	0	0	0	1	1	2
1209071441	1	74	0	0	1	0	1	1	2	0	0	1	1	0	1	1	5	1	1	7.17	49	1	8	8	1.45	6.49	1.45	4.38	8.9	4.65	0	1	0	1	1	1	3
1209071442	2	41	1	1	1	0	1	3	2	0	0	0	2	0	0	1	0	1	1	6.95	61	1	8	16	2.7	3.8	0.88	1.69	4.6	2.81	1	0	1	0	1	0	1
1209161461	#NULL!	#NULL!	#NULL!	#NULL!	#NULL!	#NULL!	#NULL!	#NULL!	#NULL!	#NULL!	#NULL!	#NULL!	#NULL!	#NULL!	#NULL!	#NULL!	#NULL!	#NULL!	#NULL!	#NULL!	#NULL!	#NULL!	#NULL!	#NULL!	#NULL!	#NULL!	#NULL!	#NULL!	#NULL!	#NULL!	#NULL!	#NULL!	#NULL!	#NULL!	#NULL!	1	3
1209161462	#NULL!	#NULL!	#NULL!	#NULL!	#NULL!	#NULL!	#NULL!	#NULL!	#NULL!	#NULL!	#NULL!	#NULL!	#NULL!	#NULL!	#NULL!	#NULL!	#NULL!	#NULL!	#NULL!	#NULL!	#NULL!	#NULL!	#NULL!	#NULL!	#NULL!	#NULL!	#NULL!	#NULL!	#NULL!	#NULL!	#NULL!	#NULL!	#NULL!	#NULL!	#NULL!	1	3
1209181431	1	58	0	1	1	0	1	1	1	0	0	1	2	0	0	1	7	0	0	9.26	50	1	3	3	2.08	3.95	1.16	1.84	10.8	4.87	1	0	0	0	1	1	2
1209211441	2	54	1	0	1	0	1	2	2	0	0	0	1	0	1	1	10	1	1	10.3	69	1	1	2	1.52	3.11	0.82	1.6	7	4.14	0	0	1	0	1	1	2
1209211442	2	62	1	1	1	0	1	3	2	0	0	1	1	0	1	1	8	1	1	6.89	69	1	5	10	1.36	3.2	0.94	1.64	7.2	4.19	0	0	1	0	1	1	3
1209231431	3	67	0	1	1	0	1	3	2	0	0	0	2	0	0	2	20	1	1	12.56	45	1	4	12	2.34	5.47	1.11	3.3	9.8	3.64	1	1	0	0	1	1	3
1209261431	1	49	1	1	1	0	1	1	2	0	0	1	2	0	1	2	10	1	1	12.3	67	1	4	4	1.78	5.04	0.88	3.35	10.1	4.26	1	0	1	0	1	1	2
1209271441	2	54	1	0	1	0	1	2	2	0	0	0	1	1	0	3	0	1	1	35.16	73	1	6	12	1.48	2.19	0.68	0.84	15.6	6.42	0	0	1	0	1	1	2
1209271442	1	68	1	1	1	0	1	2	2	0	0	0	2	0	1	1	22	1	1	6.62	141	1	6	6	0.94	2.6	0.8	1.37	9.08664	6.06	0	0	1	0	1	1	3
1209291431	1	80	1	1	1	0	1	1	2	0	0	1	2	0	0	2	11	1	1	16.32	68	0	4	4	2.4	5.01	1.1	2.82	8.1	4.16	1	0	0	0	1	1	3
1209291451	4	62	1	1	1	0	1	2	2	1	1	0	2	0	1	2	11	1	1	12.52	66	1	1	4	4.21	5.94	1.77	2.26	8.1	3.57	1	1	1	0	1	1	3
1209301431	1	54	0	0	1	0	1	1	2	0	0	1	1	0	0	3	4	1	1	22.53	62	1	5	5	2.15	3.92	1.44	1.5	10.1	5.8	1	0	0	0	1	1	2
1210061431	1	85	1	0	1	0	1	1	2	0	0	1	2	0	0	3	4	1	1	19.07	103	0	5	5	1.54	4.12	1.23	2.5	10.1	12.4	0	0	0	0	0	1	3
1210061439	2	52	0	0	1	0	1	2	2	0	0	0	2	0	1	1	2	1	1	7.55	67	1	3	6	3.75	5.57	1.16	4.2	6.4	5.34	1	1	0	1	1	0	2
1210091431	2	45	1	1	1	0	1	3	2	0	0	0	2	0	1	3	1	1	0	30.23	85	1	4	8	2.36	5.23	1.18	3.5	13.5	3.86	1	1	0	1	1	1	2
1210101431	1	75	0	0	1	0	1	1	2	0	0	1	2	0	1	2	6	1	1	13.28	79	1	4	4	4.6	8.91	1.32	5.49	8.1	9.99	1	1	0	1	1	1	3
1210111431	1	81	1	0	1	0	1	1	2	0	0	1	1	0	1	1	3	1	1	9.22	85	1	6	6	1.57	4.31	1.01	3	7.3	9.47	0	0	1	0	1	1	3
1210111432	1	72	0	1	1	0	1	1	2	0	0	1	2	0	1	1	10	1	1	7.89	61	0	6	6	5.17	6.72	1.34	4.1	4	2.21	1	1	0	1	1	0	3
1210111461	1	70	1	0	1	0	1	2	2	1	0	0	1	0	1	1	10	1	1	6.75	72	1	5	5	1.09	3.62	0.85	2.6	11.2	6.05	0	0	1	0	1	1	3
1210121431	2	79	0	0	1	0	1	2	1	0	0	1	2	0	1	2	3	1	1	12.44	82	0	3	6	1.22	5.79	0.89	4.35	10.7	2.69	0	1	1	1	1	1	3
1210151451	1	80	0	0	1	0	1	2	2	0	0	1	1	1	1	3	0	1	1	37.42	94	1	2	2	2.13	5.83	1.36	4.1	9.8	12.74	1	1	0	1	1	1	3
1210211431	1	85	1	1	1	0	1	1	2	0	0	1	2	0	1	1	7	0	1	11.07	136	0	5	5	1.11	4.37	1.36	2.6	10.1	15.95	0	0	0	0	0	1	3
1210221431	2	46	1	0	1	1	1	3	3	0	0	0	2	0	0	1	3	1	1	10.02	66	1	4	8	1.41	4.45	0.95	3.2	7.6	3.36	0	0	1	0	1	1	2
1210231451	2	51	1	1	1	0	1	2	4	1	0	0	3	0	1	1	23	0	1	5.33	217	1	4	8	1.57	3.84	1.02	2.4	5.1	12.74	0	0	1	0	1	0	2
1211011451	1	70	0	1	1	0	1	2	2	0	0	0	2	0	1	1	10	0	1	8.67	59	0	6	6	6.75	5.04	1.44	1.8	9.5	3.55	1	0	0	0	1	1	3
1211101451	1	78	0	0	1	0	1	1	2	0	0	1	3	1	1	3	0	1	0	27.54	175	0	6	6	5.44	5.46	1.32	2.9	13.2	9.98	1	1	0	0	1	1	3
1211151451	4	58	1	1	1	1	0	4	4	0	0	0	2	0	1	1	18	0	1	6.49	120	1	1	4	5.48	7	1.51	3.6	6	12.02	1	1	0	1	1	0	2
1211181461	2	65	0	0	1	0	1	1	2	0	0	0	3	0	1	1	5	1	0	7.81	56	1	3	6	2.17	4.65	1.13	2.8	5	5.72	1	0	0	0	1	0	3
1211201461	2	55	0	0	1	0	0	2	4	0	0	0	1	0	1	2	10	0	1	14.44	39	1	2	4	1.59	4.36	1.23	2.6	11.4	5.39	0	0	0	0	0	1	2
1211211451	1	58	0	0	1	0	0	4	5	0	0	0	1	0	1	1	3	1	1	6.68	56	0	8	8	0.94	3.68	1.39	1.9	5.6	3.53	0	0	0	0	0	0	2
1211211452	1	66	1	0	1	0	1	3	1	0	0	0	1	0	1	1	4	1	1	7.17	93	1	6	6	0.42	3.63	1.64	1.7	6.3	5.19	0	0	1	0	1	0	3
1211211453	2	69	0	1	0	1	0	4	5	0	0	0	3	0	1	1	2	1	1	9.8	66	1	6	12	3.36	5.66	1.53	3.1	6.5	5.7	1	1	0	0	1	0	3
1211221451	1	47	1	0	0	1	0	4	5	0	0	0	2	0	1	1	0	1	0	6.97	67	1	6	6	2.02	4.19	0.99	2.7	5.9	5.69	1	0	1	0	1	0	2
1211221452	1	77	1	1	1	1	1	3	4	0	1	0	1	1	1	2	0	1	1	12.31	79	0	6	6	1.71	3.3	0.84	2.1	8.7	7.87	1	0	1	0	1	1	3
1211221453	1	56	1	1	1	0	1	3	4	0	1	0	2	0	1	1	10	1	1	10.55	68	1	4	4	3.61	5.96	1.15	3.8	8.4	7.11	1	1	0	1	1	1	2
1212051431	1	48	1	0	1	0	0	1	3	0	0	0	1	0	0	1	9	0	1	10.57	71	1	2	2	3.26	4.64	0.93	2.23	11.2	4.9	1	0	1	0	1	1	2
1212051441	1	39	1	1	1	0	1	3	3	0	1	0	3	1	1	1	1	1	1	6.51	74	1	4	4	1.22	4.96	1.01	3.4	14.2	8.31	0	0	1	1	1	1	1
1212071461	1	70	1	1	1	0	1	2	1	0	0	0	1	0	1	1	5	1	0	4.9	69	0	2	2	1.32	4.18	0.81	2.77	8	4.05	0	0	1	0	1	1	3
1212111431	1	58	1	0	1	0	1	3	3	0	0	1	1	0	1	3	10	1	1	18.05	70	0	4	4	1.79	3.75	0.7	2.24	12.9	5.09	1	0	1	0	1	1	2
1212131431	1	37	1	1	1	1	0	4	4	0	0	0	1	0	1	1	6	1	1	10.59	62	0	2	2	3.96	4.21	0.95	1.46	10.3	4	1	0	1	0	1	1	1
1212131441	2	37	1	0	1	1	1	2	2	0	0	1	2	0	1	1	1	1	1	7.34	90	0	6	12	1.32	5.69	1.72	3.37	5.4	7.06	0	1	1	1	1	0	1
1212171441	1	64	0	0	1	0	1	1	2	0	0	1	2	0	1	1	12	1	1	10.07	71	0	6	6	2.3	4.89	1.1	2.74	10.2	7.01	1	0	0	0	1	1	3
1212171461	1	61	1	1	1	1	0	4	5	0	0	1	2	0	1	1	16	1	1	6.47	85	0	3	3	1.81	2.9	0.74	1.34	8.7	4.81	1	0	1	0	1	1	3
1212201441	2	60	1	0	1	0	1	2	2	0	0	1	2	0	1	1	4	1	1	5.46	99	1	6	12	0.79	3.72	1.03	2.33	5.8	7.01	0	0	1	0	1	0	3
1212241461	4	70	0	0	0	1	1	1	2	0	0	0	3	0	1	1	12	1	1	10.93	44	1	5	20	1.7	7.51	1.45	5.29	8.2	6.25	1	1	0	1	1	1	3
1212251431	1	70	0	1	1	0	0	1	2	0	0	1	2	0	1	1	10	1	1	10.38	50	0	4	4	1.65	3.82	1.01	2.06	8.8	7.37	0	0	1	0	1	1	3
1212261431	1	61	1	1	1	1	0	3	3	0	0	1	1	0	1	2	4	1	1	13.02	8.9	0	3	3	2.48	4.59	0.98	2.48	9.5	8.9	1	0	1	0	1	1	3
1212261441	1	75	0	1	1	0	1	1	2	0	0	1	1	0	1	2	15	1	1	15.29	53	1	10	10	1.41	6.15	1.57	3.94	13.1	4.58	0	1	1	1	1	1	3
1212301431	1	68	0	1	1	0	0	1	2	0	0	1	2	0	1	1	1	0	1	10.11	53	0	3	3	2.01	6.56	1.19	4.46	9.4	4.51	1	1	0	1	1	1	3
1501041371	4	59	0	0	1	0	1	1	1	0	0	1	2	0	1	1	11	1	1	7.56	65.3	1	3	12	2.49	7.1	1.29	3.96	9.4	5.65	1	1	0	1	1	1	2
1501041372	4	33	1	1	1	1	0	3	4	1	1	0	1	0	0	2	8	1	0	16.52	43.6	1	4	16	1.57	3.94	1.09624	2.64482	11.7	5.52	0	0	0	0	0	1	1
1501041373	4	70	0	1	1	0	1	2	1	0	0	1	1	0	1	1	16	1	1	10.6736	67.6153	1	4	16	2.21502	4.75798	1.09624	2.64482	10.8	5.77802	1	0	0	0	1	1	3
1501071371	4	30	0	0	1	0	1	2	2	0	0	1	3	0	1	1	1	1	0	10.58	61.3	1	3	12	4.48	4.74	1.09624	2.64482	8.2	3.07	1	0	0	0	1	1	1
1501071372	4	45	1	1	1	1	0	3	3	0	0	0	2	0	1	1	7	1	0	7.55	49.7	1	4	16	1.48	3.41	1	1.92	10.7	7.04	0	0	1	0	1	1	2
1501071373	4	55	0	1	1	1	0	4	4	0	0	1	1	0	0	1	9	1	0	3.22	57.6	1	4	16	0.48	4.54	1.89	2.25	8.1	7.35	0	0	1	0	1	1	2
1501091351	4	60	1	1	1	1	0	3	3	0	1	1	1	0	1	1	22	1	0	5.17	50.2	1	5	20	1.31	3.6	0.79	2.25	7.7	9.2	0	0	1	0	1	1	3
1501091352	4	69	1	1	1	1	0	3	4	0	0	0	3	0	1	1	17	1	0	10.5	67.6153	1	3	12	2.21502	4.75798	1.09624	2.64482	9.08664	5.77802	1	0	0	0	1	1	3
1501091353	1	65	0	1	1	0	1	1	2	0	0	0	1	0	0	1	5	1	0	5.8	47.2	0	6	6	0.78	4.22	2.24	1.59	9.08664	5	0	0	1	0	1	1	3
1501110724	1	53	1	1	1	1	0	4	2	1	0	0	3	0	1	1	15	1	0	9.9	67.6153	0	8	8	2.21502	4.75798	1.09624	2.64482	8.8	5.77802	1	0	0	0	1	1	2
1501141341	4	62	0	1	1	1	0	4	4	0	1	0	1	1	1	2	1	0	0	13.2	45.7	1	3	12	2.11	5.36	1.35	2.78	9.08664	3.6	1	1	0	0	1	1	3
1501141342	1	33	1	0	0	1	0	3	1	0	0	0	1	0	0	2	1	1	1	14.97	47.8	0	3	3	1.44	3.9	1.09624	2.64482	13.7	2.72	0	0	0	0	0	1	1
1501141343	4	37	1	1	1	1	0	4	5	1	1	0	2	0	0	2	1	1	1	12.44	62.4	1	9	36	0.65	2.54	1.42	0.96	8.8	5.15	0	0	0	0	0	1	1
1501141344	4	74	0	0	0	1	1	1	3	0	0	0	2	0	1	2	8	1	1	16.13	48.8	1	2	8	5.3	3.94	0.73	1.43	11.2	4.6	1	0	1	0	1	1	3
1501141351	1	32	1	1	1	1	0	4	4	0	1	0	3	1	1	3	0	1	0	18.22	57.6	0	10	10	3.3	6.58	1.13	3.51	9.08664	4.87	1	1	0	1	1	1	1
1501141352	1	55	0	0	1	1	0	3	5	0	0	0	1	0	1	2	5	1	0	11.4	67.6153	1	5	5	2.21502	4.75798	1.09624	2.64482	9.4	5.77802	1	0	0	0	1	1	2
1501141353	2	54	0	0	1	1	0	4	5	0	0	1	1	0	0	1	6	1	0	7.27	35.5	0	10	20	1.67	5.87	1.12	3.53	11	5.27	0	1	0	1	1	1	2
1501161351	3	68	0	1	1	1	0	4	5	0	0	1	1	0	1	1	2	1	0	6.21	48.7	1	5	15	1.01	3.27	1.43	1.29	8.3	6.11	0	0	0	0	0	1	3
1501161352	4	54	1	1	1	1	0	4	5	0	1	0	1	0	0	1	12	1	0	8.65	73.7	1	7	28	1.28	5.65	0.8	4.2	9.08664	3.99	0	1	1	1	1	1	2
1501161353	3	47	1	0	1	0	1	2	4	0	0	0	2	0	0	2	11	1	0	11.39	68.1	1	5	15	1.68	4.83	0.64	3.25	10.9	4.32	0	0	1	0	1	1	2
1506121371	4	63	1	0	1	1	0	4	3	1	1	0	2	0	1	1	2	0	0	6.13	77	1	5	20	0.89	4.57	1.14	3.36	9.08664	5.24	0	0	0	0	0	1	3
1506121372	4	57	0	0	1	1	0	4	4	0	0	0	1	0	0	1	12	1	1	4.2	67.6153	1	7	28	2.21502	4.75798	1.09624	2.64482	9.5	5.77802	1	0	0	0	1	1	2
1506121373	4	50	0	1	1	1	0	4	4	0	0	0	1	1	0	1	0	1	0	8.27	44.6	1	8	32	6.38	7.26	0.97	3.37	9	5.43	1	1	1	1	1	1	2
1506121374	3	57	0	0	1	1	1	3	2	0	0	1	1	1	1	2	0	0	0	11.15	50.2	0	6	18	3.39	5.02	1.02	2.72	9.08664	3.57	1	0	1	0	1	1	2
1506121375	4	56	0	1	1	1	1	1	1	0	0	0	2	0	0	1	13	1	0	7.76	38.6	1	5	20	3.27	5.25	0.89	3.2	12.6	3.67	1	1	1	0	1	1	2
1506150376	4	79	1	0	1	1	0	3	2	0	0	1	1	0	1	1	10	1	0	7.2	67.6153	1	6	24	2.21502	4.75798	1.09624	2.64482	10.1	5.77802	1	0	0	0	1	1	3
1506151371	4	52	1	1	1	1	1	3	1	1	0	0	1	0	0	2	7	0	0	13.67	60.3	1	5	20	1.29	3.83	0.74	2.71	10.1	5.45	0	0	1	0	1	1	2
1506151372	1	39	1	1	1	1	0	4	4	0	1	0	3	0	0	3	2	1	0	17.05	67.8	0	10	10	1.3	3.71	1.03	2.41	10	4.03	0	0	1	0	1	1	1
1506151373	1	78	1	0	1	1	1	2	2	1	0	0	1	0	1	2	5	1	1	14.35	52.6	0	10	10	1.03	2.8	0.85	1.63	9.2	5.26	0	0	1	0	1	1	3
1506151374	1	35	1	0	1	1	0	4	4	0	0	0	1	1	0	2	0	1	0	11.38	65.6	0	8	8	3.27	4.08	0.8	2.35	7.6	5.1	1	0	1	0	1	1	1
1506151375	3	50	1	1	1	1	0	4	4	1	1	1	2	0	1	1	2	1	0	7.04	59.8	1	8	24	6.61	4.11	0.5	1.48	6.6	5.31	1	0	1	0	1	0	2
1506171371	4	76	0	1	1	1	0	3	2	0	0	1	1	0	1	1	26	1	1	4.31	72.8	1	7	28	0.72	4.35	1.39	2.68	6.8	9.9	0	0	0	0	0	0	3
1506171372	3	49	1	1	1	0	0	3	3	0	1	0	3	1	0	1	0	1	0	5.59	75	1	6	18	0.98	3.41	1.1	2.07	4.9	6.93	0	0	0	0	0	0	2
1506191371	4	43	1	1	1	1	0	3	3	1	1	0	2	0	1	1	10	1	1	6.19	67.5	1	6	24	2.15	2.66	0.8	1.46	6.3	5.67	1	0	1	0	1	0	1
1506191372	4	33	1	1	1	1	0	3	3	1	1	0	3	1	0	1	1	1	0	6.11	62.9	1	8	32	2.24	5.32	1.01	3.39	7.9	5.4	1	1	1	1	1	1	1
1506191373	4	56	1	1	1	1	0	4	3	1	0	1	2	0	0	1	3	1	0	7.99	63.7	1	6	24	0.96	3.76	1.19	2.22	9.08664	4.32	0	0	0	0	0	1	2
1506191374	3	51	1	1	1	0	0	2	3	0	0	0	2	1	1	1	0	0	0	9.84	76	1	6	18	2.24	5.42	0.95	3.32	12	4.73	1	1	1	0	1	1	2
1506191375	1	53	1	1	1	1	0	3	3	0	0	1	2	0	1	1	5	1	0	6.13	70.1	0	8	8	2.02	4.25	1.23	2.37	7.6	8.39	1	0	0	0	1	1	2
1506221351	3	55	0	1	1	1	0	4	5	0	0	0	1	1	0	1	0	1	0	6.13	59.3	1	8	24	1.31	4.6	1.4	2.56	9.08664	4.98	0	0	0	0	0	1	2
1506221352	3	57	1	1	1	1	0	4	5	1	1	0	2	0	0	1	11	1	0	8.51	69.5	1	5	15	1.59	4.11	1.1	2.56	7.8	6.17	0	0	0	0	0	1	2
1506221353	3	29	1	0	1	0	1	2	1	0	0	0	1	1	1	1	0	1	0	5.89	68.9	1	10	30	3.3	3.52	0.77	1.88	9.08664	7.16	1	0	1	0	1	1	1
1506221354	3	42	1	1	1	1	0	4	4	1	1	0	2	0	0	1	4	1	1	7.41	46.9	1	5	15	0.98	4.32	0.95	2.71	9.08664	5.56	0	0	1	0	1	1	1
1506241371	#NULL!	78	1	1	1	1	0	3	2	0	0	1	2	0	1	1	15	1	0	4.64	59.6	1	5	#NULL!	0.64	3.15	1.33	1.36	6.2	7.95	0	0	0	0	0	0	3
1506241372	4	56	1	1	1	1	0	3	2	0	0	1	3	1	1	2	0	1	0	14.74	98.9	1	6	24	3.65	3.27	0.6	1.42	9.08664	7.47	1	0	1	0	1	1	2
1506241373	4	45	0	1	1	1	0	3	3	0	0	0	2	1	1	1	0	1	0	9.61	37.7	1	5	20	2.29	6.48	0.73	4.48	9.08664	6.21	1	1	1	1	1	1	2
1506241374	1	54	1	0	1	0	1	1	1	0	0	1	1	0	0	1	15	1	1	8.74	74	0	10	10	0.96	4.29	0.94	2.62	15.7	8.36	0	0	1	0	1	1	2
1506241375	1	69	0	1	1	0	1	2	1	0	0	1	2	0	1	1	7	1	1	9.03	86.2	1	8	8	2.09	2.7	0.96	1.09	10.3	5.53	1	0	1	0	1	1	3
1506291351	4	65	0	1	1	1	1	3	5	0	0	0	3	0	1	1	10	1	0	7.34	32.9	1	3	12	1	4.61	1.74	2.41	8.2	4.56	0	0	1	0	1	1	3
1506291352	4	67	1	1	1	1	0	3	5	0	1	0	1	0	1	2	37	1	1	12.89	112.5	1	9	36	1.94	4.04	0.89	2.25	10.6	7.54	1	0	1	0	1	1	3
1506291353	3	66	0	1	1	1	0	3	4	0	0	1	2	0	1	1	12	1	0	8.23	42.1	1	3	9	0.85	2.43	1.22	1.03	8.7	4.85	0	0	0	0	0	1	3
1506291354	4	61	0	1	1	1	0	3	4	0	0	0	2	0	1	1	0	1	0	5.96	65.9	1	4	16	1.47	4.44	1.51	2.49	6.5	5.93	0	0	0	0	0	0	3
1507011371	4	62	1	0	1	1	0	3	2	1	1	1	1	0	0	1	8	1	0	5.09	57.7	1	6	24	0.75	4.77	1.57	2.49	11.8	6.26	0	0	1	0	1	1	3
1507011372	4	29	0	1	0	1	0	4	2	0	0	0	3	1	1	1	0	0	0	5.72	104.4	1	5	20	1.95	4.19	0.77	2.64	9.08664	4.02	1	0	1	0	1	1	1
1507011373	4	65	0	0	1	0	1	2	1	0	0	1	1	0	1	1	10	1	1	3.05	64.3	1	6	24	2.46	4.26	1.09	2.24	10.2	9.9	1	0	0	0	1	1	3
1507011374	4	56	0	0	1	0	1	1	1	0	0	0	3	0	1	2	19	1	0	12.52	35.6	1	4	16	2.11	5.17	0.93	3.2	11.1	6.31	1	0	1	0	1	1	2
1507031352	1	59	0	0	0	0	1	1	1	0	0	1	2	0	0	1	6	1	0	7.82	34.8	1	8	8	1.87	5.16	1.39	2.95	13.8	4.48	1	0	0	0	1	1	2
1507031353	4	60	1	1	1	1	1	3	4	1	1	1	2	0	0	1	3	1	0	7.31	52.1	1	7	28	1.36	4.84	1.1	2.84	9.08664	5.24	0	0	0	0	0	1	3
1507061351	4	65	0	1	1	1	1	1	4	0	0	1	2	0	1	2	3	1	0	14.2	67.6153	1	8	32	2.21502	4.75798	1.09624	2.64482	9.8	5.77802	1	0	0	0	1	1	3
1507061371	1	57	1	0	1	1	0	3	2	1	0	1	1	0	0	2	28	1	1	16.4	67.6153	0	8	8	2.21502	4.75798	1.09624	2.64482	9.2	5.77802	1	0	0	0	1	1	2
1507061372	4	51	1	0	1	1	0	2	1	1	0	1	1	0	0	1	11	1	1	1.4	364	1	8	32	1.53	4.48	1.09624	2.64482	5.8	9.9	0	0	0	0	0	0	2
1507061373	4	63	0	1	1	1	0	4	2	0	0	1	1	0	1	1	6	1	0	5.58	47	1	6	24	1.4	4.38	1.01	2.83	7.3	5.17	0	0	1	0	1	1	3
1507071371	1	51	0	0	1	0	0	3	1	0	0	1	3	1	1	1	0	0	0	6.06	36.1	0	8	8	0.88	7.81	3.25	3.38	9.08664	2.64	0	1	1	1	1	1	2
1507071372	4	55	1	1	1	1	0	3	2	1	1	0	1	1	1	1	0	1	1	7.53	73.6	1	5	20	1.47	3.06	0.88	1.64	6.6	4.62	0	0	1	0	1	0	2
1507071373	4	47	1	1	1	1	1	3	1	1	1	1	2	0	1	1	5	1	0	10.49	61.2	1	6	24	5.87	3.59	0.65	1.31	8.4	6.07	1	0	1	0	1	1	2
1507071374	4	58	0	0	1	0	1	1	1	0	0	1	2	0	1	2	3	1	1	12.48	71.1	1	8	32	3.24	6.82	1.09624	2.64482	10.8	9.89	1	1	0	0	1	1	2
1507071375	2	50	0	1	1	1	0	3	2	0	0	1	2	1	1	1	0	0	0	6.8	67.6153	0	6	12	2.21502	4.75798	1.09624	2.64482	9.08664	5.77802	1	0	0	0	1	1	2
1507091351	4	61	1	0	1	1	0	3	5	0	0	1	2	0	1	1	24	1	0	4.6	66.8	1	6	24	0.72	2.83	1.04	1.2	8.5	7.74	0	0	0	0	0	1	3
1507091352	1	31	1	1	1	1	0	3	4	1	1	0	2	1	1	2	0	1	0	15.45	45.9	0	5	5	5.89	3.74	0.62	1.21	9.08664	6.06	1	0	1	0	1	1	1
1507091353	1	54	1	0	1	1	0	4	4	0	1	0	1	0	1	1	10	1	0	5.09	82.2	1	9	9	0.93	4.67	1.01	3.26	6	6.48	0	0	1	0	1	0	2
1507091354	4	57	0	0	1	0	1	2	3	0	0	0	2	0	1	1	20	1	1	11	53.1	1	8	32	1.08	3.11	0.68	1.8	12.2	6.08	0	0	1	0	1	1	2
1507091358	4	67	0	0	1	0	1	1	3	0	0	0	1	0	0	1	9	1	0	8.2	65.2	1	4	16	5.84	4.55	0.49	1.85	8.7	2.99	1	0	1	0	1	1	3
1507091359	2	47	0	1	1	1	0	3	4	0	0	0	2	0	1	1	10	1	0	8.81	46.1	1	1	2	1.39	3.67	0.91	2.19	9.6	5.69	0	0	1	0	1	1	2
1507141371	4	51	1	0	1	1	0	3	3	1	1	0	3	0	1	1	11	1	1	10.2	56.3	1	4	16	2.53	4.03	0.63	2.4	9.8	4.01	1	0	1	0	1	1	2
1507141372	4	52	0	0	1	1	0	3	1	0	0	1	2	0	0	1	18	1	1	7.5	62.3	1	7	28	2.53	4.77	0.91	2.81	8.1	5.23	1	0	1	0	1	1	2
1507141373	4	72	0	1	1	1	0	3	1	0	0	1	2	0	1	2	18	1	1	12.01	44.6	1	6	24	2.52	4.41	1.72	2.14	9	6.95	1	0	1	0	1	1	3
1507141374	4	72	0	1	0	1	0	3	2	0	0	1	1	0	0	1	17	1	1	5.71	50.8	1	8	32	0.5	4.41	2.7	1.39	5.7	4.16	0	0	1	0	1	0	3
1507141375	4	55	1	1	1	0	1	3	1	0	0	1	3	0	1	1	15	1	1	6.79	373	1	8	32	1.04	5.08	1.46	2.99	4.2	9.9	0	0	0	0	0	0	2
1507151351	4	50	1	1	1	0	1	2	3	1	0	1	1	0	0	1	6	1	1	4.78	52.5	1	2	8	0.75	3.83	1.43	2.11	8.7	6.16	0	0	0	0	0	1	2
1507151352	4	52	0	0	1	1	1	2	3	0	0	1	2	0	0	2	6	1	1	14	67.6153	1	3	12	2.21502	4.75798	1.09624	2.64482	9.08664	5.77802	1	0	0	0	1	1	2
1507151353	4	55	0	1	1	1	0	3	3	0	0	0	2	0	1	1	21	1	1	7.23	89.4	1	6	24	4.17	5.68	0.8	2.95	9.1	7.54	1	1	1	0	1	1	2
1507171371	1	47	1	1	1	1	0	3	3	1	1	0	1	0	1	1	4	1	1	5.57	73.4	0	8	8	1.39	3.69	0.77	2.28	6.4	4.94	0	0	1	0	1	0	2
1507171372	4	21	1	0	1	1	0	3	3	0	0	0	3	0	0	2	2	1	0	12.62	56.3	1	6	24	4.04	5.07	0.81	2.58	13.6	4.09	1	0	1	0	1	1	1
1507171373	4	55	1	1	1	1	0	3	2	0	1	0	1	0	0	1	7	1	0	7.65	62.4	1	5	20	2.84	3.65	0.78	1.98	9.4	5.24	1	0	1	0	1	1	2
1507171374	4	55	0	1	1	0	1	2	1	0	0	1	1	0	0	1	10	1	1	10.56	47.6	1	7	28	0.8	5.9	1.21	3.98	12.6	5.43	0	1	0	1	1	1	2
1507171375	1	36	1	0	1	1	0	4	2	0	1	0	1	0	0	2	12	1	0	15.91	54.8	0	8	8	2.11	4.45	1.09624	2.64482	12.6	6.16	1	0	0	0	1	1	1
1507211371	4	62	0	1	1	1	0	3	2	0	0	1	1	0	1	1	11	1	1	8.24	54.6	1	6	24	2.06	3.7	1.11	2.17	9.1	8.19	1	0	0	0	1	1	3
1507211372	4	68	0	1	1	1	0	1	1	0	0	1	2	0	1	1	15	1	1	10.44	48.2	1	7	28	1.68	4.49	1.33	2.52	8.7	6.15	0	0	0	0	0	1	3
1507211373	4	65	1	1	1	1	0	4	2	0	0	1	1	0	1	1	25	1	0	4.64	64.6	1	6	24	0.52	2.28	1.07	0.91	6.2	4.65	0	0	0	0	0	0	3
1507211374	4	46	1	0	1	0	1	3	1	0	0	1	1	1	0	2	0	1	0	13.25	45.9	1	5	20	0.89	2.62	1	1.29	14.6	4.84	0	0	1	0	1	1	2
1507241351	4	51	1	1	1	0	0	2	4	1	1	1	2	0	0	1	13	1	1	8.5	75.6	1	3	12	2.33	3.48	1.09624	2.64482	9.4	5.03	1	0	0	0	1	1	2
1507241352	4	40	1	1	1	0	1	3	1	0	0	0	1	0	0	2	5	0	1	12.09	56.7	1	4	16	0.76	2.62	0.73	1.62	8.2	6.51	0	0	1	0	1	1	1
1507241353	3	36	0	0	1	1	0	3	4	0	1	0	1	1	0	1	0	0	0	4.46	48.1	1	6	18	1.16	4.02	1.09624	2.64482	5.3	3.43	0	0	0	0	0	0	1
1507241354	4	56	1	1	1	1	0	3	5	1	0	0	2	0	1	1	5	1	0	4.79	82.9	1	6	24	0.99	4.28	1.31	2.58	5.9	9.64	0	0	0	0	0	0	2
1507281371	4	58	1	1	1	1	1	3	1	1	0	1	2	0	1	2	14	1	1	16.46	71.1	1	6	24	1.1	3.27	1.38	1.35	9.7	5.36	0	0	0	0	0	1	2
1507281372	4	81	1	1	1	1	0	4	1	0	0	1	2	0	1	1	13	1	1	10.6736	67.6153	1	7	28	2.21502	4.75798	1.09624	2.64482	9.08664	5.77802	1	0	0	0	1	1	3
1507281373	4	69	1	1	1	1	0	4	2	0	0	1	2	0	1	1	16	1	1	9.4	72.1	1	7	28	0.8	2.56	0.85	1.32	9.2	9.66	0	0	1	0	1	1	3
1507281374	1	68	0	1	1	1	0	3	1	0	0	1	2	0	1	1	16	1	1	9.57	54.4	0	8	8	1.44	3.03	1.1	1.37	11.8	3.56	0	0	0	0	0	1	3
1507301351	1	63	0	1	1	1	0	3	4	0	0	0	1	0	1	1	10	1	0	8.7	67.6153	1	3	3	2.21502	4.75798	1.09624	2.64482	9.08664	5.77802	1	0	0	0	1	1	3
1508041371	1	58	1	1	1	1	0	4	3	0	1	1	2	0	1	1	3	1	0	6.34	93.5	0	8	8	2.65	4.07	0.91	2.09	6.1	5.34	1	0	1	0	1	0	2
1508041372	4	43	1	1	1	1	0	3	2	1	1	0	3	0	1	3	18	1	1	19.92	112.6	1	7	28	10.83	4.73	0.39	0.57	9.9	7.8	1	0	1	0	1	1	1
1508041373	4	57	1	1	1	1	0	4	3	0	0	0	1	0	1	1	15	1	1	5.91	55.2	1	6	24	0.99	2.89	0.73	1.52	8.2	7.79	0	0	1	0	1	1	2
1508041374	4	50	1	0	1	1	1	2	1	0	0	1	2	0	0	3	7	1	1	18.9	46.8	1	5	20	0.72	4.39	1.45	2.52	11.6	5.75	0	0	0	0	0	1	2
1508041375	1	66	1	1	1	1	0	3	1	0	1	1	3	0	1	1	12	1	1	7.93	58.8	0	6	6	2.39	3.84	1.06	1.92	7.3	4.52	1	0	0	0	1	1	3
1508041376	4	48	1	1	1	1	1	3	3	1	1	1	1	0	0	1	7	1	1	7.97	47.6	1	6	24	0.6	3.71	1.39	1.65	7.6	3.16	0	0	0	0	0	1	2
1508041377	4	50	0	1	1	1	1	2	1	0	0	1	2	0	0	1	8	1	0	8.85	36.5	1	5	20	2.23	3.86	1.16	2.04	9.6	3.58	1	0	0	0	1	1	2
1508081351	4	66	1	1	1	1	0	4	5	1	0	1	2	0	1	1	12	1	1	8.13	63.3	1	4	16	2.75	3.7	0.65	1.83	7.6	5.61	1	0	1	0	1	1	3
1508081352	1	22	0	1	0	0	0	3	3	0	0	1	1	1	0	1	0	1	1	7.29	67.6153	1	3	3	2.21502	4.75798	1.09624	2.64482	9.08664	5.77802	1	0	0	0	1	1	1
1508081353	4	56	1	1	1	1	0	3	1	1	1	1	2	0	1	1	14	1	0	6.9	67.6153	1	3	12	2.21502	4.75798	1.09624	2.64482	8.3	5.77802	1	0	0	0	1	1	2
1508081354	4	39	0	1	1	0	1	3	1	0	0	1	3	1	0	1	0	0	0	6.3	99.4	1	8	32	1.5	3.5	1.04	1.97	6.1	7.89	0	0	0	0	0	0	1
1508111371	4	73	0	1	1	1	0	2	1	0	0	1	2	0	1	1	7	1	1	4.7	53.8	1	5	20	1.18	3.47	1.87	1.13	6.3	5.09	0	0	1	0	1	0	3
1508111372	2	49	1	1	1	1	0	4	2	1	1	1	2	0	1	1	15	1	1	4.37	65.2	0	6	12	0.77	3.73	1.04	2.34	9.08664	7.6	0	0	0	0	0	1	2
1508111373	1	56	1	0	1	1	1	3	1	1	1	1	1	1	0	1	0	0	0	10.87	54.9	0	8	8	8.05	4.73	0.76	1.01	8.8	5.17	1	0	1	0	1	1	2
1508111374	1	57	0	1	1	1	0	2	2	0	0	1	3	0	1	1	7	1	0	7.28	45.9	0	8	8	2.07	4.65	0.9	2.89	9.08664	4.87	1	0	1	0	1	1	2
1508111375	4	63	0	1	1	1	0	3	1	0	0	1	1	0	0	1	25	1	1	8.23	42.6	1	5	20	0.89	3.27	1.11	1.79	9.1	6.6	0	0	0	0	0	1	3
1508111376	4	69	0	1	1	0	1	1	1	1	0	1	1	1	0	2	13	1	1	13.29	68	1	5	20	1.26	4.28	1.07	2.65	9.08664	4.83	0	0	0	0	0	1	3
1508131351	4	64	1	0	1	0	0	2	1	1	0	1	1	0	0	1	8	1	1	6.39	66.4	1	4	16	2.27	5.31	1.21	3.06	6.7	6.6	1	1	0	0	1	0	3
1508131352	2	55	0	1	1	1	0	3	5	0	0	0	1	0	1	1	10	1	0	8.47	41.4	0	8	16	1.2	5.27	1.28	3.4	7.2	4.62	0	1	0	1	1	1	2
1508131353	4	60	0	1	1	0	1	2	2	0	0	0	1	0	0	1	3	1	0	4.38	41.1	1	3	12	0.77	3.98	0.93	2.59	10.9	3.4	0	0	1	0	1	1	3
1508131354	4	67	1	1	1	1	0	3	4	1	0	0	2	0	1	1	30	1	1	4.29	63.6	1	4	16	0.98	3.47	1.12	1.61	7.8	4.94	0	0	0	0	0	1	3
1508191371	3	57	1	1	1	1	0	4	2	0	0	1	1	0	0	1	2	1	0	4.09	58.9	1	6	18	0.58	3	1.27	1.34	5.5	6.1	0	0	0	0	0	0	2
1508191372	1	82	0	1	1	1	0	3	1	0	0	0	2	0	1	1	28	1	1	6.68	57.5	0	8	8	1.69	4.24	1.09624	2.64482	7.3	7.39	0	0	0	0	0	1	3
1508191373	4	69	1	1	1	1	0	4	1	0	1	1	2	0	1	1	17	1	0	6.87	64.2	1	6	24	1.53	3.34	0.99	1.73	10.3	3.81	0	0	1	0	1	1	3
1508191374	3	67	0	1	1	1	0	1	1	0	0	1	3	0	1	3	20	1	1	16.99	65.8	0	7	21	3.29	3.62	0.92	1.79	11.5	6.41	1	0	1	0	1	1	3
1508191375	1	37	1	0	1	0	1	2	1	0	0	1	1	1	0	1	0	0	0	10.6736	67.6153	0	7	7	2.21502	4.75798	1.09624	2.64482	9.08664	5.77802	1	0	0	0	1	1	1
1508201371	1	30	1	0	1	0	0	3	3	1	1	0	2	1	0	1	0	0	0	10.01	63.2	0	9	9	3.83	4.96	0.8	2.57	11.8	7.08	1	0	1	0	1	1	1
1508201372	4	79	1	0	1	0	1	2	1	0	0	1	3	0	1	1	13	1	1	3.6	66.7	1	6	24	1.37	3.82	0.71	2.34	7.6	5.37	0	0	1	0	1	1	3
1508201373	4	46	1	1	1	1	0	4	3	1	1	0	1	0	0	2	5	1	0	13.14	65.4	1	6	24	1.88	5.28	1.13	3.23	11.4	6.75	1	1	0	0	1	1	2
1508201374	1	45	1	1	1	1	0	2	3	1	0	0	2	1	0	1	0	1	0	8.76	62.6	0	8	8	3.4	5.35	0.98	2.95	11.3	7.22	1	1	1	0	1	1	2
1508201375	1	44	1	1	1	1	1	3	3	1	1	0	2	1	0	2	3	1	1	15.04	39.5	1	6	6	1.44	2.88	1.06	1.38	9.6	1.96	0	0	0	0	0	1	1
1508201376	4	51	1	0	1	1	0	3	3	0	0	0	3	0	1	1	13	1	0	8.13	76.3	1	6	24	1.83	4.55	0.87	2.92	8.6	4.61	1	0	1	0	1	1	2
1508201377	4	71	0	1	1	1	0	3	1	0	0	1	2	0	0	1	7	1	1	5.53	66.2	1	8	32	0.89	4.94	1.09624	2.64482	13.2	6.37	0	0	0	0	0	1	3
1508201378	4	74	1	0	1	1	0	3	1	1	1	1	2	0	0	1	16	1	1	5.91	61.1	1	6	24	1.53	5	1.41	3.04	10.2	4.08	0	0	0	0	0	1	3
1508201379	1	30	1	1	1	1	0	4	2	0	0	0	2	1	0	2	0	1	0	11.69	67.1	0	7	7	2.25	3.86	1.09624	2.64482	9.08664	9.09	1	0	0	0	1	1	1
1508211371	4	73	0	0	0	0	1	1	1	0	0	1	2	0	1	1	21	1	1	6.44	71.5	1	6	24	1.35	4.35	1.01	2.56	7.4	6.71	0	0	1	0	1	1	3
1508211372	4	53	1	0	1	1	0	3	3	0	0	0	2	0	0	2	7	1	1	11.16	65.6	1	5	20	1.42	4.66	0.78	3.23	9.8	4.42	0	0	1	0	1	1	2
1508211373	4	58	1	1	1	1	0	4	3	1	1	0	2	0	1	1	10	1	0	7.08	51.2	1	6	24	0.93	3.46	0.69	1.92	7.1	3.62	0	0	1	0	1	1	2
1508251371	1	54	1	1	1	0	1	3	1	1	0	1	1	0	1	2	12	1	0	12.34	67.6	1	7	7	8.26	9.46	0.73	3.23	11.2	5.8	1	1	1	0	1	1	2
1508251372	1	67	0	0	1	1	1	3	1	0	0	1	2	0	1	2	10	1	0	12.32	35.4	0	10	10	1.65	2.6	0.56	1.31	10.5	2.47	0	0	1	0	1	1	3
1508251373	1	77	1	1	1	0	1	3	1	0	1	1	1	0	1	1	14	1	1	10.6736	67.6153	0	10	10	2.21502	4.75798	1.09624	2.64482	10.5	5.77802	1	0	0	0	1	1	3
1508251374	1	31	0	1	1	1	0	4	3	0	0	0	1	0	0	1	5	1	0	8.26	46.2	0	5	5	4.04	5.8	1.17	3.09	9.08664	5.92	1	1	0	0	1	1	1
1508251375	1	80	0	0	1	1	0	4	2	0	0	1	2	0	0	2	27	1	0	12.73	60	0	8	8	1.49	3.13	1.24	1.52	12	6.57	0	0	0	0	0	1	3
1508261351	1	67	1	1	1	0	0	3	4	1	0	0	1	0	0	1	7	1	1	5.8	41.1	0	8	8	4.48	6.7	1.24	3.35	11.7	6.21	1	1	0	0	1	1	3
1508261352	4	37	0	0	1	0	1	2	3	0	0	1	1	0	0	1	2	1	0	10.6736	67.6153	1	4	16	2.21502	4.75798	1.09624	2.64482	9.08664	5.77802	1	0	0	0	1	1	1
1508261353	4	57	1	0	1	0	1	1	2	0	0	1	1	0	1	1	15	1	1	6.75	53.6	1	2	8	0.43	3.46	1.09624	2.64482	13.2	9.92	0	0	0	0	0	1	2
1508261354	3	56	1	1	1	1	0	3	3	1	1	0	2	0	0	1	11	1	1	9.2	67.6153	1	3	9	2.21502	4.75798	1.09624	2.64482	7.8	5.77802	1	0	0	0	1	1	2
1508261355	3	65	0	1	1	1	1	3	4	0	0	0	1	0	1	1	19	1	1	6.82	60.8	1	6	18	2.5	4.55	1.06	2.48	7.1	5.33	1	0	0	0	1	1	3
1508281371	4	58	1	1	1	1	0	3	2	0	1	1	2	0	0	1	15	0	1	7.46	71.7	1	5	20	1.64	4.27	1.17	2.52	8.5	2.95	0	0	0	0	0	1	2
1508281372	4	57	0	1	1	1	0	3	2	0	0	1	2	0	1	1	6	1	0	6.52	41.7	1	6	24	1.85	4.97	1.09624	2.64482	10.1	4.96	1	0	0	0	1	1	2
1508281373	4	69	1	1	1	1	0	4	2	0	0	1	1	0	1	1	15	1	0	7.12	42.4	1	6	24	1.99	5.17	1.03	3.38	7.2	6.06	1	0	1	1	1	1	3
1508281374	4	67	1	0	1	1	0	2	1	0	0	1	2	0	1	1	9	1	0	9.61	53.6	1	6	24	1.11	4.94	1.08	3.26	10	6.47	0	0	0	0	0	1	3
1508281375	1	34	1	1	1	1	0	1	3	1	0	1	3	0	0	1	3	1	0	8.68	67.6153	0	8	8	2.21502	4.75798	1.09624	2.64482	9.08664	5.77802	1	0	0	0	1	1	1
1508281376	1	32	1	1	1	1	0	4	3	1	1	0	3	1	0	1	0	1	0	7.89	68.4	0	8	8	2.3	4.39	0.97	2.37	8.6	4.45	1	0	1	0	1	1	1
1508281377	4	51	0	0	1	0	1	1	2	0	0	1	2	0	1	2	15	1	0	12.44	43.1	1	5	20	3.75	4.69	0.76	2.59	9.7	6.31	1	0	1	0	1	1	2
1508281378	4	54	0	0	1	1	0	2	1	0	0	1	3	0	0	2	7	1	0	11.19	33.4	1	5	20	3.61	4.31	1.24	2.01	10.3	5.91	1	0	0	0	1	1	2
1508281379	4	58	0	1	1	1	0	3	1	0	0	1	2	0	0	1	6	1	1	5.55	50.1	1	5	20	1.03	3.93	0.79	2.68	6.6	3.02	0	0	1	0	1	0	2
1509011371	4	64	1	1	1	1	0	4	1	0	0	1	1	0	0	1	16	1	0	7.63	47.6	1	5	20	5.7	5.32	0.91	2.43	7.7	3.98	1	1	1	0	1	1	3
1509011372	4	77	1	1	1	1	0	3	1	0	0	1	1	0	1	1	9	1	0	4.69	56.1	1	5	20	0.93	3.82	1.1	2.14	12.3	7.26	0	0	0	0	0	1	3
1509011373	4	46	0	1	1	1	0	3	2	0	0	1	2	1	0	1	0	0	0	5.3	46.2	1	6	24	0.96	3.42	1.09624	2.64482	10.8	4.59	0	0	0	0	0	1	2
1509011374	1	51	0	0	1	0	1	1	1	0	0	1	2	0	1	2	15	1	1	11.66	64.2	0	8	8	7.27	8.92	1.09624	2.64482	9.7	4.98	1	1	0	0	1	1	2
1509011375	1	58	0	1	1	1	0	4	2	0	0	1	2	1	0	1	0	0	0	6.77	44.5	0	8	8	1.84	4.91	1.09624	2.64482	6.4	4.22	1	0	0	0	1	0	2
1509011376	1	26	1	1	1	1	0	4	2	1	1	1	1	1	0	2	0	0	1	11.36	81.1	0	6	6	1.61	4.44	1.09624	2.64482	10.4	3.94	0	0	0	0	0	1	1
1509011377	4	71	1	1	1	1	0	3	1	0	1	1	1	0	0	1	2	1	1	7.94	66.9	1	6	24	1.14	3.95	1.56	1.96	7.7	5.28	0	0	1	0	1	1	3
1509011378	4	74	1	0	1	0	0	3	1	0	0	1	2	0	1	1	17	1	1	9.88	46.3	1	5	20	0.44	3.19	1.31	1.54	8.6	6.58	0	0	0	0	0	1	3
1509041371	4	28	1	1	1	1	0	4	2	0	0	1	1	0	1	1	5	0	0	4.4	66	1	6	24	1.19	5.24	1.09624	2.64482	9.5	5.37	0	1	0	0	1	1	1
1509041372	1	51	1	1	1	1	0	3	2	0	0	1	1	0	0	1	0	1	0	8.91	56.2	0	6	6	2.65	3.13	1.09624	2.64482	13.3	4.01	1	0	0	0	1	1	2
1509041373	4	54	1	1	1	1	0	3	2	0	1	0	2	1	0	1	0	0	0	8.61	47.9	1	6	24	0.69	3.6	1.07	2.24	13.1	4.79	0	0	0	0	0	1	2
1509041375	1	81	0	1	1	1	0	3	1	0	0	1	1	0	1	2	35	1	1	14.5	41.6	0	8	8	0.9	4.21	1.78	1.99	11.4	5.14	0	0	1	0	1	1	3
1509041376	1	73	0	1	1	1	0	3	1	0	0	1	2	0	1	1	35	1	1	3.63	53.4	0	7	7	0.54	2.92	1.38	1.24	6.9	6.91	0	0	0	0	0	0	3
1509041377	1	45	0	1	1	1	0	4	1	0	0	1	2	0	1	1	13	1	1	9.26	95.7	0	8	8	3.57	5.18	1.4	2.8	8.7	9.66	1	1	0	0	1	1	2
1509041378	1	71	0	1	1	1	0	3	1	0	0	1	1	0	1	1	9	1	1	6.44	70.5	0	7	7	1.67	4.61	1.09624	2.64482	7.1	4.64	0	0	0	0	0	1	3
1509051374	4	55	1	1	1	1	0	4	2	1	1	1	1	0	0	1	9	1	0	5.84	95.3	1	5	20	1.87	4.73	1.02	3.19	6.4	8.42	1	0	1	0	1	0	2
1509081371	4	64	1	1	1	1	0	3	1	0	0	1	1	0	0	1	0	1	0	6.51	54.6	1	6	24	0.89	3.39	1.47	1.51	7.3	7.02	0	0	0	0	0	1	3
1509081372	1	47	1	1	1	1	0	4	2	1	1	0	2	0	0	2	5	1	0	14.71	59.6	0	6	6	3.89	5.55	0.94	3.24	10.9	5.61	1	1	1	0	1	1	2
1509081373	4	63	1	1	1	1	0	3	1	0	0	0	2	0	0	2	28	1	1	13.64	107.9	1	5	20	1.22	3.36	1.03	1.98	9.08664	7.93	0	0	1	0	1	1	3
1509081374	4	57	0	0	1	1	0	3	1	0	0	1	3	0	1	1	7	1	0	7.16	76.2	1	6	24	1.28	3.44	1.09624	2.64482	10.8	8.56	0	0	0	0	0	1	2
1509081375	3	56	0	1	0	1	0	4	1	0	0	1	1	0	0	1	21	1	0	5.2	71.9	0	7	21	1.14	4.23	0.91	2.84	9.5	6.67	0	0	1	0	1	1	2
1509081376	1	51	0	1	1	1	0	3	1	0	0	1	1	0	1	1	20	1	1	7.51	960.4	1	8	8	2.27	3.37	0.9	1.75	7.9	9.9	1	0	1	0	1	1	2
1509111351	4	36	1	1	1	1	0	4	5	1	1	0	2	0	1	2	10	1	0	13.1	46.3	1	8	32	5.8	5.46	0.89	2.36	11	4.68	1	1	1	0	1	1	1
1509111352	1	35	1	1	1	1	0	3	3	0	0	0	2	0	0	1	2	1	0	6.54	93	1	12	12	1.01	5.65	1.09624	2.64482	10.9	4.62	0	1	0	0	1	1	1
1509111353	4	61	0	0	1	1	1	3	3	0	0	1	2	0	1	1	30	1	1	8.19	69.1	1	3	12	0.65	4.42	1.24	2.76	7.9	8.64	0	0	0	0	0	1	3
1509111354	4	58	0	1	1	1	0	3	3	0	0	0	2	0	1	2	20	1	0	15.55	54	1	3	12	4.9	4.37	1.09624	2.64482	10.9	5.95	1	0	0	0	1	1	2
1509111355	2	51	0	1	1	0	1	2	3	0	0	0	2	0	0	1	7	0	0	10.6736	67.6153	1	5	10	2.21502	4.75798	1.09624	2.64482	8.6	5.77802	1	0	0	0	1	1	2
1509111356	4	84	0	1	1	1	0	3	4	0	0	0	1	0	1	2	40	1	1	12.21	52.6	1	3	12	0.73	3.03	1.09624	2.64482	9.1	5.15	0	0	0	0	0	1	3
1509151371	4	55	1	0	1	1	0	4	2	0	0	0	2	0	1	2	25	1	0	14.8	67.9	1	6	24	2.23	4.26	0.94	2.41	9.4	8.8	1	0	1	0	1	1	2
1509151372	4	54	0	1	1	1	0	2	2	0	0	1	2	0	0	2	6	1	1	13.43	67.6153	1	5	20	1.79	4.75798	1.09624	2.64482	8.1	5.77802	1	0	0	0	1	1	2
1509151373	4	56	0	1	1	1	0	4	1	0	0	1	2	0	1	1	12	1	0	9.02	54.6	1	6	24	4.77	5.71	0.88	2.81	8.2	5.93	1	1	1	0	1	1	2
1509151374	1	32	1	0	1	1	0	4	2	1	1	0	3	0	1	2	4	1	1	12.32	57	0	8	8	2.01	3.83	0.94	2.17	10.6	4.13	1	0	1	0	1	1	1
1509151375	4	76	1	1	1	1	0	3	1	0	0	1	2	0	1	1	24	1	1	7.52	103	1	6	24	1.08	4.21	1.12	2.52	10.8	6.39	0	0	0	0	0	1	3
1509151376	4	57	1	1	1	1	0	4	2	0	1	0	3	0	1	1	13	1	0	6.7	57.9	1	6	24	1.14	5.02	1.19	3.22	7	3.41	0	0	0	0	0	1	2
1509151377	1	48	1	1	1	1	0	4	2	1	1	0	2	1	0	1	0	1	1	6.65	50.2	0	7	7	3.65	3.85	1.09624	2.64482	11.7	3.87	1	0	0	0	1	1	2
1509151378	4	48	1	1	1	1	1	3	2	0	0	0	2	0	1	1	4	1	1	10.08	62.2	1	5	20	7.25	6.49	1.09624	2.64482	11	7.01	1	1	0	0	1	1	2
1509181351	4	52	0	1	1	1	1	2	2	0	0	0	1	0	0	2	16	1	1	14.12	33.5	1	3	12	2.14	5.32	1.13	3.4	12.4	4.47	1	1	0	1	1	1	2
1509181352	4	54	0	1	1	0	1	2	3	0	0	0	2	0	1	2	17	1	1	14.41	35.7	1	5	20	2.36	5.95	1.46	3.43	10.3	6.3	1	1	0	1	1	1	2
1509181353	4	60	1	1	1	1	0	3	1	0	0	0	1	0	1	1	12	1	0	7.47	79.6	1	6	24	0.74	3.38	1.1	1.92	6.4	6.92	0	0	0	0	0	0	3
1509181354	4	33	1	1	1	1	0	4	4	0	0	0	1	0	0	1	5	1	1	4.95	75.3	1	6	24	0.81	3.28	1.37	1.48	6.1	6.73	0	0	0	0	0	0	1
1509181355	4	52	1	0	1	0	1	2	2	1	0	0	2	0	1	1	14	1	1	3.35	95.6	1	5	20	1.56	5.92	1.41	3.59	6.6	7.41	0	1	0	1	1	0	2
1509181356	4	77	1	1	1	1	0	4	5	0	0	1	2	0	1	1	17	1	1	8.27	68.4	1	8	32	1.75	3.19	1.06	1.52	11.1	8.36	1	0	0	0	1	1	3
1509181357	4	55	1	1	1	1	0	4	3	1	1	1	2	0	1	1	25	1	0	9.63	58.4	1	8	32	2.08	4.86	1.36	2.75	11	6.45	1	0	0	0	1	1	2
1509231351	4	61	1	1	1	1	0	3	3	0	0	1	3	0	1	1	20	1	0	11	67.6153	1	8	32	2.21502	4.75798	1.09624	2.64482	8	5.77802	1	0	0	0	1	1	3
1509231353	4	61	0	1	1	1	0	4	3	0	0	1	1	0	1	1	13	1	0	10	42.6	1	4	16	0.37	3.41	1.09624	2.64482	10.6	4.12	0	0	0	0	0	1	3
1509231354	1	44	1	1	1	1	1	3	2	1	0	0	2	0	1	2	4	1	1	12.53	56.8	0	5	5	4.76	5.37	0.92	2.67	11.3	3.98	1	1	1	0	1	1	1
1509231355	4	49	0	1	1	1	0	3	5	0	0	1	1	0	1	1	1	1	0	8.28	54.3	1	4	16	2.07	2.39	0.87	0.97	5.5	6.36	1	0	1	0	1	0	2
1509231358	4	51	1	0	1	1	0	3	3	0	0	0	1	0	1	1	12	1	0	7.15	97.8	1	7	28	1.34	4.95	0.96	3.44	14.1	9.9	0	0	1	1	1	1	2
1509251371	4	24	1	1	0	1	0	4	2	0	0	1	1	0	0	1	2	0	0	10.11	56.8	1	6	24	0.59	3.92	1.25	2.33	10.6	4.72	0	0	0	0	0	1	1
1509251372	4	74	0	0	1	1	1	2	1	0	0	1	2	0	1	1	27	1	1	10.91	60.2	1	7	28	2.32	5.65	1.09624	2.64482	9.08664	5.08	1	1	0	0	1	1	3
1509251373	4	72	0	1	1	1	0	3	1	0	0	1	2	0	0	1	5	1	0	6.93	43.4	1	6	24	1.23	4.17	1.16	2.55	7.7	5.06	0	0	0	0	0	1	3
1509251374	1	30	1	1	1	1	0	4	2	0	1	0	2	1	0	3	0	0	0	21.3	67.6153	0	7	7	2.21502	4.75798	1.09624	2.64482	9.5	5.77802	1	0	0	0	1	1	1
1509251375	4	47	1	0	1	1	0	4	2	0	1	0	3	0	0	2	7	1	0	16.35	62.7	1	6	24	4.61	5.62	0.87	3.07	10.6	4.83	1	1	1	0	1	1	2
1509251376	4	60	1	1	1	1	0	4	1	0	1	0	1	0	0	1	24	1	0	6.12	71.5	1	5	20	1.45	4.11	1.05	2.31	6.3	5.57	0	0	0	0	0	0	3
1509251377	4	59	1	0	1	1	0	3	1	0	0	1	2	1	1	1	0	1	0	6.3	59.2	1	6	24	1.79	6.09	1.09624	2.64482	9.08664	6.3	1	1	0	0	1	1	2
1509251378	1	54	1	1	1	1	0	4	2	0	0	1	2	0	0	1	5	1	0	5.07	73.6	0	8	8	0.95	3.08	1.22	1.48	10.3	4.74	0	0	0	0	0	1	2
1509251379	4	55	1	0	1	0	1	2	1	0	0	1	1	0	1	3	2	1	1	21.57	71.9	1	5	20	0.78	6.05	1.09624	2.64482	12.4	9.7	0	1	0	0	1	1	2
1509291371	3	37	1	1	1	1	0	3	2	0	1	0	2	0	0	2	2	1	1	12.78	56.9	1	5	15	0.99	3.44	1.18	2	10.8	4.77	0	0	0	0	0	1	1
1509291372	4	74	0	0	1	1	0	1	1	0	0	1	1	0	1	2	7	1	1	14.46	165	1	6	24	1.82	4.54	0.8	3	8.6	13.93	1	0	1	0	1	1	3
1509291373	1	34	1	1	1	1	0	4	2	1	1	0	3	1	1	2	0	0	1	13.8	60.4	0	7	7	2.37	3.01	1.06	1.35	8	6.55	1	0	0	0	1	1	1
1509291374	4	71	0	1	1	1	0	1	1	0	0	1	3	0	1	3	20	1	1	17.3	77.6	1	6	24	2.28	4.28	1.05	2.42	11.9	9.9	1	0	0	0	1	1	3
1509291375	4	58	1	0	1	1	0	4	1	0	0	1	1	0	1	1	26	1	1	2.11	79.3	1	5	20	0.77	2.85	1.25	1.23	8.7	6.6	0	0	0	0	0	1	2
1509291376	1	39	1	0	1	1	0	3	2	0	0	0	3	0	1	1	3	1	1	7.84	143.4	0	8	8	2.1	6.21	0.98	3.93	6.8	9.67	1	1	1	1	1	0	1
1509291377	3	55	1	0	1	1	0	3	2	1	0	1	1	1	0	2	0	0	0	15.63	54.6	1	6	18	1.4	4.02	1.09624	2.64482	11.8	3.6	0	0	0	0	0	1	2
1510111371	1	49	1	1	1	1	0	4	2	1	1	0	2	1	1	2	0	1	1	12.26	47.2	0	7	7	2.93	5.73	1.08	3.32	10.9	6.42	1	1	0	0	1	1	2
1510111372	4	55	0	1	1	0	1	1	1	0	0	1	1	0	1	1	12	1	0	10.87	45.1	1	8	32	1.32	5.45	1.13	3.76	9.8	6.93	0	1	0	1	1	1	2
1510111373	4	52	1	1	1	0	1	3	1	0	0	1	3	0	1	1	6	1	1	7.84	104.5	1	5	20	2.77	3.43	0.9	1.69	8.6	7.89	1	0	1	0	1	1	2
1510111374	1	59	1	1	1	1	0	3	1	0	0	1	2	0	1	2	7	1	0	13.89	113.2	0	8	8	1.92	5.19	1.09624	2.64482	9.5	8.89	1	1	0	0	1	1	2
1510111375	1	47	0	1	1	1	0	4	2	0	0	0	1	0	0	1	8	1	0	7.13	46.6	0	8	8	0.95	5.89	1.62	3.6	6.5	4.64	0	1	1	1	1	0	2
1510111376	1	57	0	1	1	1	0	4	1	0	1	0	2	0	1	1	6	1	0	9.86	43.3	0	7	7	2.77	3.87	0.8	2.22	13.1	5.69	1	0	1	0	1	1	2
1510111377	4	75	1	1	1	1	0	4	1	0	0	1	1	1	1	1	0	0	0	4.22	50.5	1	8	32	0.7	2.89	1	1.51	10.9	4.21	0	0	1	0	1	1	3
1510111378	1	58	0	1	1	1	0	1	1	0	0	1	3	0	0	2	6	1	0	11.68	67.6153	0	6	6	5.54	4.75798	1.09624	2.64482	8.1	5.77802	1	0	0	0	1	1	2
1510111379	4	43	0	1	1	1	0	3	1	0	0	1	1	0	1	2	14	1	1	13.52	39.9	1	6	24	3.64	6.85	1.17	3.92	8.8	1.83	1	1	0	1	1	1	1
1510141351	4	69	1	1	1	1	0	4	4	1	1	1	2	0	1	1	5	1	0	7.64	64.2	1	7	28	1.09	4.49	1.17	2.59	9	5.4	0	0	0	0	0	1	3
1510141352	4	64	1	1	1	1	0	3	4	0	1	1	2	0	0	1	19	1	0	8.51	71.7	1	6	24	1.05	4.6	0.94	3.25	8.6	3.1	0	0	1	0	1	1	3
1510141353	4	57	1	1	1	1	0	3	3	0	1	0	1	0	0	1	10	1	0	6.35	78	1	5	20	0.61	3.08	1.14	1.62	6.5	5.42	0	0	0	0	0	0	2
1510141354	4	38	1	1	1	1	0	4	5	0	0	0	3	0	0	1	2	1	0	6.05	67.1	1	6	24	0.8	3.27	0.92	2.04	5.65	6.29	0	0	1	0	1	0	1
1510141355	4	43	1	1	1	1	0	3	1	0	0	1	2	0	0	2	10	1	1	12.04	50	1	6	24	1.9	3.5	0.71	2.09	11.1	6.92	1	0	1	0	1	1	1
1510141356	1	60	1	1	1	1	0	2	4	1	0	0	2	0	0	2	20	1	0	11.6	64.5	0	8	8	2.6	4.75798	1.09624	2.64482	9	6.31	1	0	0	0	1	1	3
1510141357	4	72	0	1	1	1	0	4	3	0	0	1	2	0	1	1	20	1	0	5.07	60.7	1	6	24	1.24	2.93	1.22	1.2	6.6	6	0	0	0	0	0	0	3
1510141358	4	53	1	1	1	0	0	4	4	1	1	0	1	0	0	1	17	1	1	10.49	66.3	1	5	20	0.78	6.18	1.09624	2.64482	12	5.56	0	1	0	0	1	1	2
1510151371	4	58	0	1	1	1	1	3	1	0	0	1	2	0	1	2	16	1	0	14	67.6153	1	5	20	2.21502	4.75798	1.09624	2.64482	10.3	5.77802	1	0	0	0	1	1	2
1510161371	2	50	1	1	1	1	0	3	2	1	1	1	1	1	0	2	0	1	1	13.5	63.5	0	8	16	1.73	5.04	1.23	3.06	10.2	6.74	1	0	0	0	1	1	2
1510161372	4	58	1	1	1	1	0	4	2	1	1	0	2	0	1	1	24	1	1	5.17	73.1	1	5	20	0.5	2.62	1.71	0.75	6.2	8.35	0	0	1	0	1	0	2
1510161373	1	70	0	1	1	0	0	2	1	0	0	1	3	0	1	1	15	1	1	8.57	59.4	0	9	9	2.3	4.38	1.09624	2.64482	8.5	5.34	1	0	0	0	1	1	3
1510161374	1	68	1	1	1	1	0	3	1	0	0	1	1	0	1	1	26	1	1	3.86	73.2	0	8	8	1.01	3.4	1.09624	2.64482	6.7	7.56	0	0	0	0	0	0	3
1510161375	1	57	1	1	1	1	0	3	2	0	0	1	2	0	1	1	18	1	1	2.97	224.5	0	8	8	1.07	5.17	1.09624	2.64482	7.4	12.26	0	0	0	0	0	1	2
1510161376	4	64	0	0	1	1	1	1	1	0	0	1	1	0	0	1	11	1	0	10.6736	67.6153	1	6	24	1.03	4.47	1.09624	2.78	9.08664	5.77802	0	0	0	0	0	1	3
1510161377	1	41	1	1	1	1	0	4	2	1	1	0	3	1	1	2	0	1	1	12.95	51.7	1	6	6	2.9	5.37	1.09624	2.64482	9.4	5.77802	1	1	0	0	1	1	1
1510161378	4	72	1	1	1	1	0	2	1	0	0	1	3	0	1	1	23	1	1	8.92	274.5	1	6	24	3.88	4.72	0.83	2.29	9.2	18.45	1	0	1	0	1	1	3
1510211371	4	79	1	1	1	1	0	4	1	0	0	1	2	0	0	1	24	1	1	10.18	67.6153	1	6	24	2.21502	4.75798	1.09624	2.64482	7.4	5.77802	1	0	0	0	1	1	3
1510211372	4	68	0	1	1	1	1	1	1	0	0	1	3	0	1	1	12	1	0	6.91	101.7	1	6	24	3.08	4.56	0.88	2.61	6.9	9.8	1	0	1	0	1	0	3
1510211373	4	60	0	0	1	1	0	4	1	0	0	1	2	0	1	3	12	1	0	17.88	67.6153	1	5	20	3.14	5.7	1.09624	2.64482	7.3	5.77802	1	1	0	0	1	1	3
1510211374	4	56	0	1	1	1	0	3	1	0	0	1	1	0	1	2	17	1	0	15.92	94.2	1	6	24	2.38	4.65	0.9	2.86	11.8	6.46	1	0	1	0	1	1	2
1510211375	4	53	1	1	1	1	0	4	2	0	1	1	2	0	1	1	10	1	1	6.69	74.6	1	5	20	2.51	5.47	1.04	3.47	8.2	7.38	1	1	0	1	1	1	2
1510211376	4	67	0	1	1	1	0	3	1	0	0	1	1	0	1	1	7	0	1	9.49	44	1	6	24	2.61	4.57	1.36	2.42	10.6	4.76	1	0	0	0	1	1	3
1510211377	4	72	0	1	1	1	0	2	1	0	0	1	2	0	1	1	21	1	1	5.25	52.5	1	6	24	0.91	2.61	1.09624	2.64482	11.5	5.95	0	0	0	0	0	1	3
1510211378	4	50	0	0	1	1	0	4	2	0	0	1	1	0	1	1	2	1	0	10.08	39.6	1	5	20	2.64	4.51	0.97	2.87	8	4.95	1	0	1	0	1	1	2
1510231351	4	51	1	0	1	0	1	2	1	0	0	0	1	1	0	3	0	1	0	17.01	55.1	1	3	12	1.84	5.03	1.09624	2.64482	11.8	5.77802	1	0	0	0	1	1	2
1510231352	1	69	1	1	1	1	0	3	4	1	1	0	1	0	1	1	38	1	1	5.73	70.4	0	8	8	1.29	3.03	0.8	1.79	8.4	4.64	0	0	1	0	1	1	3
1510231353	4	54	1	1	1	1	0	4	5	0	0	0	3	0	1	1	7	1	1	6.7	67.3	1	3	12	0.58	2.24	1.07	0.96	7.1	5.97	0	0	0	0	0	1	2
1510231354	1	54	1	1	1	1	0	4	4	1	1	0	2	0	1	1	15	1	1	10.09	75.6	0	8	8	1.31	2.4	0.67	1.43	8.1	4.33	0	0	1	0	1	1	2
1510231355	4	41	0	1	1	1	0	4	4	0	0	0	1	0	0	2	0	1	0	13.04	44.3	1	4	16	1.15	3.86	1.1	2.36	10.2	2.04	0	0	0	0	0	1	1
1510231356	4	45	0	1	0	1	1	3	1	0	0	0	2	0	1	1	22	1	1	11.02	78.4	1	8	32	4.87	4.35	0.99	1.8	11.4	6.56	1	0	1	0	1	1	2
1510231357	4	51	1	1	1	1	0	4	5	0	1	0	3	1	1	1	1	1	0	8.63	67.6153	1	8	32	2.44	5.31	1.09624	2.64482	7.4	5.77802	1	1	0	0	1	1	2
1510241371	1	37	1	0	1	1	0	3	2	1	1	0	2	0	1	1	20	1	0	7.67	99.6	0	8	8	2.69	4.37	1.15	2.33	10.5	7.02	1	0	0	0	1	1	1
1510241372	4	35	1	0	1	1	0	4	2	1	0	0	3	0	0	2	2	1	0	12.07	58.3	1	7	28	10.14	4.93	0.2	0.98	9.2	5.97	1	0	1	0	1	1	1
1510241373	4	60	1	0	1	1	0	4	1	0	0	1	2	0	1	1	20	1	1	8.87	71.5	1	7	28	0.61	2.51	0.98	1.27	7.6	6.21	0	0	1	0	1	1	3
1510241374	4	67	0	1	1	1	0	2	1	0	0	1	2	0	1	2	8	1	0	14.03	67.6153	1	6	24	5.97	7.3	1.09624	2.64482	9.08664	5.77802	1	1	0	0	1	1	3
1510241375	1	58	1	1	1	1	0	3	1	1	0	1	1	1	0	1	0	0	0	10.2	39.4	0	7	7	0.99	3.57	1.09624	2.64482	9.9	6.33	0	0	0	0	0	1	2
1510241376	4	70	0	1	1	1	1	1	1	0	0	1	3	1	0	1	0	0	0	5.23	47	1	6	24	2.29	4.87	1.2	2.89	5.5	4.08	1	0	0	0	1	0	3
1510241377	3	50	1	1	1	1	0	4	2	1	0	0	2	0	0	1	12	0	0	5.82	55.1	0	7	21	0.93	4.5	1.05	2.85	5.7	3.99	0	0	0	0	0	0	2
1510281351	4	70	0	1	1	0	0	3	5	0	0	1	1	0	1	1	12	1	1	5.5	46.7	1	5	20	1.42	3.64	1.25	2.01	7	5.47	0	0	0	0	0	1	3
1510281352	4	53	0	1	1	1	0	2	3	0	0	0	1	0	1	2	11	1	1	11.11	63	1	5	20	0.97	2.63	1.29	0.95	9.08664	4.32	0	0	0	0	0	1	2
1510281353	3	54	1	0	1	1	0	4	5	1	1	0	2	0	1	2	10	1	1	11.92	63.9	0	9	27	2.87	5.1	1.09	2.76	10.5	7.86	1	0	0	0	1	1	2
1510281354	1	53	1	0	1	0	1	2	2	1	0	0	3	0	1	1	0	1	0	8.1	68.2	0	9	9	10.08	5.27	0.46	0.77	7.6	3.96	1	1	1	0	1	1	2
1510281355	4	37	1	1	1	1	0	3	5	1	0	0	1	1	1	1	0	1	1	10.58	58.3	1	9	36	3	3.99	0.81	2.1	12	3.42	1	0	1	0	1	1	1
1510281356	4	66	0	1	0	1	0	3	4	0	0	1	1	0	1	1	28	1	1	6.86	49.2	1	4	16	1.69	3.76	1.28	1.88	7.7	5.57	0	0	0	0	0	1	3
1510301371	4	36	0	1	1	1	0	3	2	0	0	1	1	0	0	1	3	1	1	4.95	45.3	1	6	24	1.02	3.78	0.9	2.21	5.9	7.3	0	0	1	0	1	0	1
1510301372	1	29	0	1	1	1	0	3	1	0	0	1	1	0	0	2	1	1	0	12	37.7	0	8	8	1.48	3.49	0.9	2.13	9.4	4.76	0	0	1	0	1	1	1
1510301373	4	62	0	0	1	1	1	1	1	0	0	1	1	0	1	2	17	1	0	12.28	43.4	1	5	20	1.56	4.01	1.08	2.31	10.5	5.37	0	0	0	0	0	1	3
1510301374	4	55	1	1	1	1	0	3	2	0	0	1	1	0	0	1	8	1	0	6.26	64.7	1	6	24	0.72	2.33	1.16	0.86	6.5	6.32	0	0	0	0	0	0	2
1510301375	1	54	1	0	1	0	1	3	2	1	0	1	1	1	0	2	0	0	0	13.83	42.7	0	7	7	1.2	2.75	0.71	1.48	15.3	6.55	0	0	1	0	1	1	2
1511031351	4	56	1	1	1	1	0	4	5	0	0	0	1	0	0	3	10	1	1	23.67	44.7	1	5	20	1.23	4.12	1	2.6	10.7	5.72	0	0	1	0	1	1	2
1511031352	4	66	1	1	1	1	0	3	5	0	0	0	1	0	1	2	26	1	1	15.7	88.6	1	4	16	0.73	3.11	1.62	1.27	11	6.83	0	0	1	0	1	1	3
1511031353	4	60	0	1	1	0	0	3	3	0	0	0	1	0	0	1	6	1	0	4.98	58	1	4	16	3.06	6.64	1.45	3.99	10.4	5.89	1	1	0	1	1	1	3
1511031354	4	71	0	1	1	1	0	3	4	0	0	1	2	0	1	1	1	1	0	6.17	37.4	1	3	12	1.14	3.43	1.26	1.7	6.8	5.12	0	0	0	0	0	0	3
1511031355	4	48	0	1	1	1	0	3	2	0	0	0	3	0	1	1	18	1	0	9.85	40.6	1	8	32	2.41	4.83	1.13	2.95	9.7	3.15	1	0	0	0	1	1	2
1511061721	1	36	1	1	1	1	0	3	2	1	0	0	3	0	1	1	2	0	1	8.87	65.5	0	7	7	1.69	4.05	0.77	2.57	12.9	5.39	0	0	1	0	1	1	1
1511061722	1	74	0	1	1	1	0	2	1	0	0	1	1	0	1	1	30	1	1	8.14	56.3	0	9	9	1.99	3.12	1.09624	2.64482	8.5	9	1	0	0	0	1	1	3
1511061723	4	58	1	0	1	1	0	4	2	0	0	0	1	0	0	2	11	1	1	13.4	72.5	1	6	24	0.88	3.92	1.17	2.14	8.5	8.71	0	0	0	0	0	1	2
1511061724	4	73	1	1	1	0	0	3	1	0	0	1	2	0	1	1	8	1	1	5.18	76.3	1	6	24	0.89	2.7	0.79	1.58	7.5	6.8	0	0	1	0	1	1	3
1511061725	4	43	1	1	1	1	0	3	2	0	0	1	3	0	1	1	4	1	1	8.75	41.7	1	6	24	4.37	5.6	0.99	2.93	9.7	7.02	1	1	1	0	1	1	1
1511061726	4	47	1	1	1	1	0	3	2	1	0	1	1	0	0	2	23	1	1	13.09	60.6	1	6	24	0.63	3.48	1.09624	2.64482	9	5.83	0	0	0	0	0	1	2
1511061727	1	71	0	0	1	1	1	1	1	0	0	1	1	0	1	1	10	1	1	10.57	45.3	0	7	7	1.79	3.81	1.01	2.27	10	4.97	1	0	1	0	1	1	3
1511061728	4	56	0	1	1	1	0	3	2	0	1	1	1	0	1	1	10	1	1	8.75	53.4	1	6	24	2.19	5.13	1.45	2.97	7.5	5.15	1	0	0	0	1	1	2
1511081341	4	59	1	1	1	0	1	3	1	0	0	0	2	0	1	2	26	1	1	11.81	114.2	1	10	40	2.25	3.66	0.92	1.82	11.3	8.75	1	0	1	0	1	1	2
1511081342	4	44	0	0	1	1	0	3	4	0	1	0	2	0	1	2	11	1	1	11.33	32.4	1	5	20	2.41	5.7	1.09624	2.64482	9.08664	4.42	1	1	0	0	1	1	1
1511081351	4	61	1	1	1	1	0	4	4	0	0	0	1	1	0	1	1	0	0	9.64	49.2	1	6	24	0.73	2.21	1.09624	2.64482	9.9	2.8	0	0	0	0	0	1	3
1511081362	4	63	0	0	0	1	0	1	2	0	0	1	2	0	1	1	14	1	0	5.58	67.5	1	3	12	1.16	4.04	0.92	2.3	5.9	5.12	0	0	1	0	1	0	3
1511101721	4	27	0	1	1	1	0	4	2	0	0	1	2	1	0	2	0	0	0	13	67.6153	1	6	24	2.21502	4.75798	1.09624	2.64482	9.7	5.77802	1	0	0	0	1	1	1
1511101722	1	36	1	1	1	0	0	4	2	1	1	0	3	1	1	2	0	1	0	15.07	57	0	7	7	2.05	4.41	1.02	2.75	12.4	6.63	1	0	1	0	1	1	1
1511101723	1	69	0	1	1	1	0	1	1	0	0	1	1	0	0	1	6	1	0	8.62	39.4	0	8	8	3.5	4.8	0.97	2.44	8.5	3.81	1	0	1	0	1	1	3
1511101725	4	47	1	1	1	1	0	3	2	1	0	1	2	0	0	2	12	1	1	12.61	62.7	1	6	24	0.9	4.05	0.92	2.73	8.1	6.2	0	0	1	0	1	1	2
1511101726	4	42	1	1	1	1	0	4	2	0	0	0	2	1	1	1	0	1	0	8.46	82.9	1	6	24	2.27	3.47	0.94	1.88	7.1	8.06	1	0	1	0	1	1	1
1511101727	1	54	0	0	1	1	0	3	1	0	0	1	2	1	0	1	0	1	0	8.2	67.6153	0	8	8	2.21502	4.75798	1.09624	2.64482	11.9	5.77802	1	0	0	0	1	1	2
1511121341	3	53	0	1	1	1	1	3	2	0	0	1	2	0	1	1	6	1	0	9.57	49.8	1	8	24	1.66	3.17	1.09624	2.64482	11.8	2.37	0	0	0	0	0	1	2
1511121372	4	64	1	1	1	1	0	4	5	0	0	0	2	0	0	1	1	1	0	9.68	67.1	1	2	8	0.73	5.26	1.26	3.6	9.08664	5.79	0	1	0	1	1	1	3
1511121373	1	62	0	0	1	0	1	1	1	0	0	1	1	0	0	1	10	1	1	10.6736	34.9	0	3	3	1.35	4.91	1.09624	2.64482	17.8	5.09	0	0	0	0	0	1	3
1511131711	3	39	1	1	1	1	0	4	5	0	1	1	2	0	1	1	2	1	0	5	97.5	1	8	24	1.19	3.38	1.31	1.55	5.5	5.17	0	0	0	0	0	0	1
1511131712	4	52	1	1	1	1	0	4	5	1	1	0	2	0	1	1	4	1	1	8.51	95.7	1	6	24	2.57	4.09	0.9	2.25	6.9	5.32	1	0	1	0	1	0	2
1511131713	4	57	1	0	1	1	0	4	5	0	0	1	2	0	1	2	4	1	0	12.03	65.3	1	8	32	0.94	3	0.85	1.63	11.1	9.99	0	0	1	0	1	1	2
1511131714	1	66	0	1	1	1	0	1	3	0	0	0	3	0	1	1	20	1	1	6.1	62	0	9	9	1.12	3.73	1.43	1.85	6.4	9.99	0	0	0	0	0	0	3
1511131715	3	47	1	1	1	1	0	4	5	1	1	0	2	1	1	1	0	0	1	6	67.6153	0	4	12	2.21502	4.75798	1.09624	2.64482	9.7	5.77802	1	0	0	0	1	1	2
1511131716	4	58	1	1	1	1	0	2	3	1	1	0	2	0	1	1	20	1	1	6.67	157.4	1	5	20	2.4	8.05	1.38	4.91	10.4	8.57	1	1	0	1	1	1	2
1511131717	1	72	0	1	1	1	0	2	4	0	0	1	1	0	0	2	14	0	1	13.74	47.9	0	6	6	0.84	5.08	1.06	3.46	10.1	5.35	0	0	0	1	1	1	3
1511131718	4	56	0	0	1	1	0	4	5	1	1	0	2	0	1	1	14	1	1	7.99	63.8	1	8	32	2.16	4.84	1.09624	2.64482	6.4	4.96	1	0	0	0	1	0	2
1511141371	4	55	0	1	1	1	0	3	2	0	0	1	1	0	0	2	17	1	1	12.22	37.3	0	3	12	2.65	4.56	1.09624	2.64482	9.9	4.24	1	0	0	0	1	1	2
1511151352	1	71	0	1	1	0	1	2	1	0	0	0	2	0	1	3	6	1	0	16.9	67.6153	1	3	3	2.21502	4.75798	1.09624	2.64482	12.9	5.77802	1	0	0	0	1	1	3
1511151353	4	70	1	1	1	1	0	3	4	0	0	0	2	0	0	1	13	1	1	4.04	60.8	1	3	12	1.1	2.49	1.09624	2.64482	6.4	5.5	0	0	0	0	0	0	3
1511151374	1	51	0	1	1	1	0	3	3	0	0	0	2	1	1	1	1	1	0	2.4	40.6	0	2	2	1.35	4.75798	1	1.48	10.4	4.19	0	0	1	0	1	1	2
1511171721	4	53	1	1	1	1	0	3	2	1	0	1	2	0	0	1	12	1	1	9.84	139.5	1	6	24	1.68	3.21	0.95	1.76	12	8.08	0	0	1	0	1	1	2
1511171722	4	57	0	0	1	1	1	1	1	0	0	1	2	0	1	1	5	1	0	8.17	54.4	1	6	24	3.43	4.04	0.88	1.62	10.2	4.21	1	0	1	0	1	1	2
1511171724	4	48	1	0	1	1	1	1	2	1	0	1	1	0	0	1	13	1	1	9.29	47.8	1	5	20	0.51	3.86	1.12	2.26	10.1	8.85	0	0	0	0	0	1	2
1511171725	4	73	1	1	1	1	0	3	1	1	1	1	2	0	1	1	20	1	1	5.85	71.2	1	7	28	2.37	4.56	1.09624	2.64482	6	5.85	1	0	0	0	1	0	3
1511171726	4	28	1	0	1	1	0	4	2	0	0	1	3	0	0	1	4	1	0	10.98	51.6	1	6	24	6.2	4.56	1.09624	2.64482	13.2	4.89	1	0	0	0	1	1	1
1511171727	4	85	1	1	1	1	0	3	1	0	0	1	1	0	1	1	35	1	1	5.94	98.9	1	8	32	0.67	2.56	1.02	1.23	6.7	9.98	0	0	1	0	1	0	3
1511171728	4	53	1	1	1	1	0	4	2	1	0	0	3	0	1	1	6	1	0	8.21	63.6	1	6	24	0.84	4.44	1.09624	2.64482	8.4	12.02	0	0	0	0	0	1	2
1511171729	4	62	0	1	1	1	0	3	1	0	0	1	1	0	0	1	3	1	1	3.05	54.3	1	5	20	1.06	5.36	1.31	3.34	11.2	4.86	0	1	0	0	1	1	3
1511181721	3	51	1	1	1	1	0	3	1	1	1	1	2	0	0	1	20	1	1	7.39	63.6	1	8	24	0.99	3.14	1.05	1.6	7.1	6.03	0	0	0	0	0	1	2
1511181722	4	67	1	1	1	1	0	4	1	1	0	1	1	0	1	1	23	1	1	6.64	74.4	1	7	28	0.9	3.44	1.01	1.97	11.5	4.71	0	0	1	0	1	1	3
1511191371	1	33	0	1	0	1	0	3	3	0	0	0	1	1	0	1	1	0	0	8.13	27.5	0	2	2	1.01	3.54	1.09624	2.64482	9.08664	1.15	0	0	0	0	0	1	1
1511191372	4	67	1	1	1	1	0	3	4	0	0	1	1	1	1	1	1	1	1	9.55	46.4	1	4	16	2.63	7.31	1.09624	2.64482	14	3.95	1	1	0	0	1	1	3
1511191373	4	63	1	1	1	1	0	3	4	1	0	0	2	0	1	1	16	1	1	10.4	53.5	1	2	8	1.59	4.76	1.09624	2.64482	8.2	4.84	0	0	0	0	0	1	3
1511191374	4	44	1	0	1	1	1	2	2	1	0	0	2	1	0	1	1	1	0	5.79	65.5	1	2	8	1.36	3.84	1.09624	2.64482	6.2	5.33	0	0	0	0	0	0	1
1511201351	4	49	1	1	1	1	0	4	4	1	1	1	2	0	1	1	9	1	1	10.97	60.7	1	5	20	1.46	3.71	1.09624	2.64482	7.7	4.57	0	0	0	0	0	1	2
1511201352	4	55	1	1	1	0	0	3	3	0	0	0	2	0	0	1	20	0	0	7.15	64.5	1	5	20	0.84	3.54	1.09624	2.64482	9.9	3.81	0	0	0	0	0	1	2
1511201371	4	74	1	0	1	1	0	2	4	0	0	0	2	0	1	1	16	1	1	9.2	62.6	1	4	16	1.33	4.08	1.03	2.31	8.5	5.98	0	0	1	0	1	1	3
1511201372	4	64	1	1	1	1	0	3	3	1	1	1	1	0	0	1	15	1	0	8.31	56.8	1	2	8	1.8	4.31	0.82	2.73	13.3	6.57	1	0	1	0	1	1	3
1511201721	4	57	1	0	1	1	1	1	1	0	0	1	3	1	0	1	0	1	1	7.54	45.8	1	7	28	1	2.57	0.71	1.44	6.4	4.02	0	0	1	0	1	0	2
1511201722	4	68	0	1	1	1	1	1	1	0	0	1	3	0	0	2	25	1	0	13.95	60.3	1	6	24	1.68	5.05	1.04	3.09	10.9	8.52	0	0	0	0	0	1	3
1511201723	4	59	1	1	1	1	1	3	3	1	1	1	2	0	1	1	17	1	1	10.48	55.1	1	6	24	0.84	3.83	0.83	2.43	9.5	6.29	0	0	1	0	1	1	2
1511201724	1	29	1	1	1	1	0	3	2	0	0	0	2	0	0	1	0	1	0	10.34	55.6	0	7	7	1.05	4.5	1.02	3.02	12.2	9.66	0	0	1	0	1	1	1
1511201725	1	57	0	1	1	1	0	3	1	0	0	1	1	0	1	1	3	1	0	7.73	47.7	0	8	8	2.23	3.25	1.09624	2.64482	7.4	4.52	1	0	0	0	1	1	2
1511201726	1	48	1	1	1	1	0	4	2	0	1	0	2	0	0	1	7	1	0	5.98	65.6	0	8	8	1.97	4.39	0.82	2.92	8	3.77	1	0	1	0	1	1	2
1511201727	1	29	1	1	1	1	0	4	2	0	0	0	3	1	1	1	0	1	0	5.43	88	0	8	8	2.37	6.41	1.09624	2.64482	8.8	5.61	1	1	0	0	1	1	1
1511211342	1	59	1	1	1	1	0	3	4	1	0	0	3	1	0	1	1	1	0	10.8	59.4	1	7	7	1.64	3.27	1.09624	2.64482	9.4	4.55	0	0	0	0	0	1	2
1511231371	4	54	1	1	1	1	0	4	3	0	0	1	2	0	1	1	11	0	0	6.9	61	1	2	8	0.9	2.64	1.01	1.21	7.5	7.58	0	0	1	0	1	1	2
1511241721	4	35	1	1	1	1	0	4	2	1	0	0	1	0	1	1	3	1	1	4.08	79.4	1	6	24	0.91	5.7	1.48	3.43	8.5	7.63	0	1	0	1	1	1	1
1511241722	4	73	1	1	1	1	0	2	1	0	0	1	2	0	1	1	15	1	1	4.21	40.6	1	6	24	0.99	4.14	1.21	2.35	12.5	7.49	0	0	0	0	0	1	3
1511241723	1	44	1	1	1	1	0	3	2	0	0	0	3	1	1	2	0	1	0	15.91	64.1	0	8	8	5.65	4.04	0.69	0.81	11.9	5.81	1	0	1	0	1	1	1
1511241724	1	78	0	1	1	1	0	3	1	0	0	1	2	0	1	2	17	1	1	14.69	69.3	0	8	8	2.28	5.24	1.01	3.3	10.7	6.78	1	1	1	0	1	1	3
1511241725	1	51	1	1	1	1	0	4	2	0	0	1	2	0	1	3	15	1	0	19	41.4	0	8	8	1.1	2.96	0.58	1.93	10.7	2.82	0	0	1	0	1	1	2
1511241726	4	52	1	1	1	1	0	3	2	1	1	0	2	1	1	1	0	0	0	9.1	73.1	1	6	24	2.17	5.45	0.84	3.64	8.2	7.52	1	1	1	1	1	1	2
1511241727	4	67	0	1	1	1	0	2	1	0	0	1	1	0	1	1	20	1	0	9.05	36.1	1	6	24	1.33	4.53	1.36	2.59	9.4	5.1	0	0	0	0	0	1	3
1511241728	4	48	1	1	1	1	0	3	2	1	1	0	1	0	0	2	15	1	0	14.79	57.3	1	6	24	2.82	3.91	1.14	2.01	9.8	6.06	1	0	0	0	1	1	2
1511241729	1	46	0	1	1	1	0	4	2	0	0	1	1	0	1	2	15	1	1	12.76	54.9	0	7	7	5.96	4.73	1.09624	2.64482	8.2	5.07	1	0	0	0	1	1	2
1511261372	4	53	1	1	1	1	0	3	1	0	1	1	2	0	1	1	23	1	1	4.53	60.2	1	2	8	0.68	2.67	1.24	0.93	6.5	3.37	0	0	0	0	0	0	2
1511261373	1	43	1	1	1	1	0	2	4	1	1	0	1	0	0	1	17	0	1	6.14	57.9	0	3	3	0.71	4.26	1.09624	2.64482	11	7.63	0	0	0	0	0	1	1
1511261374	4	71	1	1	1	1	0	3	4	0	0	1	1	0	1	1	20	1	0	10.01	64.4	1	2	8	1.02	3.26	0.93	1.66	8.2	4.05	0	0	1	0	1	1	3
1511261375	2	56	0	1	1	0	1	3	1	0	0	0	1	0	1	1	12	1	1	10.53	57.7	1	3	6	2.68	6.28	1.09624	2.64482	11.2	6.92	1	1	0	0	1	1	2
1511261711	1	54	1	1	1	1	0	3	5	1	1	0	1	0	1	1	10	1	1	8.19	72.4	0	10	10	1.59	2.59	1.09624	2.64482	11.7	9.69	0	0	0	0	0	1	2
1511261712	4	61	1	1	1	1	0	3	2	0	1	0	2	0	0	2	0	0	0	13.36	120.9	1	6	24	2.58	7.25	1.09624	2.64482	10.4	5.77802	1	1	0	0	1	1	3
1511261713	4	57	1	1	1	1	0	3	5	0	0	1	2	0	1	1	10	1	0	4.72	66.2	1	8	32	0.39	2.5	1.09624	2.64482	6.9	3.83	0	0	0	0	0	0	2
1511261714	3	57	1	0	1	1	0	2	3	1	1	1	1	0	1	1	13	0	1	10.66	77.8	1	8	24	2.08	4.44	1.06	2.46	9	5.03	1	0	0	0	1	1	2
1511261715	4	36	0	1	1	1	0	3	4	0	0	0	1	0	0	1	6	0	1	5.36	35.9	1	8	32	1.02	6.63	0.84	5.33	6.5	4.59	0	1	1	1	1	0	1
1511261716	4	56	0	1	1	1	0	4	5	0	0	0	1	0	0	1	10	1	0	8.46	57	1	6	24	1.23	4.27	1.28	2.32	6.9	5.92	0	0	0	0	0	0	2
1511261717	4	58	1	1	1	1	0	4	5	0	1	0	2	0	1	1	14	0	1	9.3	61.6	1	8	32	0.82	5.16	1.59	3.2	8.1	5.14	0	0	1	0	1	1	2
1511271371	4	64	0	1	1	1	1	2	1	0	0	1	1	1	1	1	1	1	0	5.99	32.8	1	3	12	2.14	2.87	1.09624	2.64482	5.8	2.57	1	0	0	0	1	0	3
1511271372	4	49	0	0	1	0	1	2	1	0	0	1	1	0	0	1	11	1	1	9.58	61.7	1	3	12	0.95	3.28	1.09624	2.64482	10.6	6.14	0	0	0	0	0	1	2
1511271721	1	43	1	1	1	1	0	4	2	1	0	0	2	0	0	1	1	1	0	8.19	68.5	0	8	8	1.58	3.59	1.01	2.1	7.7	5.64	0	0	1	0	1	1	1
1511271722	4	33	0	1	1	0	0	3	2	0	0	1	1	0	0	1	5	1	0	8.3	37.6	1	6	24	2.21502	4.75798	1.09624	2.64482	10.2	4.11	1	0	0	0	1	1	1
1511271723	4	56	1	1	1	1	0	3	1	1	0	0	2	0	1	1	10	1	1	7.6	58.5	1	6	24	1.79	5.91	1.08	3.9	9.4	3.95	1	1	0	1	1	1	2
1511271724	4	57	0	1	1	0	1	3	1	0	0	1	2	0	1	1	14	1	1	5.54	48.1	1	6	24	2.21502	4.75798	1.09624	2.64482	10.1	4.78	1	0	0	0	1	1	2
1511271725	4	58	0	1	1	1	1	1	1	0	0	1	1	0	1	1	1	1	0	8.67	36	1	6	24	2.21502	4.75798	1.09624	2.64482	8.7	5.18	1	0	0	0	1	1	2
1511271726	1	52	0	0	1	0	1	2	1	0	0	1	3	0	0	2	13	1	1	12.36	35.5	0	9	9	0.89	4.25	1.56	2.27	9.08664	6.71	0	0	1	0	1	1	2
1511271727	1	69	0	0	1	0	1	1	1	0	0	1	2	0	1	1	20	1	1	5.51	51.8	0	8	8	2.09	3.92	1.09624	2.64482	9.7	5.5	1	0	0	0	1	1	3
1511271728	4	53	1	1	1	1	0	3	2	1	1	0	3	0	1	1	15	1	0	10.39	66.4	1	6	24	1.34	2.65	1.12	1.1	8.5	5.04	0	0	0	0	0	1	2
1511271729	3	50	1	1	1	1	0	4	2	1	1	0	3	0	1	1	2	1	0	5.11	66.9	1	7	21	2.21502	4.75798	1.09624	2.64482	5.9	5.73	1	0	0	0	1	0	2
1512031371	4	69	1	1	1	1	0	4	4	0	0	1	1	0	1	1	22	1	1	8.97	258.8	1	3	12	2.17	3.4	1.09624	2.64482	12.7	9.9	1	0	0	0	1	1	3
1512031372	4	50	0	1	1	1	1	4	4	0	0	1	1	0	1	2	4	1	0	13.15	31.8	1	2	8	1.54	3.95	1.09624	2.64482	10.5	6.9	0	0	0	0	0	1	2
1512031373	4	34	1	1	1	1	0	4	5	1	0	0	3	1	0	1	1	1	0	9.91	62.6	1	2	8	1.62	3.82	1.09624	2.64482	10.2	5.92	0	0	0	0	0	1	1
1512031374	4	39	1	1	1	0	1	3	2	0	0	1	1	0	0	1	15	1	0	10.74	66.9	1	2	8	0.61	3.73	1.36	1.97	9.08664	6.71	0	0	0	0	0	1	1
1512031375	1	49	1	1	1	1	0	3	4	0	0	0	3	0	1	2	1	1	0	15.54	75.5	0	3	3	1.39	2.46	1.09624	2.64482	11.3	5.56	0	0	0	0	0	1	2
1512041371	1	66	0	1	1	1	0	3	3	1	0	1	2	0	1	1	11	1	0	6.54	43.8	0	3	3	2.4	4.1	1.09624	2.64482	10.6	5.03	1	0	0	0	1	1	3
1512041372	4	70	1	1	1	1	0	3	1	0	0	1	2	0	1	1	16	1	1	9.32	78.7	1	4	16	1.97	3.82	1.09624	2.64482	8.8	4.68	1	0	0	0	1	1	3
1512041373	4	55	1	1	1	0	1	3	2	1	0	1	2	0	1	1	11	1	1	10.12	143	1	3	12	1.52	4.32	1.09	2.24	10.5	9.88	0	0	0	0	0	1	2
1512041374	1	75	1	1	1	1	0	4	1	1	1	1	1	0	0	1	8	1	1	8.92	69.6	0	5	5	0.89	2.92	0.71	1.44	11.6	4.21	0	0	1	0	1	1	3
1512101371	1	49	1	1	1	1	0	2	3	1	1	0	1	0	0	1	7	1	1	8.32	70.3	0	5	5	2.41	3.55	0.73	1.81	7.5	5.73	1	0	1	0	1	1	2
1512101372	1	32	1	0	1	1	0	4	4	0	0	0	2	1	0	2	1	0	0	15.69	58.3	0	4	4	1.1	4.1	0.96	2.58	9.08664	2.85	0	0	1	0	1	1	1
1512101373	4	51	0	1	1	1	0	3	4	0	0	1	2	0	0	1	5	1	0	5.75	51.5	1	3	12	1.94	4.76	1.09624	2.64482	7.2	3.32	1	0	0	0	1	1	2
1512101374	4	45	0	0	1	1	1	1	3	0	0	1	1	0	0	1	3	1	1	8.1	32.4	1	3	12	1.89	2.92	0.85	1.34	7.2	3.29	1	0	1	0	1	1	2
1512101375	3	54	1	0	1	1	0	3	5	1	0	0	1	0	1	1	8	1	1	10.04	77.5	1	2	6	1.92	4.14	0.71	2.34	11.2	3.69	1	0	1	0	1	1	2
1512101376	4	48	1	0	1	0	1	1	2	1	0	1	1	0	0	2	6	1	0	14.26	45.6	1	2	8	0.89	3.49	1.09624	2.64482	13.6	4.32	0	0	0	0	0	1	2
1512111371	3	47	1	1	1	1	0	3	4	1	0	0	1	0	0	2	5	1	0	12	51.3	1	2	6	1.01	4.18	1.45	2.03	9.08664	6.41	0	0	0	0	0	1	2
1512111372	4	45	0	1	1	1	0	3	3	0	0	1	3	0	1	1	11	1	1	4.77	63.1	1	3	12	1.58	4.69	1.09624	2.64482	7.3	3.19	0	0	0	0	0	1	2
1512111373	4	56	0	1	1	1	0	4	4	0	0	1	2	0	1	1	8	1	0	5.29	61.7	1	4	16	2.17	3.73	0.97	1.76	7.1	3.07	1	0	1	0	1	1	2
1512111374	4	65	0	1	1	1	1	2	3	0	0	1	1	0	1	1	11	1	1	6.43	40.1	1	5	20	1.54	2.48	0.91	0.91	9.1	3.37	0	0	1	0	1	1	3
1512111375	3	45	0	0	1	1	0	4	5	0	0	0	1	0	0	1	6	1	0	6.83	43.8	1	7	21	10.23	4.62	0.33	0.51	7.9	3.29	1	0	1	0	1	1	2
1512111376	4	57	0	1	1	1	0	3	3	0	0	1	3	0	1	1	16	1	0	6.34	49.7	1	3	12	2.45	4.34	1.09624	2.64482	6.9	4.56	1	0	0	0	1	0	2
1512171371	1	54	0	0	1	1	0	3	3	0	0	1	1	0	0	2	13	1	0	12.08	46.4	0	4	4	1.32	4.63	0.95	2.96	9.9	5.34	0	0	1	0	1	1	2
1512171372	4	64	1	1	1	1	0	3	3	1	1	0	2	0	1	1	11	1	1	8.16	59	1	3	12	1.54	3.99	1.09624	2.15	6.5	6.75	0	0	0	0	0	0	3
1512171373	4	58	0	1	1	1	0	3	2	0	0	1	1	0	1	1	5	1	1	4.7	49.4	1	3	12	1.19	6.8	1.26	4.17	8	4.25	0	1	0	1	1	1	2
1512171374	1	65	0	0	1	1	0	2	2	0	0	1	1	0	1	1	13	1	1	10.5	55	0	5	5	2.21502	4.75798	1.09	2.64482	10.6	4.13	1	0	0	0	1	1	3
1512171375	4	74	0	1	1	1	0	3	1	0	0	1	1	0	1	1	6	1	0	6.91	44.9	1	5	20	1.86	5.65	0.81	3.39	7.4	2.48	1	1	1	1	1	1	3
1512171376	4	46	1	1	1	1	0	3	4	0	0	1	1	0	1	1	3	1	0	7.5	59.3	1	3	12	1.37	5.14	0.87	3.04	8.4	4.22	0	0	1	0	1	1	2
1512171377	4	51	1	1	1	1	0	4	4	0	1	1	3	0	1	1	1	0	0	6.5	63.3	1	3	12	1.45	3.39	0.69	1.94	6.7	5.77802	0	0	1	0	1	0	2
1512191351	4	56	1	1	1	1	0	4	4	0	0	0	1	1	0	1	1	0	0	7.5	67.6153	1	7	28	2.21502	4.75798	1.09624	2.64482	9.08664	5.77802	1	0	0	0	1	1	2
1512191352	4	73	1	0	0	1	1	2	3	0	1	0	3	0	1	1	11	1	1	7.86	62.7	1	5	20	1.59	4.29	1.24	2.35	7.6	6.89	0	0	0	0	0	1	3
1512191353	1	39	1	1	1	1	0	4	5	0	0	0	3	0	1	1	1	1	1	7.03	88.3	1	5	5	2.65	3.89	1.09624	2.64482	9.08664	4.38	1	0	0	0	1	1	1
1512191354	4	53	1	1	1	1	0	4	5	0	0	0	2	0	0	1	2	1	0	5.65	64.2	1	8	32	2.42	3.48	0.68	1.96	6.3	4.23	1	0	1	0	1	0	2
1512211371	1	34	1	1	1	1	0	4	5	1	0	0	2	1	0	1	1	0	0	10.1	67.6153	0	5	5	2.21502	4.75798	1.09624	2.64482	8.2	5.77802	1	0	0	0	1	1	1
1512211372	3	47	0	1	1	1	0	2	3	0	0	1	1	0	1	1	11	1	1	6.76	51.2	1	3	9	2.95	4.27	1.04	1.88	9.8	4.27	1	0	0	0	1	1	2
1512211373	4	63	0	1	1	0	1	1	2	0	0	1	2	0	1	1	31	1	1	8.77	69.2	1	3	12	1.35	5.58	1.22	3.21	10.5	8.99	0	1	0	0	1	1	3
1512211374	1	52	1	1	1	1	0	4	4	0	1	1	2	0	1	1	11	1	0	5.15	134.7	1	5	5	1.91	2.78	0.95	1.1	6.4	8.27	1	0	1	0	1	0	2
1512211375	4	57	1	0	1	1	0	4	4	1	1	1	3	0	1	1	14	1	1	8.66	65.7	1	3	12	2.1	6.13	1.09624	2.64482	8.1	7.5	1	1	0	0	1	1	2
1512241371	4	61	1	1	1	1	0	4	4	1	1	1	1	0	1	1	12	1	0	3.51	64.6	1	3	12	0.97	3.45	1.29	1.72	6.1	6	0	0	0	0	0	0	3
1512241372	1	56	1	1	1	0	1	3	3	1	1	0	3	0	1	1	14	1	1	6.94	85.1	0	3	3	2.72	4.16	0.69	2.07	8.7	5	1	0	1	0	1	1	2
1512241373	1	49	0	1	1	1	0	4	5	0	1	0	1	0	0	2	11	1	0	11.89	42.3	0	10	10	1.36	5.4	0.93	3.22	11.6	3.96	0	1	1	0	1	1	2
1512241374	4	51	0	0	1	0	1	1	2	0	0	1	3	0	1	2	15	1	1	14.29	43.5	1	5	20	3.95	7.74	1.09624	2.64482	11.3	3.22	1	1	0	0	1	1	2
1512241375	4	56	0	1	1	1	0	4	2	0	0	1	2	0	1	1	9	1	1	5.73	50.6	1	4	16	0.91	3.62	0.81	1.99	6.7	5.67	0	0	1	0	1	0	2
1512281371	4	54	0	1	1	1	1	3	3	0	0	1	1	0	1	1	4	1	0	10.15	58.3	1	3	12	1.9	4.23	0.9	2.11	9.3	5.56	1	0	1	0	1	1	2
1512281372	4	54	1	1	1	0	1	2	3	0	1	1	1	0	0	1	8	1	1	9.2	47.7	1	2	8	1.65	3.66	1.09624	2.64482	11	4.41	0	0	0	0	0	1	2
1512281373	4	53	1	1	1	1	0	4	4	1	1	1	2	0	1	1	3	1	1	9.73	100.6	1	5	20	1.11	4.12	1.01	2.39	7.3	5.28	0	0	1	0	1	1	2
1512281374	4	52	1	0	1	0	1	2	3	1	0	1	1	0	0	1	15	1	1	8.48	36.7	1	3	12	1.04	5.56	1.09624	2.64482	10.3	6.56	0	1	0	0	1	1	2
1601131541	1	68	0	1	1	0	1	2	2	0	0	1	1	0	1	1	2	1	0	5.7	77.5	1	3	3	1.31	4	1.07	3.1	5.4	6.1	0	0	0	0	0	0	3
1604081531	3	64	1	1	1	0	1	2	3	1	1	0	3	1	1	2	0	1	0	15.1	62.8	1	2	6	2.47	5.3	1.05	4.02	11.2	5.3	1	1	0	1	1	1	3
1604081532	3	57	1	1	1	0	1	2	4	1	0	0	2	0	1	2	2	1	1	12.9	63.3	1	5	15	22.79	6.4	1.17	2.76	8.4	5.9	1	1	0	0	1	1	2
1604231531	4	67	0	1	1	0	1	1	3	0	0	1	3	0	1	3	14	1	1	20	141.4	1	2	8	1.9	6.1	1.8	4.19	9.5	7.1	1	1	1	1	1	1	3
1604231532	2	66	0	1	1	0	1	2	2	0	0	1	3	0	1	2	3	1	1	14.6	50.6	1	3	6	4.24	5.2	1.24	3.49	9.08664	5.6	1	1	0	1	1	1	3
1605041531	3	65	1	1	1	0	1	2	3	0	0	0	3	0	1	2	5	1	1	15.1	90.9	1	3	9	3.01	3	0.96	1.84	8	6.7	1	0	1	0	1	1	3
1605041532	3	67	0	1	1	0	1	1	3	0	0	0	3	0	1	1	2	1	1	7.1	74.5	1	3	9	2.38	4.7	1.09	3.41	6.1	3.7	1	0	0	1	1	0	3
1605061532	4	62	1	1	1	1	0	3	4	0	1	0	2	0	0	1	2	1	1	11.05	73.3	1	2	8	1.66	4	1.07	2.99	9.9	4.1	0	0	0	0	0	1	3
1605061538	3	64	1	1	1	0	1	1	3	0	0	0	2	0	1	2	2	1	1	11.5	67.6153	1	2	6	2.21502	4.75798	1.09624	2.64482	5.4	5.77802	1	0	0	0	1	0	3
1605071531	2	56	1	0	1	1	1	3	4	0	0	0	2	0	1	3	2	0	0	19.6	73.1	1	3	6	3.7	3.5	0.97	2.67	12	5.6	1	0	1	0	1	1	2
1605071532	1	35	1	1	1	1	1	3	5	1	1	0	2	0	1	1	3	1	1	11.1	63.3	0	5	5	2.13	3.4	0.96	2.47	8.7	5.4	1	0	1	0	1	1	1
1605081531	1	61	1	1	1	1	0	4	4	0	0	0	3	0	1	2	6	0	0	11.3	86.2	0	4	4	0.73	3.2	1.44	1.94	9.7	4.5	0	0	0	0	0	1	3
1605081532	1	61	0	1	1	1	0	3	5	0	0	0	3	0	1	1	10	1	0	6.2	63.9	0	4	4	2.05	3.5	0.97	2.41	5.4	3.6	1	0	1	0	1	0	3
1605131531	2	65	0	1	1	0	1	1	2	0	0	1	1	0	1	1	0	1	0	5.5	56.9	0	3	6	2.38	4.7	1.43	2.59	6.9	7.1	1	0	0	0	1	0	3
1605141531	1	56	1	0	1	0	1	2	2	0	0	0	2	0	1	1	1	1	0	7.7	67.3	0	6	6	1.43	2.3	0.98	1.4	6.1	4.9	0	0	1	0	1	0	2
1605151531	2	68	1	1	1	1	0	3	4	0	0	0	2	0	1	1	17	1	1	7.2	65	1	4	8	1	3.1	1.1	2.15	6	4.1	0	0	0	0	0	0	3
1605201531	3	63	0	1	1	0	1	1	3	0	0	0	2	0	1	2	12	1	1	11.4	43.2	1	4	12	1.78	5.2	1.43	3.72	10.4	7.2	1	1	0	1	1	1	3
1605201532	1	43	1	1	1	1	0	4	4	0	0	0	2	1	1	2	0	1	0	15.6	75.2	0	5	5	2.54	2.8	0.92	1.76	10.7	3.8	1	0	1	0	1	1	1
1605201533	2	65	0	1	0	1	0	1	3	0	0	0	3	0	1	2	7	1	1	13.8	51.3	1	3	6	2.21	4.7	1.17	3.08	9.6	7.1	1	0	0	0	1	1	3
1605201534	2	48	1	1	0	1	1	2	3	0	0	0	3	1	0	1	0	0	0	6.7	75.7	0	4	8	1.52	5.1	1.22	3.82	9.9	4.2	0	0	0	1	1	1	2
1605201535	2	53	1	1	1	1	1	2	3	0	0	0	2	0	1	2	4	1	1	12.7	59.1	1	5	10	3.87	5.5	1.38	3.72	8.3	7.6	1	1	0	1	1	1	2
1605201541	1	76	1	1	1	0	1	2	1	0	0	1	2	0	0	1	8	1	0	7.3	108.9	1	6	6	1.06	2.8	0.88	2.04	6.7	9.9	0	0	1	0	1	0	3
1605211541	2	76	1	1	1	0	1	1	1	0	0	1	3	0	1	2	8	1	1	15.9	99.4	1	4	8	5.15	3.6	1.14	1.93	8.2	9.9	1	0	0	0	1	1	3
1605221541	2	63	0	1	1	0	1	1	3	0	0	1	3	0	0	1	0	1	0	8.1	64.7	1	3	6	1.59	3.3	1.16	2.08	7.2	5.3	0	0	0	0	0	1	3
1605231531	1	58	1	1	1	0	1	2	3	0	0	0	2	0	1	1	10	1	1	10.1	71.7	0	6	6	0.78	2.8	1.06	1.83	7.2	4.9	0	0	0	0	0	1	2
1605231532	2	71	0	1	0	0	1	1	3	0	0	1	3	0	1	1	6	1	0	10.1	71.7	1	4	8	2.02	5.6	1.57	3.77	7.4	4.9	1	1	1	1	1	1	3
1605301541	1	38	1	1	1	1	0	3	3	1	0	0	1	0	0	1	1	1	0	4.3	51.4	1	4.84314	4.84314	0.82	3	1.31	1.81	10	3.9	0	0	0	0	0	1	1
1605301542	3	46	1	0	1	1	0	4	5	0	1	0	2	0	0	3	12	1	1	17.9	56.6	1	1	3	1.39	4.5	1.86	2.81	9.2	5.4	0	0	1	0	1	1	2
1605301543	1	54	1	1	1	0	1	2	3	1	1	0	1	0	0	2	3	1	1	16.1	46.4	1	1	1	0.51	3.6	1.4	2.48	12	5.8	0	0	0	0	0	1	2
1605311531	2	47	1	0	1	1	1	1	3	1	0	0	1	0	0	1	3	1	1	7.8	29.2	1	4	8	0.88	1.5	0.56	1.06	6.7	2.4	0	0	1	0	1	0	2
1605311541	3	55	0	1	1	1	0	3	3	0	0	0	2	0	0	2	11	1	0	12.7	42.1	1	2	6	2.73	3.8	1.19	2.5	11.7	4	1	0	0	0	1	1	2
1606021531	2	68	0	1	1	0	1	1	3	0	0	1	1	0	1	1	1	1	0	8.1	64.7	1	5	10	1.59	3.3	1.16	2.08	7.2	5.3	0	0	0	0	0	1	3
1606041541	1	66	0	1	1	0	1	2	3	1	0	0	2	0	1	1	3	1	0	9.9	52.2	1	2	2	5.45	5.1	1.21	3	9.3	4.6	1	0	0	0	1	1	3
1606041542	4	63	0	1	1	1	0	2	3	0	0	0	2	0	1	1	10	1	0	8.3	60.8	1	1	4	2.05	4.5	1.33	3.17	8	6.2	1	0	0	0	1	1	3
1606081541	1	49	0	1	1	0	1	3	2	0	0	0	1	1	0	1	0	1	0	10.2	52.4	1	1	1	3.67	4.2	1.26	2.75	8.4	6.2	1	0	0	0	1	1	2
1606111531	3	66	1	1	1	1	0	3	4	0	0	0	2	0	1	1	13	1	1	10.9	113.3	1	3	9	2.13	6.4	1.21	4.95	11.3	7.1	1	1	0	1	1	1	3
1606161531	4	54	0	1	1	0	1	1	3	0	0	0	2	0	0	1	11	1	1	9.2	50.4	1	5	20	1.34	3.7	1.22	2.52	8	7.2	0	0	0	0	0	1	2
1606161532	3	60	0	1	1	0	1	1	2	0	0	0	2	0	1	1	11	1	1	4.6	70.1	1	4	12	2.58	4.6	1.26	3.08	7.6	6.1	1	0	0	0	1	1	3
1606171531	4	65	1	0	1	1	0	3	3	0	0	0	3	0	1	1	6	1	1	6.8	67.6153	1	5	20	2.03	4.8	1.15	3.46	7.7	5.77802	1	0	0	1	1	1	3
1606191531	4	48	1	1	0	1	1	1	3	0	0	0	3	1	0	1	0	1	0	10.9	67.2	1	1	4	0.69	2.2	0.99	1.3	12.1	3.6	0	0	1	0	1	1	2
1606191532	3	38	1	1	0	1	1	2	3	0	0	0	1	0	1	2	7	1	1	14.9	54.9	1	4	12	5.91	3.9	1.2	2.03	10.9	4.4	1	0	0	0	1	1	1
1606201531	3	55	1	1	1	0	1	2	3	0	0	0	2	1	0	3	0	1	0	37.1	62.9	1	3	9	2.41	4.9	1.51	3.33	12	5.3	1	0	0	0	1	1	2
1606231531	4	62	1	0	1	1	1	1	3	1	0	0	1	0	1	1	3	1	1	6.7	68.9	1	3	12	13.54	6	1.07	3.6	8.6	7.3	1	1	0	1	1	1	3
1606231532	4	66	0	0	1	0	1	1	3	0	0	0	2	0	1	2	23	1	1	15.4	97.6	1	3	12	1.31	2.7	1.59	1.18	6.6	6	0	0	1	0	1	0	3
1606241531	4	53	0	1	1	0	1	2	3	0	0	0	2	0	0	1	7	0	1	5.8	71.9	1	4	16	1.12	2.8	1.08	1.71	7	4.6	0	0	0	0	0	1	2
1606241532	4	57	0	0	1	1	1	1	3	0	0	0	1	0	1	1	19	0	1	4.1	133.8	1	3	12	1.16	4.6	1.4	3.31	7.4	9.9	0	0	0	0	0	1	2
1607151541	1	67	1	1	1	0	1	1	1	1	0	0	2	0	0	2	12	1	1	12.8	98	0	10	10	0.95	4.2	1.65	2.61	9.8	8.5	0	0	1	0	1	1	3
1607151542	1	66	0	1	1	1	0	2	4	0	0	1	1	0	0	2	1	1	0	14.7	93.2	1	5	5	4.82	3.1	0.94	1.59	7.5	7.6	1	0	1	0	1	1	3
1607151543	2	48	1	0	1	0	1	3	5	1	0	0	2	0	0	1	3	1	1	7.9	70.2	1	1	2	3.88	7.1	1.6	4.86	11.6	5.1	1	1	1	1	1	1	2
1607191541	1	54	1	1	1	0	1	3	3	1	1	0	2	1	1	1	0	1	0	7.4	66.1	0	2	2	4.46	4.2	1.24	2.36	5.2	3.8	1	0	0	0	1	0	2
1608151541	2	46	1	1	1	0	0	3	4	1	1	0	3	1	1	1	0	1	0	11.1	73.9	0	3	6	2.45	4.6	0.92	3.16	7.4	4.9	1	0	1	0	1	1	2
1608151542	3	44	1	1	1	0	1	3	3	0	0	0	1	0	0	3	21	0	0	25.2	62.7	0	2	6	0.68	4.1	1.74	2.4	9.2	6.7	0	0	1	0	1	1	1
1608151543	1	28	1	1	1	1	1	3	4	0	0	0	3	1	1	3	0	0	0	19.6	71.1	0	4	4	9.11	6.6	1.9	1.83	8	5.8	1	1	1	0	1	1	1
1608161541	3	53	1	1	1	0	0	3	4	1	1	0	2	1	1	2	0	0	0	16	75.1	1	2	6	2.64	5.6	1.21	3.95	8.5	7.4	1	1	0	1	1	1	2
1608161542	2	56	0	0	1	0	1	3	2	0	0	1	1	0	0	1	27	1	0	7.9	53.1	1	2	4	1.55	4.8	1.34	3.21	7.8	6.2	0	0	0	0	0	1	2
1608161543	4	56	0	1	1	0	1	2	4	0	0	0	1	1	0	1	0	1	0	9.5	38.2	1	3	12	0.81	4.6	1.47	3.2	10	5.1	0	0	0	0	0	1	2
1608221541	3	47	0	1	1	1	0	3	3	0	0	0	2	0	0	3	4	1	1	17.7	37.7	1	4	12	0.96	4.2	1.38	2.52	10.6	3.8	0	0	0	0	0	1	2
1608221542	4	51	1	1	1	0	1	3	3	1	1	0	3	1	0	2	0	0	0	14.5	67.7	1	1	4	2.85	4.2	1.03	3.04	11.1	6.6	1	0	1	0	1	1	2
1608221543	4	69	1	1	1	0	1	2	2	1	1	0	1	0	0	2	10	1	1	12.2	36.6	1	4	16	0.66	3.3	1.36	1.84	7.1	6.1	0	0	0	0	0	1	3
1608221544	4	66	1	1	1	0	0	4	4	1	1	0	2	0	1	1	24	1	0	5.1	68.8	1	1	4	1.89	4.8	1.6	3.78	6.6	5.77802	1	0	1	1	1	0	3
1608231541	4	57	0	1	1	1	0	4	5	0	0	1	1	0	0	1	7	1	1	9.8	47.8	1	2	8	1.16	4.6	1.1	3.37	9.4	5.6	0	0	0	1	1	1	2
1608231542	1	56	1	1	1	0	1	1	2	0	1	0	3	0	0	1	4	1	0	9.3	54.4	0	3	3	2.52	3.9	1.03	2.56	7.6	3.9	1	0	1	0	1	1	2
1608291531	4	59	1	0	1	0	1	1	4	0	0	0	2	0	0	3	24	1	1	19.7	70.9	1	2	8	1.31	2.9	0.77	1.95	9.9	5.5	0	0	1	0	1	1	2
1609021531	3	55	0	0	1	0	1	2	3	0	0	0	3	0	1	2	2	1	0	16.5	39	1	4	12	1.27	4	1.09	2.82	8.4	2.9	0	0	0	0	0	1	2
1609061531	4	64	0	1	1	0	1	2	3	0	0	1	3	0	1	1	3	1	1	8.7	45.6	1	3	12	3.85	4.4	1.28	2.24	7	4.3	1	0	0	0	1	1	3
1609071531	2	55	1	1	1	0	1	2	3	0	0	0	2	1	1	1	0	1	0	10.1	54.6	0	4	8	1.16	5.5	1.52	3.91	8.6	3.5	0	1	0	1	1	1	2
1609071532	4	67	0	1	1	0	1	2	3	0	0	1	2	0	1	2	22	0	1	15.3	61.4	1	3	12	11.28	5.5	1.42	1.77	9.8	8.1	1	1	0	0	1	1	3
1609081531	3	65	0	1	1	0	1	1	3	0	0	0	2	0	1	3	18	0	1	28.7	105.5	1	2	6	2.21502	4.75798	1.09624	2.64482	11.9	9.9	1	0	0	0	1	1	3
1609181531	4	55	0	1	1	1	1	1	2	0	0	0	2	0	1	1	6	1	1	5.5	57.9	1	3	12	2.19	3.8	1.2	2.37	5	6.3	1	0	0	0	1	0	2
1609181532	4	58	0	1	1	1	1	3	4	0	0	0	2	0	1	2	3	0	1	14	37.6	1	3	12	1.95	4	1.07	2.97	7	3	1	0	0	0	1	1	2
1609191531	4	66	1	1	1	1	0	3	4	0	0	0	2	0	0	1	7	1	1	8.2	67.9	1	3	12	0.58	2.6	1.14	1.69	7.1	5.7	0	0	0	0	0	1	3
1609191532	4	61	0	1	1	1	1	2	3	0	0	0	1	1	0	1	0	1	0	7.1	61.9	1	2	8	2.2	5.4	1.26	3.68	6	5.5	1	1	0	1	1	0	3
2701151551	1	49	0	1	1	1	1	3	2	0	0	0	1	0	1	2	8	1	1	12.8	33.6	1	5	5	4.75	4.82	1	2.1	10.65	3.4	1	0	1	0	1	1	2
2701151553	1	59	1	0	1	1	0	3	2	0	0	0	2	0	1	2	2	1	1	14	69.3	1	4	4	2.39	4.65	1	2.7	12.45	4.7	1	0	1	0	1	1	2
2701151562	1	38	1	1	1	1	0	3	1	1	1	1	3	1	1	3	1	1	0	17.06	67.6153	1	4	4	2.99	6.41	1.45	3.28	11	5.77802	1	1	0	0	1	1	1
2701161551	4	50	1	1	1	1	0	3	3	1	1	0	1	0	0	1	3	1	1	5.35	55.2	1	1	4	1.41	4.08	1.61	2.08	10.1	5.8	0	0	1	0	1	1	2
2701191552	1	54	1	0	1	1	0	3	2	0	0	0	2	0	1	1	16	1	1	5.02	60.7	1	4	4	0.91	3.83	1.3	2.26	6.32	5.3	0	0	0	0	0	0	2
2701191561	1	84	0	1	1	1	0	3	3	1	0	1	1	0	0	3	33	0	1	17.17	67.9	1	8	8	1.24	5.64	2.25	2.56	7.57	6.7	0	1	1	0	1	1	3
2703121551	4	60	0	1	1	0	1	1	2	0	0	1	3	0	1	1	9	1	1	7.33	47.9	1	8	32	5.51	6.15	1.26	2.33	9.26	3.5	1	1	0	0	1	1	3
2703121552	1	72	0	1	0	1	0	2	2	0	0	0	1	0	1	1	20	1	1	10.92	60	0	10	10	1.79	5.4	1.32	3.15	10.93	9.9	1	1	0	0	1	1	3
2703151551	1	52	0	1	1	1	1	1	1	0	0	0	1	0	0	3	4	1	1	23.86	36.9	1	4.84314	4.84314	1.94	4.4	1.07	2.6	12.97	3.9	1	0	0	0	1	1	2
2703151552	3	54	0	1	1	1	0	3	3	0	0	0	1	0	0	2	12	1	1	14.07	40.2	1	5	15	2	7.05	2.38	3.38	8.96	6.6	1	1	1	1	1	1	2
2703151553	2	29	1	1	0	1	0	4	5	0	0	0	3	1	1	2	0	0	0	14.08	56.3	0	10	20	6.6	5.81	1.06	1.79	13.1	4.8	1	1	0	0	1	1	1
2703151554	1	46	1	1	1	1	0	3	3	0	1	0	3	1	0	2	0	1	1	15.68	86.8	1	4	4	2.84	5.44	1.21	3.23	11.08	7.1	1	1	0	0	1	1	2
2703181551	4	46	1	1	1	1	0	4	5	1	1	0	3	0	1	1	9	1	1	10.01	73.9	1	7	28	1.7	4.7	1.28	2.71	7.33	6.5	1	0	0	0	1	1	2
2703181552	4	56	1	1	1	1	0	3	5	1	1	0	1	0	1	1	13	1	1	8.78	63.5	1	5	20	6.16	4.71	0.96	1.37	7.98	7.3	1	0	1	0	1	1	2
2703181553	1	61	0	0	1	1	1	1	1	0	0	1	1	0	1	1	10	0	1	4.5	506	0	12	12	1.54	6.18	1.37	3.7	5.28	9.9	0	1	0	1	1	0	3
2703201561	1	62	0	1	1	1	0	3	3	0	1	1	2	0	1	1	5	1	1	7.29	55.9	0	12	12	2.48	4.32	1.2	2.33	4.94	3.6	1	0	0	0	1	0	3
2704011551	4	48	1	1	1	1	0	3	2	0	0	0	3	0	1	2	5	1	0	13.31	57	1	4	16	1.82	4.52	1.23	2.56	11.16	5.3	1	0	0	0	1	1	2
2704021551	4	63	1	1	1	1	0	4	3	0	1	1	1	0	1	2	10	1	1	15.68	75.9	1	1	4	0.9	4.5	1.74	2.08	11.93	7.4	0	0	1	0	1	1	3
2704021552	1	62	0	1	1	1	0	2	3	0	0	0	2	0	1	1	7	1	1	8.6	101.9	0	6	6	2.19	4.83	1.23	2.63	9.38	6.1	1	0	0	0	1	1	3
2704021553	1	63	1	1	1	1	0	3	3	0	1	0	1	0	0	2	20	0	0	11.95	76	0	4	4	1.08	5.25	1.19	3.56	14.08	4.6	0	1	0	1	1	1	3
2704021554	1	83	1	1	1	1	0	1	2	0	0	1	3	0	1	1	7	0	1	9.2	129.8	0	7	7	2.8	2.44	0.84	0.93	10.71	9.99	1	0	1	0	1	1	3
2704031551	1	65	1	1	1	1	0	3	2	0	0	0	1	0	0	1	17	1	1	6.47	56.9	1	5	5	0.8	6.69	2.01	3.67	6.64	7	0	1	1	1	1	0	3
2704061551	4	64	1	1	1	1	0	3	2	0	0	1	2	0	1	1	15	0	1	10.27	133.6	1	10	40	3.58	7.3	1.36	4.16	4.94	8	1	1	0	1	1	0	3
2704071551	4	65	1	1	1	1	0	4	3	0	1	0	2	0	1	1	5	1	0	6.41	62.6	1	1	4	1.04	3.13	1.22	1.47	6.54	7.3	0	0	0	0	0	0	3
2704071557	1	59	1	1	1	1	1	3	2	0	0	0	1	0	0	2	20	1	1	15.4	80	1	5	5	1.84	3.4	1.3	1.5	7.97	5.7	1	0	0	0	1	1	2
2704081551	3	58	1	1	1	1	0	3	3	0	1	0	2	0	0	1	4	1	1	9.62	55.1	0	7	21	2.16	5.19	1.26	3.08	7.1	6	1	1	0	0	1	1	2
2704081557	1	62	1	1	1	1	0	3	4	1	1	0	1	0	0	2	7	1	1	12.68	61.5	0	2	2	1.06	6.72	1.71	4.28	11.26	5.4	0	1	1	1	1	1	3
2704091551	1	77	1	1	1	1	0	2	2	1	0	0	2	0	1	1	1	0	1	10.96	72	0	1	1	1.86	4.41	0.96	2.72	10.87	6.8	1	0	1	0	1	1	3
2704091552	2	44	1	1	1	1	1	2	3	1	0	0	3	1	0	1	0	1	1	11.01	66.9	1	3	6	4.14	5.61	1.28	2.64	9.08664	3.5	1	1	0	0	1	1	1
2704091553	2	54	1	1	1	1	0	3	3	0	0	0	3	0	1	1	3	1	1	5.34	75.1	1	4	8	1.73	5.31	1.24	3.35	5.11	3.8	1	1	0	0	1	0	2
2704091554	4	69	1	1	1	1	0	2	4	1	0	1	2	0	1	1	12	1	1	9.7	74.6	1	1	4	0.67	3.72	1.03	2.23	8.97	7.1	0	0	1	0	1	1	3
2704091555	4	48	0	1	1	1	1	3	2	0	0	1	2	0	0	1	4	1	1	6.51	55.5	1	4	16	2.07	4.61	1.27	2.59	5.77	4.3	1	0	0	0	1	0	2
2704101561	3	39	1	1	1	0	1	2	2	0	0	0	1	1	0	2	0	0	1	14.48	53.9	0	6	18	0.98	5.91	2.22	2.9	10.61	9.2	0	1	1	0	1	1	1
2704101562	4	61	1	1	1	1	0	3	3	0	1	0	2	0	0	1	10	1	0	8.9	63.4	0	8	32	2.56	5.6	1.27	3.27	9.08664	6.8	1	1	0	0	1	1	3
2704121561	3	71	0	1	1	0	1	2	2	0	0	1	2	0	1	1	12	1	1	9.07	66.7	1	10	30	1.53	5.25	1.55	2.87	7.44	6.1	0	1	1	0	1	1	3
2704201551	3	71	1	0	1	1	0	3	3	0	0	1	1	0	1	1	23	1	1	5.26	54.6	1	4	12	0.81	3.67	1.21	1.97	8.98	5.6	0	0	0	0	0	1	3
2704231551	4	66	1	1	1	1	0	4	4	1	0	0	2	0	0	1	21	1	0	8.29	111	1	3	12	2.21502	4.75798	1.09624	2.64482	6.81	5.8	1	0	0	0	1	0	3
2704231552	1	79	0	1	1	0	0	3	3	0	0	1	1	0	1	1	4	1	1	5.36	54.6	0	4	4	2.07	4.66	1.29	2.53	6.97	4.5	1	0	0	0	1	1	3
2704271551	4	52	0	1	1	0	1	2	2	0	0	0	2	1	1	2	0	0	1	13.78	57.9	1	3	12	3.48	3.95	1.06	1.93	10.41	6.4	1	0	0	0	1	1	2
2704271552	1	46	0	1	1	0	0	2	3	0	0	0	1	0	1	1	6	1	1	9.46	39.8	0	4	4	1.9	4.68	1.49	2.36	8.71	5.7	1	0	0	0	1	1	2
2704271553	1	57	1	1	1	1	0	3	3	0	0	0	3	0	1	2	17	1	1	12.14	106.1	1	3	3	3.13	5.09	1.26	2.61	11.85	6.5	1	0	0	0	1	1	2
2704281561	4	67	0	1	1	1	1	3	2	0	0	1	2	0	1	1	5	1	0	8.4	54.6	1	10	40	1.74	4.7	1.3	2.5	7.5	5	1	0	0	0	1	1	3
2704281565	4	58	1	1	1	1	0	3	3	0	1	0	3	0	1	2	17	1	1	12.14	106.1	1	8	32	3.13	5.09	1.26	2.61	11.85	6.5	1	0	0	0	1	1	2
2705051551	1	63	0	1	1	1	1	1	3	0	0	1	3	1	1	1	0	0	0	8.7	49	1	2	2	1.44	2.97	1.3	1.4	11.4	4.7	0	0	0	0	0	1	3
2705061551	4	71	0	1	0	1	0	2	4	0	0	1	1	0	0	1	18	1	1	9.13	42.7	1	10	40	1.67	5.59	1.26	3.53	14.72	6	0	1	0	1	1	1	3
2705061552	1	57	1	1	1	1	0	4	3	1	1	0	2	0	0	1	3	1	1	5.8	50.2	0	10	10	1.09	2.39	1	1.2	5.71	3	0	0	1	0	1	0	2
2705071551	4	47	1	1	1	1	0	3	3	0	0	1	1	0	1	1	2	1	1	7.34	75.8	1	2	8	1.18	4.07	1.3	2.15	8.83	5.3	0	0	0	0	0	1	2
2705071552	4	56	1	1	1	1	0	3	1	0	0	0	1	0	1	2	16	1	1	11.25	77.8	1	7	28	1.49	4.87	1.41	2.57	10.31	7.3	0	0	0	0	0	1	2
2705071553	4	58	1	1	1	1	0	3	3	0	0	0	2	0	1	1	4	1	1	10.51	50.5	1	6	24	0.99	4.1	1.1	2.36	13.44	6	0	0	0	0	0	1	2
2705071554	4	69	0	1	1	1	0	1	3	0	0	1	2	0	1	1	4	1	1	8.27	57.4	1	7	28	1.45	3.65	0.92	2.11	9.21	3.3	0	0	1	0	1	1	3
2705071555	1	72	0	1	1	1	1	2	2	0	0	0	2	0	1	1	15	1	1	0.1	5.6	0	3	3	0.81	4.51	1.46	2.53	15.94	0.93	0	0	0	0	0	1	3
2705081551	4	74	0	1	0	1	0	1	2	0	0	1	1	0	1	1	7	1	1	10.4	51.7	1	7	28	1.48	3.27	1.2	1.7	13.19	3.9	0	0	0	0	0	1	3
2705081552	4	73	0	1	0	1	0	1	2	0	0	1	1	0	1	1	19	1	1	5.8	53.7	1	7	28	1.71	4.42	1.2	2.5	7.9	5.4	1	0	0	0	1	1	3
2705081553	4	56	1	0	1	1	0	4	5	1	1	0	2	1	1	1	0	0	1	9.4	78	1	6	24	4.02	5.74	1.3	3.1	10.92	6	1	1	0	0	1	1	2
2705081554	4	77	1	1	1	1	0	1	4	1	1	1	3	0	1	1	20	1	1	6.8	75.1	1	5	20	1.18	2.81	1.1	1.4	8.55	4.6	0	0	0	0	0	1	3
2705091551	4	85	0	1	0	0	0	3	4	0	0	1	2	0	1	1	20	0	1	10.04	91.7	0	7	28	3.57	5.53	1.17	2.71	9.59	6.8	1	1	0	0	1	1	3
2705091561	4	66	1	1	1	1	1	2	2	0	0	1	1	0	1	1	5	1	1	5.7	67.6153	1	6	24	2.21502	4.75798	1.09624	2.64482	9.08664	5.77802	1	0	0	0	1	1	3
2705101551	4	56	1	1	1	1	0	4	5	0	1	0	3	0	1	1	10	1	1	8.55	58.7	1	5	20	2.24	3.15	1.09	1.22	11.4	4.6	1	0	0	0	1	1	2
2705101552	4	51	1	1	1	0	1	4	2	1	1	0	2	0	1	2	5	1	1	12.71	49.9	1	4	16	27.45	12.79	3.51	2	10.3	5.2	1	1	1	0	1	1	2
2705131551	4	73	0	1	0	1	0	2	3	0	0	1	3	0	1	1	5	1	1	8.68	41.4	1	2	8	1.73	4.72	1.34	2.72	7.55	4.8	1	0	0	0	1	1	3
2705141551	4	51	0	1	1	1	0	4	5	0	0	0	2	0	1	1	18	1	1	9.71	50.2	1	6	24	2.18	6.86	1.5	4.35	11.46	3.5	1	1	0	1	1	1	2
2705141552	4	65	1	1	1	1	0	3	4	0	0	1	2	0	1	2	14	1	1	15.58	79.2	1	5	20	3.31	4.8	1.34	2.25	11.73	6.9	1	0	0	0	1	1	3
2705141553	4	68	0	1	1	1	0	1	3	0	0	1	2	0	0	3	17	1	1	17.8	47.2	0	7	28	1.17	4.09	1.5	2.1	15.13	3.7	0	0	0	0	0	1	3
2705141554	2	49	0	1	1	1	0	4	3	1	0	1	2	0	1	2	1	1	1	14.53	57.8	1	7	14	3.67	5.3	1.02	2.75	12.57	6	1	1	1	0	1	1	2
2705141561	4	59	0	1	1	1	0	3	3	0	0	0	2	0	1	1	2	1	0	6.5	67.6153	1	8	32	2.21502	4.75798	1.09624	2.64482	9.08664	5.77802	1	0	0	0	1	1	2
2705181551	2	45	0	0	1	1	0	3	2	0	0	0	2	0	0	2	2	1	1	14.62	67.6153	1	8	16	6.47	4.24	1.1	1.2	11.34	5.77802	1	0	0	0	1	1	2
2705181552	2	60	1	1	1	1	0	3	2	1	1	1	3	0	1	1	5	1	1	7.18	46.2	1	5	10	2.14	5.61	1.05	3.27	6.44	5	1	1	0	0	1	0	3
2705201551	2	65	1	1	1	1	0	3	3	1	1	1	1	0	1	2	20	1	1	12.1	56.4	1	6	12	0.69	4.65	1.6	2.5	13.03	6.5	0	0	1	0	1	1	3
2705201552	2	53	0	1	1	1	0	4	3	0	0	1	1	0	1	1	9	1	0	5.9	49.7	1	5	10	2.24	4.23	1.5	2	5.79	4.6	1	0	0	0	1	0	2
2705201553	2	73	0	1	1	0	0	1	2	0	0	1	1	0	0	1	16	0	1	9.7	49.5	1	6	12	1.2	5.03	1.4	3.1	16.26	7.1	0	0	0	0	0	1	3
2705201554	2	43	0	1	1	1	0	2	2	0	0	1	1	0	0	3	2	1	1	18.47	24.3	1	5	10	27.54	9.73	1.73	1.7	13.37	4.9	1	1	1	0	1	1	1
2705201555	2	29	1	1	1	1	0	4	3	0	0	0	1	0	0	1	2	1	0	7.88	63.1	1	5	10	1.74	4.08	0.8	1.81	7.13	3.1	1	0	1	0	1	1	1
2705201556	2	68	0	1	1	1	0	1	3	0	0	1	1	0	1	1	16	1	1	7.3	66.5	1	5	10	1.35	2.48	1	1.1	9.08664	4.2	0	0	1	0	1	1	3
2705201557	4	73	0	1	1	1	0	1	3	0	0	0	3	0	1	1	20	1	1	7.7	56.6	1	3	12	2.44	4.6	1.4	2.3	10.48	5.9	1	0	0	0	1	1	3
2705221551	3	38	1	1	1	0	0	4	3	1	1	0	1	0	0	1	3	1	1	9.61	72	1	6	18	2.89	5.8	1.43	3.22	9.61	4.3	1	1	0	0	1	1	1
2705221552	2	69	1	1	0	0	1	2	3	0	0	1	2	1	0	2	0	1	1	13.35	57.8	1	6	12	1.73	4.71	0.93	2.93	13.6	5.1	1	0	1	0	1	1	3
2705221557	2	59	1	1	1	1	0	2	3	0	0	1	1	0	0	1	17	1	1	5.2	71	1	6	12	1.16	4.5	1.78	2.1	14.8	7.3	0	0	1	0	1	1	2
2705281551	3	64	0	1	1	1	0	1	2	0	0	1	2	0	0	1	0	0	1	8.2	67.6153	1	5	15	2.21502	4.75798	1.09624	2.64482	13.29	5.77802	1	0	0	0	1	1	3
2705281552	2	38	1	1	1	1	0	4	2	0	0	0	2	1	0	3	0	0	1	16.76	67.3	1	6	12	3.97	3.64	1	1.56	11.8	3.4	1	0	1	0	1	1	1
2705281553	2	64	0	1	1	1	0	1	2	0	0	1	3	0	1	1	11	1	1	4.91	63.6	1	5	10	0.93	3.04	1.36	1.2	5.92	3.8	0	0	0	0	0	0	3
2705281554	2	81	1	1	0	1	0	1	2	0	0	1	1	0	0	1	11	1	1	4.7	71.8	1	6	12	1.56	4.03	0.93	2.21	6.9	5.7	0	0	1	0	1	0	3
2706011551	4	67	0	1	1	1	0	1	4	0	0	1	1	0	1	1	4	1	1	9.2	37.1	1	3	12	0.51	4.89	1.8	2.7	14.54	5.1	0	0	1	0	1	1	3
2706011552	4	65	0	1	1	0	1	1	3	0	0	1	2	0	1	2	6	1	1	12.26	83.8	1	7	28	2.21502	4.75798	1.09624	2.64482	15.73	9.9	1	0	0	0	1	1	3
2706011553	3	33	1	1	1	1	0	3	5	0	1	0	2	0	0	2	4	1	1	16.1	44.4	1	7	21	1.07	5.12	1.21	3.43	15.96	3.7	0	0	0	1	1	1	1
2706021551	4	53	1	1	1	1	0	3	4	0	0	1	1	0	0	1	7	1	1	7.8	54.9	1	3	12	1.38	6.28	1.5	3.84	6.61	6.4	0	1	0	1	1	0	2
2706021561	3	66	1	1	1	1	0	3	3	1	1	1	2	0	1	1	9	1	1	7.57	67.3	1	8	24	1.27	2.89	1.14	1.34	7.68	5.2	0	0	0	0	0	1	3
2706021562	2	53	1	1	1	1	0	3	3	1	0	0	2	0	0	3	10	1	1	18.12	56.1	0	4	8	0.91	3.64	0.91	2.34	14.41	5.3	0	0	1	0	1	1	2
2706021563	4	67	0	1	1	1	0	3	3	0	0	0	1	0	0	1	10	1	1	8.29	48.4	1	3	12	2.97	4.92	1.41	2.38	8.41	4.8	1	0	0	0	1	1	3
2706021564	4	61	1	1	1	1	0	3	2	0	0	1	2	0	1	1	2	1	0	6.39	62.3	1	1	4	0.76	3.93	1.59	1.88	6.31	6.2	0	0	1	0	1	0	3
2706021565	4	58	0	1	1	1	0	4	3	0	0	0	2	1	1	1	0	1	0	5.38	50.9	1	4	16	1.45	0.97	1.57	3.25	5.5	4.6	0	0	1	0	1	0	2
2706021566	3	61	1	1	1	1	0	2	3	0	1	1	2	0	1	1	1	1	1	7.13	46.1	1	8	24	14.93	5	0.99	0.8	6.08	4.8	1	0	1	0	1	0	3
2706031551	2	50	1	1	1	1	0	3	2	0	0	0	3	0	1	1	2	1	1	8	99.5	1	5	10	2.21502	4.75798	1.09624	2.64482	8.49	6.8	1	0	0	0	1	1	2
2706031552	4	67	1	1	1	1	0	2	4	0	0	1	3	0	0	1	4	1	1	8.98	46	1	3	12	4.33	4.52	1.23	1.8	11.8	6.4	1	0	0	0	1	1	3
2706031553	4	39	1	1	1	1	0	4	5	0	0	0	2	0	0	1	4	1	1	10.32	58	1	4	16	5.52	4.85	1.33	1.48	8.25	5.3	1	0	0	0	1	1	1
2706041551	4	59	1	1	1	0	0	2	2	0	0	0	2	0	1	1	1	1	1	6.4	62.7	1	1	4	0.84	3.88	1.2	2.2	11.38	5.3	0	0	0	0	0	1	2
2706081551	4	64	0	1	1	1	0	3	5	0	0	0	1	0	1	1	7	1	0	5.75	38.1	1	2	8	1.49	3.27	1.16	1.61	6.4	3	0	0	0	0	0	0	3
2707121551	1	42	0	1	1	1	1	2	3	0	0	0	1	0	0	1	3	1	1	10.34	46.2	1	3	3	1.48	5.16	1.32	3.25	9.8	3.4	0	0	0	0	0	1	1
2707141551	4	66	0	1	1	1	0	3	4	0	0	0	2	0	1	1	10	1	1	9.17	53.1	1	1	4	0.8	5.62	1.65	3.29	8	7.9	0	1	1	0	1	1	3
2707141552	4	76	0	0	1	1	0	3	4	0	0	1	1	0	1	1	7	1	1	9.1	54.5	1	2	8	0.83	5.82	1.71	3.23	7.6	3.3	0	1	1	0	1	1	3
2707141553	4	63	0	1	1	1	0	3	3	0	0	1	1	0	1	1	28	1	1	5.5	87.3	0	3	12	2.21502	4.75798	1.09624	2.64482	9.08664	5.9	1	0	0	0	1	1	3
2707151551	2	69	0	1	1	1	1	3	2	0	0	0	1	0	1	1	15	1	1	8.31	56.3	1	3	6	1.04	3.41	1.09	1.8	8.2	5.2	0	0	0	0	0	1	3
2707161551	1	67	0	1	1	1	0	3	4	0	0	0	1	0	1	1	12	1	0	7.09	101.1	0	2	2	2.61	4.55	1.27	2.52	9.08664	7.3	1	0	0	0	1	1	3
2707181561	4	66	1	1	1	1	0	4	4	0	0	1	1	0	1	1	6	1	1	6.46	70.8	1	2	8	1.28	2.61	0.88	1.18	12.3	7.3	0	0	1	0	1	1	3
2707181562	1	82	0	0	1	0	1	1	3	0	0	1	2	0	1	2	30	1	1	13.24	38.9	1	4	4	0.65	3.48	1.07	1.9	10.1	9	0	0	0	0	0	1	3
2707221551	1	66	1	1	1	1	0	4	4	0	0	0	2	0	1	1	16	1	1	7.25	62	1	2	2	2.21502	4.75798	1.09624	2.64482	6.6	6.2	1	0	0	0	1	0	3
2707291561	2	65	1	1	1	1	0	3	3	0	1	1	2	0	1	1	6	1	1	7.49	70.8	1	7	14	1.95	3.51	1.19	1.73	7	4.1	1	0	0	0	1	1	3
2708041551	4	64	0	1	1	1	0	1	3	0	0	1	2	0	1	1	3	1	1	8.5	61.2	0	5	20	0.73	3.58	0.9	2.2	6.3	4.5	0	0	1	0	1	0	3
2708041552	4	57	0	0	1	1	0	4	4	0	0	1	1	0	1	2	18	1	1	15.89	49.8	1	1	4	3.8	5.24	1.37	2.52	11.1	6.8	1	1	0	0	1	1	2
2708051551	4	62	0	1	1	1	0	3	4	0	0	0	1	0	1	1	18	1	1	8.49	49.8	1	2	8	1.59	4.88	1.72	2.45	6.21	5.2	0	0	1	0	1	0	3
2708051552	4	66	0	1	1	1	1	1	2	0	0	0	2	0	1	1	4	1	1	7.08	57.4	1	4	16	0.77	4.41	1.22	2.59	9.4	5.3	0	0	0	0	0	1	3
2708051553	4	43	0	1	1	0	1	2	3	0	0	0	3	0	1	2	1	1	1	12.5	46.4	1	6	24	2.58	5.1	1.1	3.1	9.4	5.3	1	0	0	0	1	1	1
2708051561	3	59	1	0	1	1	0	4	3	1	1	1	2	0	1	2	15	1	1	13.8	72.1	1	5	15	0.76	3.76	1.2	2.2	9.8	9.5	0	0	0	0	0	1	2
2708061551	4	70	0	1	1	0	1	1	2	0	0	1	2	0	0	1	10	1	1	8.7	80.5	1	2	8	1.52	3.96	1.16	2.15	9.2	5.7	0	0	0	0	0	1	3
2708061552	4	49	0	1	1	1	0	4	5	0	1	0	2	0	1	1	25	1	1	9.48	35.3	1	2	8	14.96	6.02	1.15	0.75	10.96	3.8	1	1	0	0	1	1	2
2708061553	4	64	0	1	1	1	0	2	4	0	0	1	2	0	0	1	7	0	1	6.5	48.6	1	2	8	1.86	3.56	1.32	1.55	6.78	3.1	1	0	0	0	1	0	3
2708061561	3	48	1	1	1	1	1	3	2	0	0	0	1	0	1	2	2	1	1	14.2	55.2	1	5	15	1.16	4.28	1.4	2.5	13.8	6.6	0	0	0	0	0	1	2
2708071551	4	73	1	1	1	1	0	3	1	0	0	1	2	0	1	1	28	1	1	7.63	90	1	2	8	1.28	3.76	1.03	2.17	7.1	5.1	0	0	1	0	1	1	3
2708071552	3	54	1	1	1	1	0	3	5	1	1	0	1	0	0	1	8	1	1	7.9	48.8	1	2	6	1.49	5.13	2.07	2.09	11.36	2.9	0	0	1	0	1	1	2
2708091551	2	66	1	1	1	1	0	3	4	0	1	1	3	0	0	2	5	1	1	12.02	65	1	4	8	2.21502	4.75798	1.09624	2.64482	9.53	6.6	1	0	0	0	1	1	3
2708101551	4	55	1	1	1	0	0	3	5	1	1	0	2	0	1	1	10	1	1	8.71	52.1	1	6	24	8.21	5.47	1.09	0.9	8.9	4.8	1	1	0	0	1	1	2
2708121551	4	77	1	1	0	1	0	3	4	0	0	1	1	0	0	2	24	1	1	13.97	59.1	1	3	12	1.07	4.13	1.23	2.33	12.8	5.7	0	0	0	0	0	1	3
2708121552	4	33	1	1	1	1	0	4	4	0	0	0	3	1	1	1	0	0	1	10.01	52.6	1	3	12	1.92	4.82	1.1	2.87	12.4	4.5	1	0	0	0	1	1	1
2708131551	4	56	1	1	1	1	0	3	4	0	0	1	2	0	1	1	18	1	1	4	344.4	1	2	8	1.18	3.48	1.24	1.83	6	9.9	0	0	0	0	0	0	2
2708141551	4	44	1	1	1	1	0	4	5	1	1	0	1	0	1	1	20	0	1	7.12	69.3	1	1	4	0.76	2.9	1.16	1.24	7.8	4.9	0	0	0	0	0	1	1
2708141552	4	66	0	0	1	1	1	1	3	0	0	1	2	0	1	1	17	0	1	7.19	51	1	2	8	1.29	5.38	1.69	2.8	8.2	5.7	0	1	1	0	1	1	3
2708141553	3	45	0	1	1	1	0	4	5	0	0	0	3	1	1	2	0	0	1	14.48	42	1	8	24	1.74	5.56	1.35	3.51	11.6	4.9	1	1	0	1	1	1	2
2708141554	4	62	1	1	1	1	0	3	4	0	1	0	2	0	1	1	12	1	1	8.54	74.9	1	2	8	1.56	4.23	1.35	2.27	10.2	6.5	0	0	0	0	0	1	3
2708171551	4	67	0	1	1	1	0	1	2	0	0	1	3	0	1	2	25	1	1	14.34	86.5	1	4	16	2.84	4.71	1.43	2.29	10.2	9.7	1	0	0	0	1	1	3
2708171552	4	68	0	1	1	1	0	1	3	0	0	0	3	1	1	1	0	1	1	9.3	80	1	3	12	4.77	5.27	1.3	2.4	9	6.3	1	1	0	0	1	1	3
2708171553	3	76	1	1	1	1	0	3	4	0	0	1	3	0	1	2	23	1	1	14.27	86.9	1	8	24	2.24	4.22	1.37	2.15	12.4	6.4	1	0	0	0	1	1	3
2708171554	4	81	1	0	1	1	0	2	4	0	0	1	2	0	1	1	11	0	1	4.62	92.9	1	2	8	0.83	2.88	1.04	1.45	6.5	4.6	0	0	0	0	0	0	3
2708191551	4	56	1	1	1	1	1	1	3	0	0	0	1	0	1	1	17	1	1	6.8	50.9	1	2	8	0.48	4.08	1.4	2.4	9.08664	5.2	0	0	0	0	0	1	2
2708191552	4	78	1	1	1	1	0	4	5	0	0	1	2	0	1	1	31	1	1	7	89.6	1	3	12	1.17	3.98	1.1	2.5	12.2	6.1	0	0	0	0	0	1	3
2708191553	4	57	1	1	1	1	0	3	3	0	1	0	1	0	0	1	8	0	1	8.28	67.7	1	3	12	0.94	5.18	1.44	3.02	8.4	6.3	0	1	0	0	1	1	2
2708191554	4	55	1	1	1	0	1	3	2	1	0	0	2	0	0	1	8	1	1	10.1	59.4	1	2	8	1.53	4.64	1.3	2.9	11.4	7.8	0	0	0	0	0	1	2
2708191555	4	63	0	1	1	1	0	2	4	0	0	1	3	0	1	1	6	1	1	6.22	64.1	1	3	12	1.7	5.25	1.46	3.05	6.9	5.9	1	1	0	0	1	0	3
2708191556	4	54	1	1	1	1	0	3	4	1	0	0	3	0	1	1	3	1	1	6.32	59.4	1	2	8	1.59	3.82	1.37	1.9	7.5	6.9	0	0	0	0	0	1	2
2708191557	4	66	1	1	1	1	0	3	4	0	1	1	3	0	0	1	27	1	1	5.1	78.2	1	2	8	1.1	4.75	1.2	2.9	9.08664	6.2	0	0	0	0	0	1	3
2708221551	4	63	0	1	1	1	0	3	4	0	0	1	2	0	1	1	13	1	1	8.26	45.4	1	2	8	1.3	6.39	1.69	3.89	7.7	5.9	0	1	1	1	1	1	3
2708221552	2	29	0	1	1	1	0	3	4	0	0	1	2	0	0	2	2	0	1	15.67	32.1	1	6	12	3.77	4.92	1.41	2.25	11.1	4.2	1	0	0	0	1	1	1
2708221553	4	60	1	1	1	1	0	2	3	1	0	0	3	0	1	1	10	1	1	8.41	73.9	1	3	12	1.51	5.55	1.4	3.53	8.5	9.5	0	1	0	1	1	1	3
2708221554	4	56	1	0	1	1	0	3	5	0	0	0	2	1	0	2	0	0	1	12.4	68	1	3	12	1.66	3.67	1	2.1	13.5	5.7	0	0	1	0	1	1	2
3806201267	4	67	0	0	1	0	1	1	2	0	0	0	2	0	1	1	20	1	1	11	67.6153	1	3	12	2.21502	4.75798	1.09624	2.64482	7.2	5.77802	1	0	0	0	1	1	3
3807061321	2	60	0	0	1	1	0	3	3	0	0	0	2	0	1	1	16	1	1	10.6736	67.6153	1	5	10	2.21502	4.75798	1.09624	2.64482	9.08664	5.77802	1	0	0	0	1	1	3
3808061261	4	58	0	0	1	0	1	2	2	0	0	0	3	0	0	2	0	1	0	12.75	54.6	1	3	12	12.95	7.51	0.99	2.5	10.5	4.77	1	1	1	0	1	1	2
3808061262	4	68	1	1	1	1	0	3	4	1	0	0	2	0	1	2	8	1	1	12	67.6153	1	4	16	2.21502	4.75798	1.09624	2.64482	7.3	5.77802	1	0	0	0	1	1	3
3808061263	1	47	1	0	1	1	0	4	5	1	0	0	1	0	0	1	5	1	0	10.65	79.8	0	6	6	2.98	4.01	0.49	2.72	9.08664	9.93	1	0	1	0	1	1	2
3808061264	4	65	0	1	1	1	0	3	3	0	1	1	1	0	1	1	3	1	0	6.9	67	1	3	12	2.54	5.69	1.53	3.79	9.08664	6.78	1	1	0	1	1	1	3
3808061265	1	45	1	0	1	1	0	3	5	1	0	0	3	0	1	2	9	1	1	12.81	68.1	0	8	8	2.21502	4.75798	1.09624	2.64482	9.1	9.77	1	0	0	0	1	1	2
3808061266	4	74	1	0	1	0	1	1	3	0	0	0	1	0	1	3	6	1	0	30.54	62.7	1	2	8	2.21502	4.75798	1.09624	2.64482	12.1	7.27	1	0	0	0	1	1	3
3808061267	4	63	0	0	1	1	0	1	4	0	0	1	2	0	1	1	15	1	0	7.87	56.2	1	4	16	2.21502	4.75798	1.09624	2.64482	9.08664	4.56	1	0	0	0	1	1	3
3808061268	1	66	0	0	1	1	0	1	3	0	0	0	2	0	1	3	3	1	0	18.75	53.2	0	8	8	1.04	4.39	1.07	3.38	13.3	9.55	0	0	0	1	1	1	3
3808061269	3	55	1	0	1	0	0	2	5	0	0	0	3	0	1	1	3	1	1	8.91	67.6153	1	2	6	1.31	5.2	1.29	3.94	8.2	5.77802	0	1	0	1	1	1	2
3808061281	4	56	1	0	1	0	1	3	3	1	0	0	2	0	0	3	3	1	1	17.05	76.5	1	0	0	2.21502	4.75798	1.09624	2.64482	9.08664	9.36	1	0	0	0	1	1	2
3808061282	1	55	1	0	1	0	1	3	1	0	0	1	2	0	0	2	4	1	0	14.62	67.6153	1	5	5	2.92	4.25	0.86	2.92	11.6	5.77802	1	0	1	0	1	1	2
3808061283	4	70	1	0	1	0	1	3	3	0	0	1	2	1	0	2	0	1	0	13.55	79.9	1	4	16	4.18	4.57	0.8	2.89	9.08664	5.37	1	0	1	0	1	1	3
3808061284	4	66	0	0	0	0	1	1	1	0	0	1	2	0	1	3	15	1	1	21	67.6153	1	6	24	2.4	5.25	1.08	4.11	9.08664	5.77802	1	1	0	1	1	1	3
3808061285	4	71	0	0	1	0	0	3	4	0	0	1	2	0	1	1	21	1	0	10.35	130	1	3	12	3.29	5.63	1.08	4.04	10.2	9.9	1	1	0	1	1	1	3
3808071261	4	60	1	0	1	1	0	3	4	0	0	0	2	0	0	2	4	1	0	14.04	67	1	2	8	1.03	3.17	0.65	2.3	10.4	4.68	0	0	1	0	1	1	3
3808071262	4	53	0	0	1	0	0	1	1	0	0	1	3	0	1	2	20	1	1	15.21	68.4	1	4	16	1.36	5.05	1.38	3.65	9.08664	7.47	0	0	0	1	1	1	2
3808071263	4	49	0	0	0	0	0	3	2	0	0	1	1	0	0	3	0	1	0	18.11	53.3	1	1	4	0.93	3.86	1.1	2.53	11.6	6.1	0	0	0	0	0	1	2
3808081321	1	57	0	1	1	1	0	4	5	0	0	0	2	0	1	1	10	1	1	10.6736	67.6153	0	5	5	2.21502	4.75798	1.09624	2.64482	9.08664	5.77802	1	0	0	0	1	1	2
3808131261	3	61	0	0	1	0	0	1	2	0	0	1	2	0	1	2	13	1	0	15.7	128.3	1	6	18	3.63	2.74	0.8	1.24	9.6	9.8	1	0	1	0	1	1	3
3808131262	1	78	0	0	1	1	0	1	3	0	0	0	2	0	1	3	22	0	1	27.57	170	0	12	12	2.35	4.47	0.7	3.21	9.9	9.9	1	0	1	0	1	1	3
3808131263	4	71	0	0	1	1	0	2	2	0	0	0	1	0	0	3	10	1	1	22.28	99.9	1	6	24	3.55	3.94	0.73	2.49	9.08664	6.09	1	0	1	0	1	1	3
3808131264	4	60	0	0	1	1	0	3	4	0	0	0	1	0	0	3	13	1	1	20.79	68.6	1	8	32	1.75	6.2	1.78	4.33	12.4	6.73	1	1	1	1	1	1	3
3808131266	4	46	0	0	1	0	1	2	4	0	0	1	2	0	0	3	10	1	1	23.41	51.7	1	3	12	0.98	3.41	1.08	2.05	10.7	4.46	0	0	0	0	0	1	2
3808131267	4	67	1	0	1	0	1	3	1	0	0	0	2	1	1	1	0	0	0	10.85	60	1	3	12	1.82	3.88	0.9	2.67	9.08664	4.65	1	0	1	0	1	1	3
3808131268	4	50	0	0	1	1	0	3	4	0	0	1	2	1	0	3	0	0	0	18.29	44.5	1	6	24	0.7	3.06	1.48	1.35	9.08664	4.64	0	0	0	0	0	1	2
3808131281	1	65	1	0	1	0	1	3	2	1	0	0	2	0	1	1	8	1	1	10.6736	67.6153	1	7	7	3.51	3	0.52	1.48	9.08664	5.77802	1	0	1	0	1	1	3
3808131282	1	40	1	0	1	0	1	3	1	1	0	0	3	1	1	1	0	1	0	6.9	67.6153	0	5	5	2.21502	4.75798	1.09624	2.64482	12	5.77802	1	0	0	0	1	1	1
3808131283	1	56	1	0	0	1	0	4	4	1	0	0	1	0	0	2	1	1	1	11.84	65.2	1	7	7	2.81	3.87	0.67	2.62	9.5	4.73	1	0	1	0	1	1	2
3808131284	1	67	0	1	1	0	1	1	2	0	0	1	1	0	1	3	25	1	1	16.62	82	0	2	2	3.05	6.04	0.9	4.63	11.4	7.87	1	1	1	1	1	1	3
3808131285	1	79	0	0	1	1	1	1	1	0	0	0	3	0	1	1	0	0	0	10.6736	67.6153	0	2	2	1.3	5.62	1.11	4.66	5.6	5.77802	0	1	0	1	1	0	3
3808131286	2	68	0	0	1	0	1	1	2	0	0	1	2	0	1	1	29	1	0	8.58	70.3	1	3	6	1.15	3.17	0.89	1.91	9.08664	6.48	0	0	1	0	1	1	3
3808131287	1	73	0	0	1	1	1	1	2	0	0	0	1	0	1	1	0	1	1	10.6736	67.6153	0	2	2	1.18	3.62	0.65	2.64	9.7	5.77802	0	0	1	0	1	1	3
3808131288	1	67	0	0	1	1	1	1	2	0	0	0	2	0	1	1	10	1	0	10.6736	67.6153	0	2	2	2.21502	4.75798	1.09624	2.64482	5.6	5.77802	1	0	0	0	1	0	3
3808141263	4	68	0	1	1	1	0	3	4	0	0	1	3	0	1	3	11	1	1	17.3	67.6153	1	4	16	2.21502	4.75798	1.09624	2.64482	10.4	5.77802	1	0	0	0	1	1	3
3808181267	4	48	0	0	1	1	0	3	2	0	0	0	3	0	0	3	14	1	1	18.85	55.6	1	3	12	1.24	3.25	1.16	2.02	10.7	3.75	0	0	0	0	0	1	2
3808201261	1	60	0	0	1	0	1	1	2	0	0	0	1	0	1	2	6	1	0	16.22	46.4	1	3	3	1.28	4.47	1.7	2.66	10.3	7.11	0	0	1	0	1	1	3
3808201262	4	66	0	1	1	1	1	1	1	0	0	1	1	0	1	1	20	1	1	10.23	43.8	1	4	16	2.49	3.43	0.91	1.87	9.2	3.69	1	0	1	0	1	1	3
3808201263	1	54	0	0	0	1	0	3	4	0	0	0	2	0	1	1	16	1	1	7.07	45.3	1	3	3	1.35	4.23	0.89	3.13	7.5	5.66	0	0	1	0	1	1	2
3808201264	4	57	0	1	1	1	0	3	2	0	0	1	1	0	1	1	27	1	1	9.45	82.6	1	4	16	2.21502	4.75798	1.09624	2.64482	10.6	4.93	1	0	0	0	1	1	2
3808201265	4	66	0	1	1	0	1	1	1	0	0	1	2	0	1	2	14	1	1	12.61	58	1	3	12	0.94	2.91	0.76	1.86	9.9	5.75	0	0	1	0	1	1	3
3808201266	1	45	0	0	1	0	1	1	2	0	0	0	1	0	0	1	6	0	0	5.55	66.8	1	2	2	0.98	3.24	0.65	2.35	9.9	3.24	0	0	1	0	1	1	2
3808201268	4	64	0	0	1	0	1	1	2	0	0	1	2	0	1	1	13	1	1	10.6736	67.6153	1	8	32	2.21502	4.75798	1.09624	2.64482	9.08664	5.77802	1	0	0	0	1	1	3
3808201269	3	47	1	0	1	1	0	3	4	1	0	0	2	1	0	1	0	0	0	10.6736	67.6153	1	3	9	2.21502	4.75798	1.09624	2.64482	11.9	5.77802	1	0	0	0	1	1	2
3808201281	2	40	1	0	1	0	0	3	5	1	1	0	3	1	1	2	0	1	0	12.7	67.6153	1	5	10	2.21502	4.75798	1.09624	2.64482	10.7	5.77802	1	0	0	0	1	1	1
3808201282	3	58	1	0	1	0	0	3	3	1	0	1	2	1	0	1	0	1	0	5.7	67.6153	1	1	3	2.21502	4.75798	1.09624	2.64482	13.3	5.77802	1	0	0	0	1	1	2
3808201283	4	65	1	0	1	1	0	4	2	0	0	0	2	0	0	2	7	1	0	15.7	69.1	1	2	8	1.37	4.94	1.11	3.96	9.5	5.5	0	0	0	1	1	1	3
3808201284	4	74	1	0	1	0	1	2	1	0	0	0	1	0	0	3	20	1	0	25.84	59.8	0	5	20	2.21502	4.75798	1.09624	2.64482	12	3.41	1	0	0	0	1	1	3
3808201285	1	44	1	0	1	0	1	2	2	1	0	0	3	1	1	2	0	1	0	12.09	74.5	1	3	3	2.84	5.78	1.07	4.58	9.4	3.98	1	1	0	1	1	1	1
3808201286	3	66	1	0	1	0	1	3	1	0	0	0	1	0	1	3	3	1	0	21.23	68.2	1	4	12	1.23	2.98	0.93	1.53	10.4	5.57	0	0	1	0	1	1	3
3808201287	3	43	1	0	1	1	0	2	2	1	0	0	1	1	0	2	0	1	0	13.93	67.6153	1	2	6	4.6	2.99	0.67	1.57	9.3	5.77802	1	0	1	0	1	1	1
3808201288	1	76	1	0	1	0	0	2	2	0	0	0	1	1	0	3	0	0	0	27.57	67.6153	1	5	5	1.73	3.37	0.88	2.09	13	5.77802	1	0	1	0	1	1	3
3808201289	3	33	1	1	1	1	0	4	4	1	1	0	2	1	0	1	0	0	0	9.04	67.6153	0	1	3	2.21502	4.75798	1.09624	2.64482	7.4	5.77802	1	0	0	0	1	1	1
3809021261	1	67	0	1	1	1	0	1	2	0	0	1	3	0	1	1	20	0	1	10.6736	67.6153	0	8	8	2.21502	4.75798	1.09624	2.64482	5.5	5.77802	1	0	0	0	1	0	3
3809021262	4	54	0	0	1	1	0	2	3	0	0	0	1	0	0	1	16	1	1	10.6	50.3	1	4	16	0.9	4.57	1.23	3.33	11.2	7.49	0	0	0	0	0	1	2
3809021263	1	27	0	1	0	1	0	4	4	0	1	0	1	1	0	1	0	0	0	8.6	67.6153	0	12	12	1.46	4.06	1.02	2.99	7.7	5.77802	0	0	1	0	1	1	1
3809021264	4	70	0	0	1	1	0	1	1	0	0	1	3	0	1	1	18	1	1	7.24	61.8	1	6	24	2.21502	4.17	1.09624	2.64482	7	2.7	1	0	0	0	1	1	3
3809021265	4	51	0	0	1	0	0	2	4	0	0	0	3	1	0	3	0	0	0	19.53	56.1	1	1	4	2.31	4.28	1.18	2.96	9.4	4.75	1	0	0	0	1	1	2
3809021266	4	48	0	0	1	0	1	1	3	0	0	0	3	0	1	1	5	0	1	4.9	131.4	1	42	168	1.46	5.69	1.32	4.5	4.7	5.29	0	1	0	1	1	0	2
3809021267	4	70	0	0	1	0	1	1	4	0	0	0	2	0	1	2	20	1	1	11.95	85.5	1	6	24	0.9	3.43	1.33	2	9.08664	8.13	0	0	0	0	0	1	3
3809021268	4	57	0	0	1	0	0	3	4	0	0	0	2	0	1	3	10	1	0	19.9	50	1	6	24	2.73	4.55	1	3.22	12.5	3.52	1	0	1	0	1	1	2
3809021269	4	81	0	1	1	1	0	3	4	0	0	0	2	0	1	1	4	1	1	5.82	59	1	4	16	1.65	3.14	0.91	1.89	8.4	5.2	0	0	1	0	1	1	3
3809021281	2	26	1	0	0	0	0	4	4	1	1	1	1	1	1	2	0	1	0	14.09	58	1	4	8	2.21502	4.75798	1.09624	2.64482	10.8	5.43	1	0	0	0	1	1	1
3809021282	1	57	1	0	1	1	0	3	3	0	0	0	1	0	0	1	15	0	1	9.05	72.1	1	4	4	1.98	3.9	0.65	2.82	6.9	8.1	1	0	1	0	1	0	2
3809021283	4	73	1	1	1	0	0	3	4	0	1	1	3	0	1	2	23	1	0	12.17	59.6	1	6	24	1.29	3.2	0.85	2.05	11.5	3.85	0	0	1	0	1	1	3
3809021284	3	29	1	0	1	0	0	4	3	0	0	0	3	1	1	3	0	1	0	20.19	64.3	0	8	24	5.37	4.75798	1.09624	2.64482	12.8	4.52	1	0	0	0	1	1	1
3809021286	4	56	1	0	1	1	1	2	1	0	0	0	2	0	1	2	13	0	0	14.09	58	1	6	24	1.21	4.84	1.28	3.51	11.2	5.43	0	0	0	1	1	1	2
3809021287	1	74	1	1	1	1	0	4	3	0	0	0	1	0	1	1	15	1	1	6.74	106.1	0	5	5	2.21502	4.75798	1.09624	2.64482	5.8	9.15	1	0	0	0	1	0	3
3809021288	1	43	1	1	1	0	1	2	4	1	0	1	2	0	0	1	2	1	0	10.5	67.6153	1	4	4	2.21502	4.75798	1.09624	2.64482	9.08664	5.77802	1	0	0	0	1	1	1
3809021289	1	77	1	0	1	0	0	2	3	0	0	0	1	1	1	2	0	0	1	11.39	94.1	1	8	8	1.3	4.36	0.83	3.6	8.8	6.03	0	0	1	1	1	1	3
3809031261	4	51	0	0	1	0	1	1	3	0	0	0	1	1	0	2	0	1	0	12.3	67.6153	1	2	8	1.28	3.78	0.93	2.71	12.1	5.77802	0	0	1	0	1	1	2
3809031262	4	80	0	1	1	1	1	2	3	0	0	0	1	0	1	2	17	1	0	14.44	50.7	1	5	20	1.28	5.66	1.02	4.51	9.7	5.99	0	1	1	1	1	1	3
3809031288	1	42	1	0	1	0	0	3	5	0	1	0	3	0	0	2	5	1	0	12.9	67.6153	1	3	3	2.21502	4.75798	1.09624	2.64482	10.6	5.77802	1	0	0	0	1	1	1
3809201261	4	68	0	0	1	1	0	1	4	0	0	0	2	0	1	1	15	1	1	10.93	53.4	1	4	16	0.67	4.24	1.56	2.59	8.9	4.8	0	0	1	0	1	1	3
3809201262	4	47	0	0	1	1	0	1	2	0	0	0	3	1	0	2	0	0	0	15.1	67.6153	1	3	12	2.17	5.13	1.42	3.64	10.8	5.77802	1	0	0	1	1	1	2
3809201263	1	69	0	0	1	0	0	1	1	0	0	0	2	0	1	3	9	1	1	27.87	100.3	1	6	6	2.21502	4.75798	1.09624	2.64482	11.5	8.05	1	0	0	0	1	1	3
3809201264	4	85	0	0	1	1	0	1	2	0	0	0	1	0	1	2	30	1	1	15	84.9	1	5	20	1.33	2.98	0.93	1.69	9.8	9.04	0	0	1	0	1	1	3
3809201265	1	54	0	0	1	0	1	2	1	0	0	0	2	1	1	3	0	1	0	20.4	67.6153	0	6	6	2.21502	4.75798	1.09624	2.64482	9.6	5.77802	1	0	0	0	1	1	2
3809201266	4	74	0	0	1	1	0	1	2	0	0	0	3	0	1	2	10	1	1	15.66	64.3	1	5	20	3.34	5.18	1.11	3.54	12.6	9.9	1	1	0	1	1	1	3
3809201267	4	70	1	1	1	1	0	4	5	0	0	0	2	0	1	1	20	1	1	9.79	106.8	1	3	12	1.91	3.28	0.51	2.3	12.3	8.46	1	0	1	0	1	1	3
3809201281	1	55	1	1	1	1	0	4	5	1	1	0	3	0	1	2	22	1	0	11.99	86.4	1	4	4	1.34	3.24	0.73	2.1	8.4	6.47	0	0	1	0	1	1	2
3809201282	1	56	1	1	1	1	0	4	4	0	0	0	2	1	1	1	0	0	0	11.1	67.6153	1	1	1	2.21502	4.75798	1.09624	2.64482	10.5	5.77802	1	0	0	0	1	1	2
3809201283	2	55	1	0	1	0	0	3	4	1	0	0	1	0	0	2	17	1	1	13.57	40.2	1	6	12	2.84	4.75	1.03	3.19	8.1	5.76	1	0	1	0	1	1	2
3809201284	1	45	1	1	1	1	1	4	3	1	0	0	2	1	0	1	0	1	0	8.1	67.6153	0	1	1	2.5	4.15	0.77	2.77	7.6	5.77802	1	0	1	0	1	1	2
3809201285	1	60	1	1	1	0	1	2	3	0	0	0	3	0	0	1	12	1	0	6	67.6153	0	1	1	2.21502	4.75798	1.09624	2.64482	10.8	5.77802	1	0	0	0	1	1	3
3809201286	1	72	1	0	1	1	1	1	3	0	0	0	1	0	1	2	1	1	1	16.51	67.5	1	2	2	1.33	4.2	1.2	2.82	10	10.06	0	0	0	0	0	1	3
3810181261	3	60	0	0	1	0	0	2	4	0	0	1	2	0	1	3	12	1	1	18.85	55.6	0	6	18	1.24	3.25	1.16	2.02	10.9	3.75	0	0	0	0	0	1	3
3810181262	4	68	0	0	1	0	1	1	1	0	0	0	3	0	1	1	7	1	1	7.19	82.1	1	4	16	2.33	5.14	1.41	3.7	8.3	5.13	1	0	0	1	1	1	3
3810181263	3	59	0	0	1	0	1	2	1	0	0	0	1	0	1	3	9	1	1	20.14	67.6153	1	4	12	2.21502	4.75798	1.09624	2.64482	12.4	5.77802	1	0	0	0	1	1	2
3810181264	4	70	0	0	1	1	0	2	4	0	0	1	1	0	1	1	18	1	0	5.97	86.7	1	6	24	1.88	6.89	2.08	7.71	9.3	3.56	1	1	1	1	1	1	3
3810181265	4	67	0	0	1	0	1	1	1	0	0	0	3	1	1	2	0	1	0	11.25	58.9	1	4	16	1.63	3.17	0.63	2.25	14.8	3.86	0	0	1	0	1	1	3
3810181266	3	77	0	0	1	1	1	1	2	0	0	0	3	0	1	2	24	1	1	15.72	117.3	1	6	18	1.92	3.65	0.83	2.59	9.2	11.18	1	0	1	0	1	1	3
3810181281	3	43	1	1	1	0	0	3	5	0	0	0	2	0	0	1	1	1	0	9.3	81.9	1	2	6	1.47	4.68	1.1	3.53	9.08664	3.84	0	0	0	1	1	1	1
3810181282	1	27	1	1	1	1	0	4	5	0	0	0	3	1	1	2	0	0	0	12.9	53.7	1	2	2	3.82	5.22	1.09624	2.64482	10.9	5.77802	1	1	0	0	1	1	1
3810181283	1	63	1	0	1	0	1	3	3	0	0	1	3	0	1	2	14	1	1	16.36	51.7	1	1	1	1.68	3.04	0.85	1.83	8.9	4.28	0	0	1	0	1	1	3
3810181284	4	66	0	1	1	0	1	2	2	0	0	1	2	1	1	2	0	1	0	12.71	49.9	1	1	4	5.02	5.94	1.12	3.91	10.5	5.93	1	1	0	1	1	1	3
3810181285	1	51	1	1	1	0	1	1	5	1	0	0	2	0	1	2	2	1	1	11.9	52.9	1	3	3	2.21502	4.75798	1.09624	2.64482	10.9	5.77802	1	0	0	0	1	1	2
3810181286	1	79	1	0	1	0	1	2	1	0	0	1	2	1	1	2	0	0	0	12.3	67.6153	1	4	4	6.1	5.41	0.87	2.73	13.3	5.77802	1	1	1	0	1	1	3
3810181287	4	62	0	1	1	1	0	3	4	0	0	1	1	0	0	1	15	1	0	10.07	41.8	0	1	4	0.83	5.18	1.62	3.6	7	3.83	0	1	1	1	1	1	3
3810181288	1	77	0	1	1	1	0	1	3	0	0	1	1	0	0	2	9	1	1	11.86	45	0	1	1	1.32	5.67	0.99	4.45	10.6	7.39	0	1	1	1	1	1	3
3810251261	4	68	0	0	1	0	0	1	2	0	0	1	2	0	1	3	3	1	0	16.61	56.3	1	3	12	11.83	7.76	1.16	1.5	9.6	4.86	1	1	0	0	1	1	3
3810251262	4	54	0	0	1	1	1	1	1	0	0	0	3	1	1	1	0	1	0	9.8	54.8	1	2	8	8.05	6.79	1.24	3.37	8.9	3.26	1	1	0	1	1	1	2
3810251263	4	70	0	1	1	1	0	2	3	0	0	1	1	0	0	2	0	0	0	13.7	67.6153	1	3	12	1.66	4.94	1.16	3.54	9.4	5.77802	0	0	0	1	1	1	3
3810251264	3	59	1	0	1	1	0	3	5	0	0	0	3	0	1	2	16	1	1	13.42	101.3	1	2	6	0.88	2.91	1.02	1.56	10	8.28	0	0	1	0	1	1	2
3810251265	4	60	1	1	1	1	0	3	4	0	0	0	2	0	1	2	26	1	1	14.64	73.1	1	2	8	1	2.66	0.94	1.55	10.9	4.93	0	0	1	0	1	1	3
3810251266	4	62	1	0	1	0	1	3	3	0	0	0	1	0	0	3	15	1	1	17.67	45.7	1	2	8	0.62	3.71	1.56	1.76	12.5	4.98	0	0	1	0	1	1	3
3810251267	4	70	1	0	1	1	0	3	3	0	0	0	2	0	1	3	20	1	1	19.72	58.6	1	3	12	2.76	5.41	1.1	3.66	11.1	4.36	1	1	0	1	1	1	3
3810251281	2	53	0	0	1	0	1	2	4	0	0	1	3	0	0	2	7	1	0	15.56	58.4	1	4	8	2.73	4.71	0.84	3.41	8.3	5.58	1	0	1	1	1	1	2
3810251282	1	74	1	1	1	1	0	2	3	0	0	0	2	0	1	2	50	1	1	12.84	69.8	1	3	3	1.21	2.54	0.83	1.3	8.7	5.14	0	0	1	0	1	1	3
3810251283	1	70	0	0	1	1	1	1	3	0	0	0	2	0	1	3	0	1	0	18.6	67.6153	0	1	1	2.21502	4.75798	1.09624	2.64482	11.7	5.77802	1	0	0	0	1	1	3
3810251284	2	56	1	0	1	1	0	3	3	0	0	0	2	0	0	3	20	1	1	18.45	102.4	1	3	6	3.05	5.49	1.31	3.61	8.8	10.65	1	1	0	1	1	1	2
3810251285	1	57	1	0	1	1	0	4	5	1	1	0	1	0	0	2	12	1	1	16.42	67.6153	1	1	1	1.86	4.54	0.83	3.3	10.3	5.77802	1	0	1	0	1	1	2
3810251286	1	67	0	0	1	0	1	2	3	0	0	1	2	0	1	3	28	1	1	23.3	91.1	0	1	1	6.88	6.98	1.41	3.89	14.2	11.5	1	1	0	1	1	1	3
3810251287	2	65	1	1	1	1	0	3	5	0	0	0	2	0	1	3	20	1	1	20.2	89.7	1	4	8	1.89	3.77	0.89	2.35	9.5	8.61	1	0	1	0	1	1	3
3811041311	1	61	1	1	1	1	0	4	5	1	0	0	2	0	1	1	14	1	1	10.6736	67.6153	1	1	1	2.21502	4.75798	1.09624	2.64482	9.08664	5.77802	1	0	0	0	1	1	3
3811081261	4	64	0	0	1	0	1	1	3	0	0	0	1	0	0	1	9	1	0	9.16	48.6	1	4	16	2.01	3.45	0.8	2.16	8.4	3.29	1	0	1	0	1	1	3
3811081262	4	41	0	0	1	0	1	2	3	0	0	0	1	0	0	2	5	1	1	13	67.6153	1	4	16	2.05	3.98	0.92	2.76	10.3	5.77802	1	0	1	0	1	1	1
3811081263	4	40	0	1	1	0	0	3	4	0	0	0	1	0	0	3	6	1	0	17.57	34.5	1	2	8	1.15	4.96	1.75	3.13	12.3	8.85	0	0	1	0	1	1	1
3811081264	4	48	0	1	1	0	1	2	3	0	0	1	1	0	0	2	2	1	1	14.09	42.8	1	2	8	2.31	5.62	2.13	3.06	11	6.15	1	1	1	0	1	1	2
3811081265	4	63	0	0	1	1	0	4	4	0	0	0	2	0	1	2	14	1	1	14.19	48.7	1	3	12	0.81	2.98	0.95	1.76	10.9	4.52	0	0	1	0	1	1	3
3811081266	1	44	0	0	1	0	1	1	3	0	0	0	3	0	1	2	8	1	0	15.1	48.5	0	6	6	1.73	5.03	1.26	3.78	11.5	5.41	1	0	0	1	1	1	1
3811081267	4	67	1	1	1	1	0	2	4	1	1	0	2	1	0	1	0	1	1	9.7	67.6153	1	3	12	2.89	5.18	1.06	3.84	8.8	5.77802	1	1	0	1	1	1	3
3811081281	1	57	1	1	1	0	0	4	4	0	1	0	3	1	0	1	0	1	0	5.67	81.3	1	1	1	2.21502	4.75798	1.09624	2.64482	6.2	5.64	1	0	0	0	1	0	2
3811081282	1	67	1	0	1	1	0	1	2	0	0	1	2	1	0	1	0	1	0	6.42	58.9	1	2	2	1.18	4.27	0.84	3.25	13.1	1.72	0	0	1	0	1	1	3
3811081283	1	67	0	0	1	1	0	3	4	0	0	1	1	0	1	1	12	1	0	8.5	67.6153	0	1	1	2.21502	4.75798	1.09624	2.64482	15.1	5.77802	1	0	0	0	1	1	3
3811081284	1	70	0	0	1	0	0	1	1	0	0	1	1	0	1	3	20	1	1	24.48	37.5	0	2	2	1.26	2.85	0.91	1.5	14.5	3.05	0	0	1	0	1	1	3
3811081285	1	58	0	0	1	0	0	1	1	0	0	1	3	0	0	3	10	1	1	18.29	56.6	1	2	2	3.41	5.91	1.4	3.97	11.1	5.78	1	1	0	1	1	1	2
3811081286	1	76	0	0	1	0	0	1	3	0	0	1	2	0	1	3	12	1	0	21.84	60.1	0	2	2	1.44	4.06	0.76	3.01	11.4	6.23	0	0	1	0	1	1	3
3811081287	4	52	1	1	1	1	0	3	3	1	0	1	2	0	1	3	2	1	0	20.78	66.6	0	2	8	0.97	3.93	0.95	2.71	8.7	6.07	0	0	1	0	1	1	2
3811081288	1	50	1	0	1	1	0	4	5	1	1	0	2	0	1	1	1	1	0	9.11	76.1	1	2	2	2.54	5.81	1.02	4.58	9	4.59	1	1	1	1	1	1	2
3811081289	1	57	0	0	1	1	0	2	2	0	0	1	1	0	1	2	19	1	1	16.15	58.2	1	1	1	2.63	4.81	1.07	3.52	11.8	6.21	1	0	0	1	1	1	2
3811121321	1	55	1	1	1	1	0	4	5	1	1	1	1	0	0	1	19	1	0	10.6736	67.6153	0	4	4	2.21502	4.75798	1.09624	2.64482	9.08664	5.77802	1	0	0	0	1	1	2
3811131311	1	52	0	1	1	1	0	4	4	0	1	1	2	1	1	2	1	1	0	12.84	43.4	0	10	10	1.83	5.33	1.23	3.8	9.08664	4.58	1	1	0	1	1	1	2
3811201265	4	72	0	0	1	1	1	1	3	0	0	0	2	0	1	1	25	1	1	6.89	117.5	1	3	12	1.54	3.16	0.82	1.79	10.1	7.5	0	0	1	0	1	1	3
3811221261	4	66	0	0	1	1	1	1	3	0	0	0	2	0	1	3	18	1	0	17.17	77.6	1	4	16	2.73	4.61	0.72	3.34	8.5	5.08	1	0	1	0	1	1	3
3811221262	1	37	0	0	1	0	1	3	3	0	0	0	1	0	1	3	1	1	0	18.02	45.8	1	6	6	3.43	6.06	1.75	3.74	9	4.09	1	1	1	1	1	1	1
3811221263	4	47	1	1	1	1	0	2	5	1	0	0	2	0	1	1	7	1	1	10.14	63.2	1	3	12	5.73	5.31	0.99	3.04	8.1	6.53	1	1	1	0	1	1	2
3811221264	1	45	1	1	1	1	1	3	4	0	0	0	2	1	0	3	0	1	0	20.68	67.3	1	2	2	1.2	3.48	0.65	2.52	8.7	7.15	0	0	1	0	1	1	2
3811221266	4	53	0	0	1	1	1	2	3	0	0	1	1	0	1	1	17	1	1	10.6736	67.6153	1	2	8	2.21502	4.75798	1.09624	2.64482	10.5	5.77802	1	0	0	0	1	1	2
3811221281	1	59	0	1	1	1	1	3	1	0	0	1	1	0	1	1	10	1	1	8.61	63.3	1	1	1	2.4	6.08	1.49	4.39	10.9	4.74	1	1	0	1	1	1	2
3811221282	1	65	1	1	1	1	0	3	3	0	0	1	2	0	1	2	10	1	1	11.71	206.8	0	1	1	1.73	2.45	0.57	1.44	5.8	9.67	1	0	1	0	1	0	3
3811221283	1	42	1	0	1	0	0	3	5	1	0	0	3	1	1	2	0	1	0	13.26	68.1	0	4	4	6.91	3.93	1.63	1.71	10.5	5.47	1	0	1	0	1	1	1
3811221284	2	71	1	0	1	1	0	1	4	0	0	1	1	0	1	1	5	1	1	7.44	75.6	0	2	4	1.16	3.95	0.8	2.97	9.8	4.81	0	0	1	0	1	1	3
3811221285	1	46	1	0	1	0	0	2	4	0	0	1	2	1	1	2	0	1	0	15.66	67.6153	1	1	1	2.21502	4.75798	1.09624	2.64482	10.9	5.77802	1	0	0	0	1	1	2
3811221286	1	76	0	0	1	1	0	2	3	0	0	1	3	0	1	2	20	1	1	13.47	116.5	1	1	1	4.71	5.62	0.89	4.12	10.4	6.79	1	1	1	1	1	1	3
3811221287	1	42	1	0	1	0	1	1	2	0	0	1	2	1	1	2	0	0	0	14.4	67.6153	0	1	1	2.21502	5.39	1.09624	2.64482	10	5.77802	1	1	0	0	1	1	1
4401011401	4	65	1	1	1	1	1	2	3	0	0	0	2	0	1	2	10	1	1	14.7	45.67	1	4.84314	19.3725	2.36	3.68	1.52	2.17	11.2	6.36	1	0	0	0	1	1	3
4401021391	1	64	0	1	1	0	1	3	4	0	0	1	3	1	1	2	0	0	0	14.93	47.5	0	6	6	14.63	7.99	2.8	1.74	13.2	6.12	1	1	1	0	1	1	3
4401021392	3	60	1	1	1	1	0	2	4	0	0	0	2	0	0	1	2	0	0	6.47	52.5	1	2	6	2.16	4.57	1.53	2.1	6.6	5.35	1	0	0	0	1	0	3
4401031381	4	65	1	1	1	0	0	3	3	1	1	0	1	0	0	2	5	0	0	13.8	66.7	1	6	24	0.97	4.26	1.45	2.06	6.1	4.13	0	0	0	0	0	0	3
4401061391	1	47	0	1	1	0	1	1	1	0	0	0	3	0	1	1	1	0	0	6.13	44.9	0	7	7	1.38	5.75	1.22	3.35	7.8	3.92	0	1	0	0	1	1	2
4401061392	2	61	0	1	1	0	1	1	1	0	0	0	2	0	1	1	0	1	0	7.25	44.9	0	8	16	2.36	5.38	1.07	3	7.1	3.35	1	1	0	0	1	1	3
4401081391	3	56	1	1	1	1	0	3	4	0	0	0	2	0	0	1	6	1	1	6.63	62.3	1	1	3	2.21502	4.75798	1.09624	2.64482	12	2.14	1	0	0	0	1	1	2
4401081401	4	66	0	1	1	0	1	1	1	0	0	1	1	0	0	3	12	1	1	17.52	54.5	0	4.84314	19.3725	2.79	6.84	1.04	3.01	15.1	3.74	1	1	0	0	1	1	3
4401091381	1	74	0	1	1	1	1	1	2	0	0	1	1	0	1	1	20	1	0	6.57	62.1	0	10	10	1.81	4.14	0.89	2.14	9.6	3.68	1	0	1	0	1	1	3
4401111381	1	78	0	1	1	0	1	1	1	0	0	1	2	0	1	1	10	1	0	7.6	50	1	4.84314	4.84314	2.57	7.2	1.1	2.98	8	6.41	1	1	0	0	1	1	3
4401111404	3	67	0	1	1	0	1	1	2	0	0	1	3	0	1	1	3	0	0	6.18	52.1	0	4.84314	14.5294	2.21502	4.75798	1.09624	2.64482	6.7	5.05	1	0	0	0	1	0	3
4401131401	1	40	1	1	1	1	0	3	4	1	1	0	3	0	0	1	1	0	0	10.9	67.6153	0	4.84314	4.84314	2.21502	4.75798	1.09624	2.64482	6.9	5.77802	1	0	0	0	1	0	1
4401141381	1	46	1	1	1	0	1	3	2	1	1	0	2	1	0	1	0	1	0	10.39	54.5	1	6	6	2.81	4.92	1.18	2.78	11.8	4.61	1	0	0	0	1	1	2
4401141391	1	79	0	1	1	0	1	1	1	0	0	1	1	0	1	1	10	1	1	7.84	70.3	0	8	8	5.25	6.9	2.11	2.78	7.5	5.42	1	1	1	0	1	1	3
4401151381	3	76	0	1	1	0	1	1	3	0	0	0	1	0	1	1	15	1	0	9.99	76.2	0	13	39	0.93	4.44	0.98	2.56	9.3	4.04	0	0	1	0	1	1	3
4401151401	3	31	0	1	1	1	0	4	4	0	0	0	1	0	0	1	0	1	0	8.74	42.5	0	4.84314	14.5294	2.3	3.47	0.9	2.3	7.2	3.42	1	0	1	0	1	1	1
4401241401	2	46	0	1	1	1	0	2	4	0	0	0	1	1	0	1	0	0	0	4.38	49.9	1	4.84314	9.68627	1.15	4.3	1.09	2.35	5.4	3.15	0	0	0	0	0	0	2
4401301391	4	55	0	1	1	0	1	2	1	0	0	1	1	0	0	1	2	1	1	9.8	43.3	1	5	20	2.06	5.97	1.47	3.54	5.3	4.92	1	1	0	1	1	0	2
4401311391	1	69	1	1	1	0	1	3	1	0	0	0	3	0	1	1	3	1	1	5.15	71.1	0	10	10	1.14	3.76	0.89	1.96	7.1	5.57	0	0	1	0	1	1	3
4401311392	1	73	1	1	1	0	1	1	1	0	0	1	1	0	0	2	8	1	1	15.4	73.1	0	8	8	1.37	3.92	0.59	2.41	14.1	5.2	0	0	1	0	1	1	3
4402051391	1	36	1	1	1	1	0	3	3	0	0	0	2	0	0	3	2	1	0	17.79	70.3	0	6	6	11.23	5.8	2.13	1.44	11	3.87	1	1	1	0	1	1	1
4402121391	1	73	0	1	1	1	0	2	2	0	0	1	1	0	1	1	4	1	1	5.17	85.5	0	5	5	1.98	5.87	1.04	3.31	5.6	3.83	1	1	0	0	1	0	3
4402121392	2	66	0	1	1	1	1	2	1	0	0	1	2	0	1	1	9	1	1	5.63	52.2	0	3	6	2.21502	4.75798	1.09624	2.64482	5.2	5.46	1	0	0	0	1	0	3
4402141381	1	54	0	1	1	0	1	1	2	0	0	0	1	1	0	1	1	1	0	7.71	43.1	0	1	1	1.38	4.43	0.75	2.65	6.3	4.14	0	0	1	0	1	0	2
4402151391	3	79	0	1	1	1	1	2	1	0	0	1	1	0	1	1	20	1	1	9.97	57.6	0	4	12	5.14	4.64	1.54	1.94	9.3	3.31	1	0	0	0	1	1	3
4402191381	1	72	0	1	1	1	1	1	4	0	0	0	2	0	1	1	7	1	0	5.59	45.4	0	12	12	2.73	2.98	0.95	1.11	5.8	2.81	1	0	1	0	1	0	3
4402191391	3	62	1	1	1	1	1	2	1	0	0	1	1	0	1	1	18	1	0	9.71	78.5	0	5	15	2.1	17.12	2.3	1.42	8.2	8.4	1	1	1	0	1	1	3
4402201381	1	73	1	1	1	0	1	2	3	1	0	0	2	1	0	1	0	1	0	5.7	98.4	0	10	10	1.28	4.53	1.28	2.58	7.7	9.92	0	0	0	0	0	1	3
4402211391	3	49	1	1	1	0	1	3	1	1	1	0	2	0	1	1	13	1	1	10.6736	67.6153	1	4	12	2.21502	4.75798	1.09624	2.64482	9.08664	5.77802	1	0	0	0	1	1	2
4403021381	1	74	1	1	1	0	1	2	3	0	0	1	2	0	1	2	10	1	0	13.81	68.1	0	11	11	2.45	494	0.99	2.77	13.6	6.28	1	1	1	0	1	1	3
4403061381	4	72	0	1	1	0	1	1	3	0	0	1	1	0	1	1	24	1	0	8.81	54.1	1	5	20	0.99	5.05	1.08	2.94	6.9	4.04	0	0	0	0	0	0	3
4403061389	4	39	1	1	1	0	1	3	4	1	1	0	1	1	0	3	0	0	0	17.2	83.6	0	10	40	1.93	5.09	0.79	3.04	11.7	4.86	1	0	1	0	1	1	1
4403061401	2	57	1	1	1	0	1	2	2	0	1	0	1	1	1	2	0	1	0	12.59	67.6153	0	5	10	1.46	5.61	1	3.45	13.1	5.77802	0	1	1	1	1	1	2
4403081401	3	70	0	1	0	0	1	1	1	0	0	1	1	0	1	3	20	1	1	41.9	90.8	0	4.84314	14.5294	1.99	5.72	1.44	2.84	17.2	9.08	1	1	0	0	1	1	3
4403091381	2	67	0	1	1	0	1	1	2	0	0	1	1	0	1	1	1	1	0	8.85	57.6	1	4	8	2.9	5.3	1.01	2.28	6.2	5.1	1	1	1	0	1	0	3
4403101381	1	73	1	1	1	0	1	1	3	1	0	0	2	0	1	1	1	1	0	9.26	97	0	10	10	1.22	3.65	0.89	1.9	6.5	3.47	0	0	1	0	1	0	3
4403101391	4	57	1	1	1	1	0	2	3	0	1	0	3	0	1	1	7	1	1	7.28	75	1	2	8	3.22	5.52	1.34	3.51	7	3.99	1	1	0	1	1	1	2
4403101392	1	33	0	1	1	0	1	3	2	0	0	0	2	0	0	1	7	1	1	6.29	52.7	1	5	5	1.61	3.9	0.66	2.27	6.1	2.34	0	0	1	0	1	0	1
4403101393	4	64	0	1	1	0	1	1	3	0	0	1	1	0	1	1	12	1	1	10.67	58.2	1	2	8	1.28	3.87	0.81	2.15	13.3	11.11	0	0	1	0	1	1	3
4403101394	2	48	0	1	1	0	1	2	3	0	0	0	3	0	1	1	2	1	0	8.41	38.1	1	3	6	1.96	4.13	0.92	2.15	8.6	4.04	1	0	1	0	1	1	2
4403131381	1	49	0	1	1	0	1	1	3	0	0	1	2	0	1	1	10	1	1	6.5	69.5	0	12	12	1.37	3.8	1.17	2.23	7.9	5.61	0	0	0	0	0	1	2
4403131382	1	71	1	1	1	0	1	1	1	0	0	1	1	1	0	2	0	0	0	12.53	69	0	1	1	2.47	6.77	1.2	3.82	10.6	5.76	1	1	0	1	1	1	3
4403241401	4	72	0	1	1	1	1	2	2	0	0	1	2	0	1	1	4	1	0	8.05	60.8	1	4.84314	19.3725	2.29	4.73	0.85	2.52	6.2	3.25	1	0	1	0	1	0	3
4403241402	4	63	0	1	1	0	1	2	2	0	0	1	1	0	1	2	12	1	1	12.45	42.8	1	2	8	2.36	3.68	0.79	1.82	10.5	5.37	1	0	1	0	1	1	3
4403241403	4	54	0	1	1	0	1	2	3	0	0	0	3	0	0	3	1	0	0	18.36	44.9	1	4.84314	19.3725	2.97	4.86	0.82	2.69	11.8	5.19	1	0	1	0	1	1	2
4403241404	2	45	1	1	1	0	0	3	4	1	1	0	2	1	0	3	10	1	0	24.94	48.6	0	6	12	2.21502	4.75798	1.09624	2.64482	14.3	3.19	1	0	0	0	1	1	2
4403241408	3	65	0	1	1	0	1	1	2	0	0	0	1	0	1	1	10	1	0	10.23	44.6	0	4.84314	14.5294	1.31	3.83	0.92	2.01	8.5	4.68	0	0	1	0	1	1	3
4403251401	2	47	1	1	1	1	1	3	4	1	1	0	2	0	1	2	6	1	0	14.96	61.3	0	4.84314	9.68627	2.2	6.49	0.99	4.13	13.5	4.77	1	1	1	1	1	1	2
4403291401	1	52	1	1	1	1	0	3	5	0	1	0	1	0	1	2	8	1	1	13.12	52.2	0	8	8	16.32	10.79	1.42	2.75	13.1	3.62	1	1	0	0	1	1	2
4404011381	1	44	1	1	1	0	1	2	4	0	0	0	2	1	0	1	0	0	0	9.93	53.7	1	1	1	1.36	4.05	0.98	2.68	13.2	3.8	0	0	1	0	1	1	1
4404021381	1	68	0	1	1	0	1	1	1	0	0	1	2	0	1	1	1	1	0	7.3	54.6	1	2	2	2.57	5.61	1.1	2.98	6.3	6.45	1	1	0	0	1	0	3
4404021401	1	47	1	1	1	0	1	2	3	0	1	0	3	0	1	1	2	1	1	7.15	61	0	3	3	0.7	2.58	0.78	1.2	6.2	3.67	0	0	1	0	1	0	2
4404031401	1	24	1	1	1	1	0	4	5	1	1	0	2	1	1	1	0	1	0	10.99	71.6	1	10	10	6.43	6.33	1.29	2.37	10	3.46	1	1	0	0	1	1	1
4404031402	1	71	0	1	0	0	1	1	1	0	0	1	2	0	1	1	20	1	1	5.29	59.1	0	10	10	2.44	4.36	0.87	2.22	11.5	4.8	1	0	1	0	1	1	3
4404051401	2	66	1	1	1	0	1	3	3	0	1	0	2	0	1	1	1	1	0	8.6	67.6	0	4.84314	9.68627	2.05	3.59	0.71	1.84	7.8	3.78	1	0	1	0	1	1	3
4404091401	1	50	1	1	1	1	0	4	5	0	1	0	2	0	1	1	5	1	0	9.55	75.2	0	8	8	11.56	5.48	2.03	1.69	6.6	2.55	1	1	1	0	1	0	2
4404101402	4	57	0	0	1	0	1	2	2	0	0	1	3	0	1	1	20	1	1	5.84	54.6	1	4.84314	19.3725	0.91	3.34	0.89	1.75	7.3	5.33	0	0	1	0	1	1	2
4404111401	4	53	0	1	1	0	1	2	2	0	0	0	2	1	1	2	0	1	0	12.42	44.8	1	6	24	1.8	6.73	0.57	3.2	11.7	3.48	1	1	1	0	1	1	2
4404111403	4	70	1	1	1	0	1	2	2	0	0	0	2	0	1	1	2	1	0	8.07	54.6	0	4.84314	19.3725	3.5	5.28	1.49	2.37	7.7	6.27	1	1	0	0	1	1	3
4404171401	4	68	0	1	1	0	1	2	2	0	0	0	1	0	1	1	6	1	1	6.98	70.6	1	4.84314	19.3725	1.46	4.9	1.2	2.75	8.7	4.09	0	0	0	0	0	1	3
4404201391	3	66	0	1	1	0	1	2	3	0	0	0	2	0	1	1	4	1	1	7.1	157.2	1	4	12	1.69	3.9	0.82	2.07	9.1	12.02	0	0	1	0	1	1	3
4404201392	3	62	0	1	1	0	1	1	3	0	0	1	1	0	1	2	15	1	1	13.98	44.8	1	2	6	1.12	4.91	1.18	2.67	12	4.83	0	0	0	0	0	1	3
4404201393	2	50	1	1	1	1	0	3	3	0	0	0	1	0	0	2	1	1	0	16.29	50.4	0	6	12	0.52	4.59	1.3	2.49	10.2	2.94	0	0	0	0	0	1	2
4404241401	4	75	0	1	1	0	1	1	2	0	0	1	2	0	0	2	10	0	1	16.52	53.6	1	4.84314	19.3725	0.9	4.63	1.07	2.61	9.7	5.57	0	0	0	0	0	1	3
4404291391	2	49	1	0	1	1	1	3	5	0	0	0	2	0	1	2	4	1	1	13.43	55	1	6	12	2.69	3.6	0.66	1.9	11	4.73	1	0	1	0	1	1	2
4404291401	3	67	0	1	0	0	1	1	2	0	0	1	1	0	1	2	3	1	0	13.02	44.5	0	4.84314	14.5294	2.21502	4.75798	1.09624	2.64482	14.8	2.97	1	0	0	0	1	1	3
4404291402	3	63	0	0	1	0	1	1	2	0	0	1	1	0	1	2	7	1	1	12.4	46.3	1	4.84314	14.5294	2.17	4.09	0.58	2.38	12.6	2.09	1	0	1	0	1	1	3
4405011391	1	56	0	1	1	0	1	1	2	0	0	0	1	0	1	1	11	1	0	5.76	71.3	1	2	2	1.22	6.68	1.44	3.88	5.6	7.43	0	1	0	1	1	0	2
4405021381	4	67	0	1	1	0	1	1	1	0	0	1	2	0	1	2	2	1	0	14	57.7	1	1	4	4.33	5.14	1.22	2.63	10.5	4.97	1	0	0	0	1	1	3
4405041381	1	72	1	1	0	0	1	1	1	1	1	0	1	1	1	1	0	0	0	7.4	76.1	1	2	2	0.82	4.43	0.71	4	9.3	4.04	0	0	1	1	1	1	3
4405071381	1	66	1	1	1	0	1	1	2	0	0	0	1	0	0	2	5	1	0	13.21	315.8	1	2	2	2.22	2.23	0.37	0.78	10	18.4	1	0	1	0	1	1	3
4405071382	2	71	1	1	1	0	1	2	3	0	0	1	3	0	1	1	4	1	1	10.8	68.8	0	11	22	2.84	4.58	1.02	2.13	6.4	6.1	1	0	1	0	1	0	3
4405081391	2	57	0	1	1	0	1	2	2	0	0	0	1	1	0	2	0	1	0	15.55	115.1	1	6	12	1.96	4.73	1.07	2.38	8.8	16.86	1	0	0	0	1	1	2
4405091391	1	60	0	1	1	0	1	2	2	0	0	1	1	0	0	2	0	1	1	13.99	32.7	1	2	2	1	3.33	1.07	1.56	12.9	3.52	0	0	0	0	0	1	3
4405101401	4	61	1	1	1	1	0	4	4	0	0	0	2	1	0	1	0	1	0	6.3	40.3	1	3	12	2.19	2.26	0.76	0.81	6.2	2.33	1	0	1	0	1	0	3
4405121391	1	72	1	1	1	0	1	2	2	0	0	1	1	0	1	1	5	1	0	6.06	60.6	0	2	2	1.28	4.71	1.42	2.14	6.9	2.19	0	0	0	0	0	0	3
4405131381	2	60	1	1	1	0	1	2	3	0	0	1	1	0	1	1	10	1	1	6.5	59.5	0	10	20	0.52	4.02	1.05	2.46	12.5	5.03	0	0	0	0	0	1	3
4405131382	1	75	0	1	1	0	1	1	3	0	0	1	2	0	0	1	7	1	1	10	69.2	0	10	10	1.25	4.84	1.54	2.81	9.4	16.78	0	0	0	0	0	1	3
4405131401	4	67	0	1	1	0	1	2	3	0	0	0	1	1	0	1	0	1	0	7.1	49.7	1	4.84314	19.3725	2.08	3.47	1.56	2.37	7.4	5.27	1	0	1	0	1	1	3
4405131408	4	49	1	1	1	0	1	2	4	0	0	0	2	0	1	1	8	1	1	11.08	67.3	1	4.84314	19.3725	2.2	5.16	1.06	2.88	8	5.79	1	0	0	0	1	1	2
4405161391	3	60	1	1	1	1	1	4	4	0	0	0	2	0	1	1	15	1	0	7.15	65.4	1	8	24	2.04	3.61	0.93	1.81	7.4	4.54	1	0	1	0	1	1	3
4405161392	1	57	0	1	1	1	0	2	4	0	0	0	1	0	1	2	7	1	0	11.56	61.3	0	3	3	1.52	3.2	0.95	1.53	10.7	4.24	0	0	1	0	1	1	2
4405171381	1	66	0	1	1	0	1	1	3	0	0	1	1	0	1	1	7	0	0	6.62	53.1	1	8	8	1.08	4.05	1.19	2.16	7.1	5.13	0	0	0	0	0	1	3
4405171382	2	65	0	1	1	0	1	2	3	0	0	1	1	0	1	1	8	1	1	10.6	82.3	0	10	20	1.21	4.51	1.7	1.84	13.4	14.56	0	0	1	0	1	1	3
4405211391	3	53	0	1	1	0	1	2	2	0	0	0	3	0	0	3	12	1	1	16.61	44.5	0	2	6	1.52	5.63	1.55	1.75	14.1	3.64	0	1	1	0	1	1	2
4405211392	2	46	1	1	1	1	0	4	4	1	1	0	3	1	0	1	0	1	0	9.63	60.6	1	2	4	1.31	4.5	1.28	2.55	10.3	5.55	0	0	0	0	0	1	2
4405221381	3	65	1	1	1	0	1	3	4	1	0	0	2	1	1	1	0	1	0	9.79	61.3	0	12	36	0.99	3.82	1.22	2.02	8.1	7.05	0	0	0	0	0	1	3
4405251391	1	59	0	1	1	1	1	2	2	0	0	1	1	1	0	2	0	0	0	15.37	50.1	0	4	4	2.47	5.74	1.04	3.12	11.3	5.5	1	1	0	0	1	1	2
4405291381	3	46	0	1	1	0	1	1	3	0	0	1	1	1	0	2	0	0	0	16.47	69.5	0	11	33	0.74	4.75	1.52	2.23	11.4	5.61	0	0	0	0	0	1	2
4405301381	3	54	0	1	1	0	1	1	3	0	0	1	1	0	1	2	5	0	1	11.2	69.5	1	3	9	1.37	3.8	1.17	2.23	7.9	5.6	0	0	0	0	0	1	2
4405301391	1	61	1	1	1	1	0	4	4	0	0	1	1	0	0	2	10	1	1	12.88	45.9	1	4.84314	4.84314	2	4.9	1.17	2.61	10.5	4.8	1	0	0	0	1	1	3
4405301401	2	37	1	1	1	1	0	3	4	0	1	0	2	1	0	2	0	1	0	14	84	0	4.84314	9.68627	1.27	4.14	0.94	2.22	11.2	6.63	0	0	1	0	1	1	1
4405311401	1	37	1	1	1	1	0	3	4	1	1	0	1	1	0	1	0	1	0	10.85	65.2	0	4.84314	4.84314	2.21502	4.75798	1.09624	2.64482	9	4.05	1	0	0	0	1	1	1
4405311402	4	56	0	1	1	0	1	2	3	0	0	1	2	0	1	2	6	1	1	13.93	62.3	1	4.84314	19.3725	4.76	4.56	0.93	1.77	11.1	4.3	1	0	1	0	1	1	2
4406011381	1	89	0	1	1	0	1	2	3	0	0	1	1	0	1	1	10	1	1	8.39	61.5	0	12	12	1.61	4.6	0.92	2.58	5.8	4.64	0	0	1	0	1	0	3
4406011391	2	67	1	1	1	1	0	4	4	0	0	1	1	1	1	1	0	0	0	7.39	45.8	1	4	8	1.2	18	1.18	2.65	7.1	4.73	0	1	0	0	1	1	3
4406021391	1	53	1	1	1	1	1	1	4	1	0	0	1	0	1	2	6	1	1	12.63	135.3	1	6	6	2.04	4.41	0.99	2.29	12.9	8.11	1	0	1	0	1	1	2
4406021392	1	46	1	1	1	1	0	3	4	0	0	0	2	1	1	1	0	0	0	10.92	67.6153	1	2	2	2	12.7	1.2	1.31	9.08664	5.77802	1	1	0	0	1	1	2
4406031401	3	64	0	1	1	0	1	2	3	1	1	0	3	0	1	1	10	1	0	7.6	42.7	1	4.84314	14.5294	3.41	5.26	1.58	2.54	6.3	6.21	1	1	1	0	1	0	3
4406081391	1	68	1	1	1	0	1	2	3	0	0	1	1	0	1	1	3	1	0	7.9	54.8	0	5	5	2.1	12.7	1.2	1.3	13.5	4.5	1	1	0	0	1	1	3
4406091391	1	46	1	1	1	1	0	3	4	0	0	0	1	1	0	1	0	0	0	10.17	64.2	0	8	8	2.42	5.1	0.97	2.74	9.1	4.53	1	0	1	0	1	1	2
4406101391	1	78	0	1	1	0	1	1	3	0	0	1	1	0	0	2	8	1	1	15.55	115	0	8	8	2.15	3.89	0.88	2.03	10	16.85	1	0	1	0	1	1	3
4406101392	1	76	0	1	1	0	1	1	2	0	0	1	1	1	1	1	0	0	1	9.27	67.6153	0	4	4	2.21502	4.75798	1.09624	2.64482	8.1	5.77802	1	0	0	0	1	1	3
4406141401	4	66	0	1	1	1	1	2	2	0	0	1	2	0	1	2	25	1	1	16.29	33.9	1	4.84314	19.3725	0.83	3.22	1.31	1.23	10.1	4.52	0	0	0	0	0	1	3
4406151401	1	49	1	1	0	0	1	2	4	1	0	0	1	0	0	3	17	0	1	24.23	67.3	1	4.84314	4.84314	1.03	3.11	0.69	1.71	15.1	8.26	0	0	1	0	1	1	2
4406201401	1	39	1	1	1	0	0	3	5	1	0	0	3	1	0	1	0	1	0	6.26	67.6153	1	4.84314	4.84314	1.64	3.61	0.82	1.95	7.8	5.77802	0	0	1	0	1	1	1
4406201402	1	49	1	1	1	1	0	3	5	1	1	0	3	0	1	1	7	1	0	10.31	67.6153	1	4.84314	4.84314	2.21502	4.75798	1.09624	2.64482	7.2	3.98	1	0	0	0	1	1	2
4406201403	1	31	1	1	0	1	1	4	3	0	0	0	3	0	0	2	3	0	0	14.92	70.6	0	4.84314	4.84314	5.29	4.82	0.74	1.87	11.2	3.93	1	0	1	0	1	1	1
4406201404	4	48	1	1	1	1	0	4	5	0	1	0	2	0	0	1	8	1	0	6.48	75.2	1	4.84314	19.3725	0.79	2.98	0.86	1.56	6.5	4.36	0	0	1	0	1	0	2
4406201405	2	60	0	1	1	0	1	2	1	0	0	0	2	0	1	1	1	1	1	7.33	50.6	1	4.84314	9.68627	2.06	7.33	1.51	1.99	10.2	4.8	1	1	0	0	1	1	3
4406201408	1	46	1	1	1	1	1	1	3	1	0	0	1	0	0	1	6	1	1	8.1	83.5	0	4.84314	4.84314	1.17	4.31	0.85	2.6	6.8	4.8	0	0	1	0	1	0	2
4406201409	1	61	1	1	1	1	1	3	4	1	0	0	1	0	0	1	8	1	0	9.26	64.8	0	4.84314	4.84314	0.83	3.8	0.91	2.11	8.9	5	0	0	1	0	1	1	3
4406261391	1	78	0	1	1	0	1	2	3	0	0	1	1	0	1	1	12	1	1	9.64	56.5	1	6	6	0.83	3.79	1.22	1.81	7.6	5.92	0	0	0	0	0	1	3
4406291381	1	53	1	1	1	0	1	3	3	0	0	1	2	0	0	2	6	1	0	15.35	84.6	1	8	8	1.87	4.33	0.84	2.4	10.6	4.39	1	0	1	0	1	1	2
4406291391	1	79	1	1	1	1	0	2	4	0	1	1	2	0	0	1	12	1	1	10.83	78.5	0	5	5	3.33	3.97	0.67	1.92	9.1	4.27	1	0	1	0	1	1	3
4406291392	3	69	1	1	1	1	0	2	4	0	0	1	1	0	0	2	18	1	1	11.32	72.3	1	5	15	1.41	4.75	1.55	2.14	13.9	6.24	0	0	1	0	1	1	3
4406301401	4	52	0	1	1	1	0	3	3	0	0	0	2	0	1	2	13	1	1	14.73	63.6	1	4.84314	19.3725	3.38	5.18	0.97	2.29	8.6	5.14	1	1	1	0	1	1	2
4407011401	1	63	1	1	1	0	1	2	3	1	1	0	1	0	1	1	10	1	1	9.45	57.3	0	4.84314	4.84314	0.92	3.55	0.88	1.85	11.4	7.25	0	0	1	0	1	1	3
4407061392	3	42	1	1	1	1	0	3	4	1	0	0	3	1	1	2	0	1	0	15.73	67.6153	0	5	15	6.78	5.5	0.87	2.34	10.7	5.77802	1	1	1	0	1	1	1
4407061393	1	46	1	1	1	0	1	3	3	0	1	0	1	0	0	2	4	1	1	12.01	56	1	1	1	2.15	3.89	0.83	2.03	12.6	6.47	1	0	1	0	1	1	2
4407071401	2	66	1	1	1	1	0	3	3	0	1	0	1	0	1	1	11	1	0	9.64	84.5	1	4	8	0.94	5.34	0.92	3.2	7.6	4.37	0	1	1	0	1	1	3
4407091391	3	55	1	1	1	1	0	3	4	0	0	0	2	1	0	1	0	1	0	6.3	67.6153	0	6	18	1.2	4.7	1.2	3.02	7.1	5.77802	0	0	0	0	0	1	2
4407131381	3	67	0	0	1	0	1	2	3	0	0	0	1	0	0	1	3	1	0	6.15	63.1	1	5	15	0.7	4.06	1.09	2.14	7.1	6.73	0	0	0	0	0	1	3
4407141381	2	47	0	1	1	0	1	3	3	0	0	0	2	1	1	1	0	0	0	8.24	54.8	1	3	6	1.52	3.52	1.07	1.54	9.4	5.22	0	0	0	0	0	1	2
4407151381	1	42	1	1	1	0	1	3	3	0	0	1	2	0	1	1	3	1	0	10.57	67.3	1	5	5	1.58	3.58	0.81	1.93	7.6	4.51	0	0	1	0	1	1	1
4407151391	3	69	0	1	1	0	1	2	2	0	0	1	2	0	1	1	12	1	1	8.59	46.6	1	6	18	2.35	4.85	1.07	2.49	8	4.71	1	0	0	0	1	1	3
4407161391	2	58	1	1	1	0	0	2	4	1	0	0	1	0	1	1	5	1	1	5.42	70.1	1	6	12	0.39	3.16	1.26	1.32	11.9	3	0	0	0	0	0	1	2
4407181391	3	40	1	1	1	1	0	3	4	0	0	0	1	1	0	2	0	0	0	15.42	46.8	1	7	21	1.24	4.51	0.84	2.64	12.6	4.03	0	0	1	0	1	1	1
4407201401	4	75	1	1	1	1	0	3	4	0	1	0	2	1	1	1	0	1	0	10.6736	70.8	1	5	20	2.21502	4.75798	1.09624	2.64482	6.2	5.9	1	0	0	0	1	0	3
4407281391	3	44	1	1	1	1	0	3	4	0	1	0	1	0	0	1	2	1	0	7.31	46.5	1	7	21	1.51	3.06	0.73	1.56	6.4	6.46	0	0	1	0	1	0	1
4407281401	4	44	0	1	1	0	1	2	2	0	0	1	1	0	0	1	8	1	0	10.6736	67.6153	1	5	20	2.21502	4.75798	1.09624	2.64482	10.8	5.77802	1	0	0	0	1	1	1
4407281402	1	61	1	1	1	0	1	3	2	0	1	0	1	1	0	1	0	0	0	7.74	67.6153	1	7	7	2.21502	4.75798	1.09624	2.64482	6.8	5.77802	1	0	0	0	1	0	3
4408081381	3	68	1	1	1	0	1	1	3	0	0	0	2	0	1	1	2	1	0	5.31	81.2	1	4	12	2.21	3.98	0.87	1.99	6.3	6.1	1	0	1	0	1	0	3
4408111381	3	52	1	1	1	0	1	2	3	0	0	1	2	1	0	1	0	0	0	10.42	53.5	0	10	30	11.88	6.01	1.82	2.12	10	3.57	1	1	1	0	1	1	2
4408111382	1	65	1	1	1	0	1	2	2	0	0	1	2	0	1	1	0	1	0	5.4	77.1	0	13	13	0.92	3.43	0.68	1.98	5.3	3.6	0	0	1	0	1	0	3
4408111391	2	43	1	1	0	0	1	3	2	0	1	0	1	0	0	3	2	1	0	19.15	48.9	1	6	12	0.67	3.83	1.09	1.97	13.5	4.63	0	0	0	0	0	1	1
4408111392	2	66	1	1	1	0	1	3	2	0	0	0	3	0	1	1	10	1	1	6.03	138.6	0	4	8	1.5	3.23	0.82	1.58	6.6	5.25	0	0	1	0	1	0	3
4408121391	4	69	1	1	1	0	1	2	2	0	0	0	3	0	1	1	14	1	1	7.44	63.5	1	5	20	2.54	3.66	1.23	1.6	6.9	4.73	1	0	0	0	1	0	3
4408121392	1	56	0	1	1	0	1	2	2	0	0	1	2	0	0	1	10	1	1	4.82	50.1	1	4	4	2.21502	4.75798	1.09624	2.64482	10.6	5.55	1	0	0	0	1	1	2
4408181381	1	89	1	1	1	0	1	2	2	0	0	1	1	0	1	1	5	1	0	4.39	96.1	0	14	14	0.56	4.5	1.43	2.55	5.9	5.02	0	0	0	0	0	0	3
4408191401	1	66	0	1	1	0	1	1	2	0	0	1	2	0	0	3	7	1	1	19.64	59.1	1	3	3	1.03	3.51	1.24	1.43	12.5	4.06	0	0	0	0	0	1	3
4408201401	2	53	0	1	0	0	1	2	2	0	0	0	2	0	1	1	10	1	0	9.6	67.6153	1	2	4	2.21502	4.75798	1.09624	2.64482	9.8	5.77802	1	0	0	0	1	1	2
4408271401	3	48	0	1	1	1	1	3	3	0	0	0	1	0	0	1	2	1	0	10.36	55.7	1	4	12	1.25	3.72	0.74	2.03	6.6	3.18	0	0	1	0	1	0	2
4408291401	2	62	0	1	1	0	1	2	3	0	0	1	2	0	1	1	2	1	0	10.03	47.3	1	3	6	1	4	1.63	2.07	7.2	6.96	0	0	1	0	1	1	3
4409041381	1	66	0	1	1	0	1	2	2	0	0	1	1	0	1	2	3	1	0	14.13	54.2	1	8	8	1.16	9.07	1.24	5.81	10.4	3.45	0	1	0	1	1	1	3
4409061401	1	34	1	1	1	1	0	3	3	0	1	0	1	1	0	2	0	1	0	12.65	71.4	1	3	3	2.21502	4.75798	1.09624	2.64482	9.6	4.13	1	0	0	0	1	1	1
4409071381	1	73	0	1	1	0	1	3	3	0	0	1	1	0	1	1	2	1	0	9.28	59.8	1	5	5	1.62	4.5	0.79	2.54	8.2	3.96	0	0	1	0	1	1	3
4409071382	1	56	1	1	1	0	1	2	3	0	0	1	2	0	1	2	10	1	0	12.05	75	1	10	10	1.07	3.95	0.73	2.23	9.5	3.54	0	0	1	0	1	1	2
4410041401	1	66	0	1	1	1	1	1	3	0	0	1	2	0	1	1	2	1	0	7.13	87.9	1	4	4	2.3	3.35	0.82	1.58	7.8	7.77	1	0	1	0	1	1	3
4410051381	1	53	1	1	1	0	1	3	3	0	0	1	2	0	1	2	5	1	0	11.78	79.7	1	8	8	1.53	3.87	0.7	2.51	9.1	5.96	0	0	1	0	1	1	2
4410061401	3	76	1	1	1	0	1	2	2	0	1	1	1	0	1	1	12	1	1	9.3	84.3	0	6	18	1.74	3.28	0.6	2.04	12	4.96	1	0	1	0	1	1	3
4410061402	4	69	0	1	1	0	1	1	2	0	0	0	1	0	1	1	19	0	1	6.51	68.2	1	4	16	1.41	4.82	0.97	2.88	8	4.63	0	0	1	0	1	1	3
4410061403	2	68	1	1	1	0	1	2	2	0	0	0	1	0	1	1	10	1	1	7.6	54.8	0	6	12	1.45	4.09	0.78	2.58	8.2	8.21	0	0	1	0	1	1	3
4410071401	1	41	1	1	1	1	0	3	5	1	1	0	2	1	1	2	0	0	0	11.27	70.9	0	6	6	7.64	4.87	0.78	1.63	8.7	5.63	1	0	1	0	1	1	1
4410121401	3	46	1	1	1	1	1	3	3	1	1	0	1	1	1	1	0	1	0	11.1	73.2	0	2	6	6.33	5.93	0.9	2.41	9.1	4.5	1	1	1	0	1	1	2
4410161402	4	68	0	1	1	1	0	2	4	0	0	1	2	0	1	1	7	1	0	8.56	61.5	1	5	20	1.06	4.05	1.19	2.14	6.2	5.1	0	0	0	0	0	0	3
4410161403	4	64	0	1	1	0	1	2	2	0	0	0	1	0	0	1	4	1	0	7.05	61.1	1	4	16	1.7	4.21	1.11	2.31	8.4	5.2	1	0	0	0	1	1	3
4410161404	4	71	1	1	1	1	0	2	3	0	0	0	1	1	0	1	0	0	0	7.43	73.9	1	4	16	1.43	4.25	0.96	2.55	11.4	6.93	0	0	1	0	1	1	3
4410191381	1	77	1	1	1	0	1	2	3	0	0	1	1	0	1	2	15	1	1	12.04	94.9	0	12	12	2.21502	4.75798	1.09624	2.64482	10.5	6.74	1	0	0	0	1	1	3
4410231381	1	79	1	1	1	0	1	3	2	0	0	1	3	0	1	2	5	1	0	14.89	77.7	0	12	12	1.88	2.34	0.65	1.1	11.6	5.65	1	0	1	0	1	1	3
4410261381	1	63	1	1	1	0	1	2	3	0	0	0	2	0	1	1	2	1	0	5.93	92.6	0	5	5	0.87	4.77	1.06	3.03	6.2	6.77	0	0	0	0	0	0	3
4410261401	4	57	0	1	1	1	0	1	4	0	0	1	1	0	0	1	7	1	0	8.77	67.6153	1	4	16	0.97	3.24	0.8	1.89	8.9	5.77802	0	0	1	0	1	1	2
4410261402	4	52	0	1	1	0	0	3	3	0	0	0	1	0	1	1	17	0	1	9	57.7	1	3	12	2.21502	4.75798	1.09624	2.64482	6.6	5.2	1	0	0	0	1	0	2
4410271401	1	47	0	1	1	0	0	1	4	0	0	0	2	0	0	1	1	0	0	9.02	63.7	0	3	3	1.51	5.08	1.15	2.97	8.6	3.26	0	0	0	0	0	1	2
4410291401	4	73	1	1	1	1	0	2	3	1	0	0	2	0	0	2	1	1	1	13.12	67.1	1	5	20	0.9	3.94	0.92	2.02	12.7	6.07	0	0	1	0	1	1	3
4410291402	4	77	0	1	1	1	0	1	4	0	0	1	1	0	0	1	5	1	1	5.4	58.8	1	6	24	1.23	5.76	1	3.93	5.6	2.54	0	1	1	1	1	0	3
4410291403	4	72	0	1	0	0	0	2	3	0	0	0	2	1	0	1	0	0	0	10.6736	67.6153	1	4	16	2.21502	4.75798	1.09624	2.64482	11.5	5.77802	1	0	0	0	1	1	3
4411041401	4	56	0	1	1	1	0	3	4	0	0	0	3	0	0	1	0	1	0	5.57	50.6	1	5	20	1.45	5.14	0.96	3.18	6.3	5.18	0	0	1	0	1	0	2
4411041402	1	53	1	1	1	0	1	2	3	1	0	0	3	0	0	3	5	0	1	17.3	71.8	1	3	3	1.52	4.65	1.12	2.89	11.5	4.24	0	0	0	0	0	1	2
4411051381	1	25	1	1	1	0	1	2	3	0	0	0	2	0	0	1	0	0	0	10.6736	81	1	3	3	2.21502	4.75798	1.09624	2.64482	8	4.46	1	0	0	0	1	1	1
4411051401	1	49	0	1	1	0	1	2	4	0	0	0	3	1	1	2	0	1	1	14.5	67.6153	1	3	3	2.21502	4.75798	1.09624	2.64482	11.3	5.77802	1	0	0	0	1	1	2
4411181391	1	41	1	1	1	0	1	3	3	1	1	0	2	0	0	1	1	1	0	10.52	78.4	0	6	6	2.03	4.24	0.89	2.3	9.7	6.86	1	0	1	0	1	1	1
4412091381	3	50	1	1	1	0	1	3	3	0	0	0	1	1	0	2	0	1	0	13.86	73.6	1	6	18	2.25	3.96	0.52	2.39	10.1	5.54	1	0	1	0	1	1	2
4412091391	3	56	1	1	1	0	0	3	4	1	1	0	3	0	1	1	25	1	1	8.23	63	0	5	15	2.1	5.02	0.94	2.84	7.8	3.22	1	0	1	0	1	1	2
4412091392	1	48	1	1	1	0	1	3	4	0	1	0	1	1	1	2	1	0	0	11.11	65	1	5	5	2.06	5.32	1.2	4.05	10.4	3.7	1	1	0	1	1	1	2
4412091393	3	65	1	1	1	0	1	2	2	0	0	0	1	0	1	1	10	1	0	10.46	49.8	1	8	24	2.07	5.73	1.66	3.71	9.7	3.43	1	1	1	1	1	1	3
4412121391	3	65	1	1	1	0	1	2	3	0	0	1	1	1	0	2	1	0	0	11.37	50.1	1	8	24	5.7	2.61	1.61	3.7	7.6	3.3	1	0	1	1	1	1	3
4412171381	1	67	0	1	1	0	1	1	2	0	0	1	1	0	1	3	20	1	0	17.23	44.6	0	10	10	1.64	5.68	1.4	3.14	12.9	5.47	0	1	0	0	1	1	3
4412181381	2	39	1	1	1	0	1	3	4	1	1	0	3	1	1	3	0	0	0	17.7	64.3	0	6	12	2.01	3.98	0.72	2.36	9.5	4.57	1	0	1	0	1	1	1
4412251381	1	52	1	1	1	0	1	1	3	0	0	0	1	0	1	1	15	1	0	3.77	66.2	1	6	6	0.74	5.04	0.91	3.18	7.1	3.97	0	0	1	0	1	1	2
4412251382	1	47	0	1	1	0	1	1	2	0	0	0	3	0	1	1	13	1	1	8.41	38.1	0	10	10	1.96	4.13	0.92	2.15	6.9	4.04	1	0	1	0	1	0	2
4412251401	1	56	0	1	1	0	1	2	3	0	0	1	1	0	1	1	1	1	0	6.52	52.8	1	5	5	1.68	4.32	1.32	2.43	6.7	4.08	0	0	0	0	0	0	2
4412261401	3	47	0	1	1	0	1	2	3	0	0	0	1	0	0	1	13	1	1	6.24	70.4	1	2	6	1.56	6.13	1.12	2.83	6.2	6.31	0	1	0	0	1	0	2
4412271401	1	46	1	1	1	1	1	3	4	0	1	0	1	0	0	1	13	1	1	10.72	79.8	0	4.84314	4.84314	2.32	4.14	1.76	2.31	9.6	2.36	1	0	1	0	1	1	2
4412271402	2	42	1	1	1	1	1	3	4	1	1	0	2	0	1	2	13	1	0	11.4	48.27	0	4.84314	9.68627	4.28	6.05	1.09624	2.64482	8.1	5.34	1	1	0	0	1	1	1
4412281381	3	66	0	1	1	0	1	1	2	0	0	1	2	0	1	1	4	0	0	10.5	64.3	1	10	30	2.01	3.98	0.72	2.36	9.8	3.57	1	0	1	0	1	1	3
4412281401	4	72	0	1	1	0	1	1	2	0	0	1	1	0	1	1	10	1	1	7.44	44.8	1	4.84314	19.3725	1.68	3.57	0.98	2.45	6.2	4.32	0	0	1	0	1	0	3
4412291381	2	67	1	1	1	1	1	1	2	1	1	1	2	0	1	2	3	1	0	14.8	66.7	0	6	12	0.97	4.26	1.45	2.06	9	4.13	0	0	0	0	0	1	3
4412311401	4	72	0	1	1	0	1	1	1	0	0	1	1	1	1	1	1	1	0	7.37	52.6	1	4.84314	19.3725	1.68	4.32	1.41	2.31	6.7	6.47	0	0	0	0	0	0	3
4412311402	1	51	0	1	1	0	1	2	2	0	0	0	1	1	1	1	1	1	0	7.2	56.3	0	4.84314	4.84314	2.62	3.47	1.28	2.1	6.4	2.89	1	0	0	0	1	0	2
4901021411	1	72	0	0	1	0	1	1	1	0	0	1	2	0	1	1	2	1	1	7.4	52	0	3	3	1.01	4.87	1.26	3.11	7	4.6	0	0	0	0	0	1	3
4901021421	1	72	0	0	1	0	1	1	1	0	0	1	2	0	1	1	3	1	1	10.74	77	0	10	10	2.37	4.47	0.83	2.62	9.8	6.7	1	0	1	0	1	1	3
4901021422	1	77	0	0	1	0	1	1	1	0	0	1	2	0	1	1	3	1	1	5.3	48	0	6	6	1.07	3.61	1.26	1.99	5.7	7	0	0	0	0	0	0	3
4901091411	1	73	1	1	1	1	0	4	5	0	0	1	1	0	1	1	10	1	1	4.5	52	1	4	4	0.79	2.22	0.82	0.99	7	5.6	0	0	1	0	1	1	3
4901091412	1	48	0	0	1	0	1	3	3	0	0	1	1	0	1	3	17	1	0	22.7	60.1	1	2	2	0.88	3.51	1.21	1.79	9.5	4.1	0	0	0	0	0	1	2
4901091413	1	70	0	1	1	0	1	1	1	0	0	1	2	0	1	1	7	0	0	5.8	45	1	2	2	1.67	4.83	1.02	2.97	7.3	4.9	0	0	1	0	1	1	3
4903141421	2	65	1	0	1	0	1	2	1	0	0	1	2	0	0	1	4	1	0	10.3	68	0	1	2	1.15	2.97	0.84	1.57	6.8	5.3	0	0	1	0	1	0	3
4903141422	2	48	0	0	1	0	1	1	1	0	0	1	1	0	0	1	16	0	0	9.3	48	0	1	2	1.29	4.67	1.28	2.66	8.5	5.7	0	0	0	0	0	1	2
4904241421	2	32	1	1	1	0	1	2	1	1	0	1	1	1	0	3	0	1	1	22.3	53	1	2	4	1.12	2.78	1.01	1.38	12.8	6.7	0	0	1	0	1	1	1
4904241422	2	47	0	1	1	0	1	1	1	0	0	1	1	1	0	3	0	0	0	16.7	44	1	2	4	3.65	5.31	0.9	3.09	9.08664	4	1	1	1	0	1	1	2
4904241423	1	69	0	0	1	0	1	1	1	0	0	1	1	0	1	1	5	1	1	9.2	57	1	1	1	1.11	5.4	1.22	3.6	8	5.9	0	1	0	1	1	1	3
4904301421	1	54	0	1	1	0	1	1	1	0	0	1	1	0	1	1	3	1	0	10.6736	54	1	2	2	2.21502	4.75798	1.09624	2.64482	12.3	5.1	1	0	0	0	1	1	2
4904301422	1	48	0	0	1	0	1	1	1	0	0	1	1	0	0	3	10	1	0	23.5	66	1	1	1	1.08	3.36	1.09	1.88	14.7	9.9	0	0	0	0	0	1	2
4905111421	1	81	0	1	1	0	1	1	1	0	0	1	2	0	1	1	10	1	1	10.3	46	1	2	2	1.99	5.66	1.28	3.35	8.9	5.3	1	1	0	0	1	1	3
4905181421	1	54	0	0	1	0	1	1	1	0	0	1	1	0	0	3	7	1	0	20.6	34	1	2	2	1.25	3.97	0.99	2.5	14.1	4.6	0	0	1	0	1	1	2
4905241421	1	59	1	1	1	1	0	3	4	0	0	0	1	0	1	3	6	1	0	24.1	64	1	2	2	5.45	5.34	0.82	2.08	12.9	5.8	1	1	1	0	1	1	2
4906171422	1	71	1	1	1	0	1	2	1	0	0	1	1	0	0	1	6	1	1	5.2	82	1	1	1	1.08	4.8	1.48	2.55	10.8	8.3	0	0	0	0	0	1	3
4906171423	1	62	0	1	1	0	1	1	1	0	0	1	2	0	0	1	10	1	0	10.3	63	1	1	1	2.1	4.51	1.05	2.74	7.3	8.2	1	0	0	0	1	1	3
4906171427	1	64	0	1	1	0	1	1	1	0	0	1	2	0	1	1	1	0	0	7	67.6153	1	4.84314	4.84314	2.21502	4.75798	1.09624	2.64482	7.2	5.77802	1	0	0	0	1	1	3
4906231422	1	74	0	1	1	0	1	2	1	0	0	1	2	1	1	1	1	0	0	6.2	61	1	3	3	2.96	4.89	1.12	2.86	7	5.9	1	0	0	0	1	1	3
4906231423	1	81	0	1	0	0	1	1	1	0	0	1	2	0	1	1	4	1	1	7.2	75	1	10	10	4.56	4.48	0.67	2.11	7.7	7	1	0	1	0	1	1	3
4906231424	1	81	1	1	1	0	1	2	1	0	0	1	2	0	1	1	1	1	0	7.7	102	1	6	6	0.97	3.66	0.86	2.41	8.7	8.5	0	0	1	0	1	1	3
4906231425	3	78	1	1	1	0	1	2	1	0	1	1	1	1	1	1	0	0	0	5	100	0	6	18	2.51	4.38	0.62	2.63	7.4	5.4	1	0	1	0	1	1	3
4906231427	1	60	0	0	1	0	1	1	1	0	0	1	1	0	0	1	1	1	0	9.9	67.6153	1	2	2	2.21502	4.75798	1.09624	2.64482	9.2	5.77802	1	0	0	0	1	1	3
4906241411	2	62	0	1	1	0	1	2	2	0	0	1	1	0	1	1	10	1	1	10.3	63	0	3	6	2.1	4.51	1.05	2.74	7.3	8.2	1	0	0	0	1	1	3
4906241412	1	81	1	0	1	0	1	1	1	0	0	1	1	1	1	1	0	0	0	6.7	66	1	3	3	3.85	3.93	0.83	1.72	7.1	7.2	1	0	1	0	1	1	3
4906301411	1	44	0	1	1	0	1	1	3	0	0	1	1	0	1	1	5	1	0	10	302	1	1	1	0.66	3.77	1.07	2.41	8	9.9	0	0	0	0	0	1	1
4907081411	4	40	0	0	1	0	1	2	3	0	0	0	2	1	0	2	0	0	0	12.6	40	1	3	12	2.32	4.3	0.83	2.82	7.2	5	1	0	1	0	1	1	1
4907081421	1	51	0	0	1	0	1	1	1	0	0	1	1	0	0	3	10	1	1	18.2	63	1	2	2	2.11	4.59	0.97	2.74	11.3	4.8	1	0	1	0	1	1	2
4907081422	1	80	0	1	1	0	1	1	1	0	0	1	2	0	1	1	0	1	0	6.3	63	1	3	3	3.26	2.97	0.64	1.46	9.08664	4.1	1	0	1	0	1	1	3
4907081423	1	55	0	0	1	0	1	1	1	0	0	1	1	0	1	2	4	1	1	14.1	191	1	4	4	1.74	5.17	1.96	2.16	9.7	8.1	1	0	1	0	1	1	2
4907081424	1	52	1	1	1	0	1	2	1	0	0	1	1	0	0	2	13	1	0	15.5	56	1	4	4	1.9	4.64	0.95	3.26	10	4.8	1	0	1	0	1	1	2
4907081425	2	52	1	1	1	1	0	3	4	0	0	1	1	0	0	1	4	1	0	6.7	65	1	3	6	0.88	4	1.15	2.43	7.4	5.2	0	0	0	0	0	1	2
4907081426	1	46	1	1	1	1	1	3	1	0	0	1	1	1	0	1	0	1	0	7.7	69	1	2	2	3.93	3.54	0.64	1.06	9.08664	3.7	1	0	1	0	1	1	2
4907081427	1	74	0	1	1	0	1	1	1	0	0	1	2	0	1	1	2	1	0	6	62	1	3	3	1.57	4.82	1.22	2.97	7.9	8.1	0	0	0	0	0	1	3
4907081428	1	36	1	1	1	0	1	2	1	0	0	1	1	0	1	1	1	1	0	6	57	0	4	4	2.06	4.32	0.97	2.69	6.1	6.2	1	0	1	0	1	0	1
4907101411	2	65	0	0	1	0	1	1	2	0	0	1	1	0	0	2	5	1	0	12.4	31	0	2	4	0.97	2.69	1.24	0.94	10.4	7.2	0	0	0	0	0	1	3
4907101412	3	60	1	0	1	1	0	4	5	0	0	0	2	0	0	1	5	1	0	8.5	70	1	2	6	1.06	4.3	1.01	3.07	7.5	5.2	0	0	1	0	1	1	3
4907101413	1	62	0	0	1	0	1	1	3	0	0	0	2	0	0	1	5	1	0	5.3	62	0	2	2	1.56	4.02	1.1	2.3	7	4	0	0	0	0	0	1	3
4907101421	2	74	0	1	1	0	1	2	1	0	0	1	1	0	1	1	2	1	0	6	62	0	10	20	1.57	4.82	1.22	2.97	7.9	8.1	0	0	0	0	0	1	3
4907131421	1	76	1	1	1	0	1	1	1	0	0	1	1	0	1	1	0	0	1	7.5	183	1	8	8	3.73	4.16	0.79	2.22	6.1	7.8	1	0	1	0	1	0	3
4907141412	2	53	0	0	1	0	1	2	3	0	0	0	2	0	0	1	12	1	0	6.9	36	1	3	6	1.62	4.65	1.18	3.07	7.2	5.2	0	0	0	0	0	1	2
4907151413	2	64	1	1	1	0	1	2	3	1	0	1	2	0	1	1	10	0	0	7.5	61	0	3	6	0.96	3.37	0.8	2.11	7.4	4.8	0	0	1	0	1	1	3
4907151414	2	78	1	1	1	1	0	4	5	1	1	0	1	0	0	1	7	1	0	5.7	294	0	3	6	1.13	4.82	0.98	3.57	7.2	6.3	0	0	1	1	1	1	3
4907211415	3	45	1	1	1	1	0	4	5	1	1	0	1	0	0	2	5	1	0	15.4	72	1	4	12	4.83	5.8	1.02	2.8	11.1	7.1	1	1	1	0	1	1	2
4907211416	2	48	0	0	1	0	1	1	3	0	0	1	1	0	0	1	3	1	0	8.24	55	1	5	10	1.88	6.21	1.36	3.81	6.8	6.8	1	1	0	1	1	0	2
4907301421	2	70	0	0	1	0	1	1	1	0	0	1	2	1	0	1	0	0	0	7.2	59	0	8	16	1.93	5.36	0.63	4.41	8	3.4	1	1	1	1	1	1	3
4908101421	2	52	0	1	1	0	1	1	1	0	0	1	1	1	0	1	0	0	0	5.13	295	1	10	20	2.72	6.14	1.23	4.08	7.6	5.6	1	1	0	1	1	1	2
4908141412	2	17	1	0	0	1	0	3	3	0	0	0	3	0	0	3	0	1	0	33	44	0	6	12	3.32	3.52	0.71	2.36	12.5	4.1	1	0	1	0	1	1	1
4908221413	1	41	1	1	1	1	0	4	4	1	0	0	1	0	1	2	0	1	0	14.7	48	1	6	6	4.6	4.36	0.95	2.39	9.3	3	1	0	1	0	1	1	1
4908301419	1	74	0	1	1	1	0	4	4	0	0	1	1	0	1	1	20	0	0	11	64	0	5	5	2.32	6.6	1.5	4.35	8.3	8.6	1	1	0	1	1	1	3
4909011413	1	67	1	0	1	0	1	1	2	0	0	1	2	0	1	1	10	1	1	8.2	66	1	5	5	1.7	4.78	1.11	3.23	7.8	5.5	1	0	0	0	1	1	3
4909021411	1	71	1	1	1	0	1	3	2	0	0	1	1	0	0	1	5	1	0	5.2	82	1	6	6	1.08	4.8	1.48	2.55	10.8	8.3	0	0	0	0	0	1	3
4909051412	3	52	1	1	1	0	1	1	1	0	0	1	3	0	0	2	2	1	0	11.5	65	1	5	15	2.23	4.32	1.07	2.82	11.4	7.5	1	0	0	0	1	1	2
4909051413	3	30	1	0	1	0	1	3	2	0	0	0	1	0	0	2	6	1	0	15.2	42	1	4	12	1.1	3.15	1.18	1.59	11.4	6.4	0	0	0	0	0	1	1
4909071414	1	90	0	1	1	1	1	1	2	0	0	1	2	0	1	1	15	1	0	10.2	57	0	7	7	4.91	6.46	0.99	4.43	10.1	5.8	1	1	1	1	1	1	3
4909071415	1	71	1	0	1	0	1	1	1	1	0	1	2	0	1	3	10	1	0	55	343	0	5	5	1.56	3.34	1.14	1.45	12.8	9.9	0	0	0	0	0	1	3
4909131415	3	68	1	0	1	0	1	1	1	0	0	1	1	0	0	3	3	1	0	18.5	51	1	5	15	0.98	4.78	1.23	2.99	16	5.4	0	0	0	0	0	1	3
4909211416	1	73	0	0	1	0	1	1	1	0	0	1	2	0	1	1	5	1	0	6.6	49	0	6	6	2.6	5.78	1.39	3.83	6.2	6.3	1	1	0	1	1	0	3
4909211417	1	73	1	1	1	1	1	3	1	0	0	1	2	0	1	1	10	1	0	5.2	61	0	7	7	1.16	2.11	0.63	1.1	5.5	4	0	0	1	0	1	0	3
4909261421	2	57	1	1	1	1	0	4	4	0	1	0	1	1	1	1	0	1	0	9.7	58	1	3	6	0.57	4.66	1.57	2.89	6.9	5.2	0	0	1	0	1	0	2
4909271421	3	54	0	1	1	0	1	1	1	0	0	1	2	1	1	3	0	1	1	32.8	45	1	3	9	4.74	4.16	0.76	2.36	10.9	5.5	1	0	1	0	1	1	2
4910111421	1	60	0	0	1	0	1	1	1	0	0	1	2	0	1	2	1	0	0	11.2	52	1	4	4	1.59	4.15	0.88	2.82	6.8	5.4	0	0	1	0	1	0	3
4910111422	1	74	0	0	1	0	1	2	1	0	0	1	1	0	0	2	1	1	0	14.7	54	1	6	6	1.14	5	0.85	4.13	9.08664	5.3	0	0	1	1	1	1	3
4910111423	1	80	0	0	1	0	1	1	1	0	0	1	1	0	1	1	5	1	1	8.4	61	0	6	6	1.15	3.54	1.05	2.18	7	6.4	0	0	0	0	0	1	3
4910201421	1	74	0	1	1	1	0	3	3	0	0	1	2	0	1	1	26	1	0	9.7	73	1	4	4	2	4.02	1.33	2.03	8.2	9	1	0	0	0	1	1	3
4910281421	1	70	0	0	1	1	0	3	3	0	0	1	2	0	1	1	3	1	0	8.4	43	1	4	4	2.19	5.59	1.33	3.81	2.5	3.3	1	1	0	1	1	0	3
4911011421	1	40	0	1	1	0	1	1	1	0	0	1	1	0	0	1	3	1	0	7.7	44	1	3	3	1.09	4.46	1.23	2.93	8.4	4.9	0	0	0	0	0	1	1
4911011422	1	57	0	0	1	0	1	1	1	0	0	1	1	1	1	2	0	1	0	13.3	43	1	3	3	4.44	5.21	0.93	3.04	6.6	5	1	1	1	0	1	0	2
4911011423	2	74	0	0	1	0	1	2	1	0	0	1	2	0	1	1	2	1	0	5.9	48	1	4	8	2	5.91	1.2	4.24	6.3	3.6	1	1	0	1	1	0	3
4911081421	2	52	0	0	1	0	1	1	1	0	0	1	2	0	0	1	10	1	0	10.3	43	1	4	8	2.36	4.61	0.94	3.2	9.6	3.8	1	0	1	0	1	1	2
4911081422	1	64	0	1	1	0	1	2	1	0	0	1	2	0	1	2	7	1	1	11.7	36	1	6	6	1.81	5.07	0.88	3.99	14.4	5.3	1	0	1	1	1	1	3
5301031491	3	60	1	0	1	1	0	4	3	0	0	1	3	0	1	1	5	1	1	7.65	72	0	3	9	1.3	2.56	1.16	0.81	6.73	5.33	0	0	0	0	0	0	3
5301071481	#NULL!	#NULL!	#NULL!	#NULL!	#NULL!	#NULL!	#NULL!	#NULL!	#NULL!	#NULL!	#NULL!	#NULL!	#NULL!	#NULL!	#NULL!	#NULL!	#NULL!	#NULL!	#NULL!	#NULL!	#NULL!	#NULL!	#NULL!	#NULL!	#NULL!	#NULL!	#NULL!	#NULL!	#NULL!	#NULL!	#NULL!	#NULL!	#NULL!	#NULL!	#NULL!	1	3
5301071482	#NULL!	56	1	0	1	0	0	3	4	0	1	1	1	0	1	1	22	1	1	7.16	65	0	5	#NULL!	5.85	4.44	1.16	0.62	6.88	4.81	1	0	0	0	1	0	2
5301071489	1	63	1	1	1	1	0	3	3	1	1	1	1	0	0	1	4	1	0	8.39	76	0	12	12	1.36	3.54	0.97	1.95	6.72	6.55	0	0	1	0	1	0	3
5301101471	2	66	0	1	1	0	1	1	1	0	0	1	3	1	1	3	0	1	0	18.13	45	0	15	30	2.57	6.07	1.01	3.89	15.86	2.06	1	1	1	1	1	1	3
5301101521	1	57	1	1	1	0	0	3	4	1	1	0	3	0	1	2	8	1	1	12.57	59	1	7	7	1.87	5.97	1.16	3.96	9.03	5.04	1	1	0	1	1	1	2
5301111511	1	68	0	1	1	0	1	1	1	0	0	0	1	0	1	1	20	1	1	10.73	63	1	4.84314	4.84314	1.43	4.03	1.23	2.15	9.08664	4.42	0	0	0	0	0	1	3
5301131481	1	60	0	0	1	0	1	1	1	0	0	0	2	0	1	2	12	1	0	12.33	41	0	4	4	1.14	4.67	1.21	2.94	11.72	5.61	0	0	0	0	0	1	3
5301141511	3	45	1	1	1	0	1	3	4	0	0	0	2	1	0	2	0	1	1	14.84	59	1	2	6	2.09	3.83	1.05	1.83	12.77	3.76	1	0	0	0	1	1	2
5301151481	3	55	1	1	1	1	0	4	4	1	1	0	2	0	1	1	12	1	0	9.28	59	0	8	24	0.49	2.11	1.17	0.72	10.37	6.68	0	0	0	0	0	1	2
5301161471	1	83	1	1	1	1	0	3	4	0	1	0	2	1	0	1	0	1	0	6.84	70	1	6	6	1.32	4.19	1.17	2.42	9.08664	4.58	0	0	0	0	0	1	3
5301161511	4	51	1	1	1	0	1	3	5	1	0	0	1	0	1	1	8	1	1	7.96	56	1	8	32	0.85	3.57	1.17	2.01	9.08664	6.35	0	0	0	0	0	1	2
5301201521	1	45	0	0	1	0	1	1	3	0	0	0	1	0	1	1	10	1	1	10.44	32	1	4	4	1.46	3.68	0.64	2.38	12.05	1.38	0	0	1	0	1	1	2
5301261511	2	53	0	1	1	1	0	2	2	0	0	1	1	0	1	3	16	1	1	21.2	62	1	10	20	1.82	6.2	0.95	4.42	15.66	7.49	1	1	1	1	1	1	2
5302121521	1	69	1	0	1	0	1	2	2	0	0	0	3	0	1	1	13	1	1	8.65	57	1	4	4	1.14	3.5	1.01	1.97	6.44	8.3	0	0	1	0	1	0	3
5302241511	1	71	0	1	0	0	1	1	1	0	0	1	2	0	1	2	19	1	1	13.45	50	1	4	4	1.37	5.27	1.62	3.03	9.12	6.92	0	1	1	0	1	1	3
5302251481	4	41	1	0	1	0	1	3	2	0	0	0	1	1	0	1	0	1	0	8.93	67	1	2	8	1.19	4.59	1.16	2.89	10.95	4.72	0	0	0	0	0	1	1
5302261511	2	75	0	1	0	0	1	2	5	0	0	0	3	0	1	1	10	1	1	4.7	65	0	8	16	1.44	4.75	1.33	2.77	4.81	5.79	0	0	0	0	0	0	3
5302271471	4	78	1	1	1	1	0	3	4	1	1	1	2	0	1	2	2	1	0	13.44	88	1	3	12	3.75	2.86	1.07	0.09	9.06	8.08	1	0	0	0	1	1	3
5302281481	4	65	0	1	1	0	1	2	2	0	0	0	3	1	1	3	1	1	1	20.24	77	1	2	8	2.35	6.61	1.24	4.3	7.85	7.35	1	1	0	1	1	1	3
5303021481	3	74	0	1	1	0	1	2	2	0	0	0	1	0	1	2	30	1	1	12.03	39	0	3	9	1.24	4.27	1.22	2.68	11.9	4.77	0	0	0	0	0	1	3
5303021491	3	57	0	1	1	0	1	2	3	0	0	0	1	0	1	2	5	1	1	15.33	42	0	2	6	1.31	3.57	1.29	1.68	9.5	3.91	0	0	0	0	0	1	2
5303051511	4	60	1	1	1	1	0	4	4	1	1	0	1	0	1	2	1	1	1	15.44	53	0	4	16	1.24	4.5	1.29	2.48	14.03	7.16	0	0	0	0	0	1	3
5303111481	4	58	1	0	1	0	1	2	2	0	0	1	2	0	0	3	10	1	1	18.2	53	1	3	12	2.21502	4.75798	1.09624	2.64482	11.66	6.8	1	0	0	0	1	1	2
5303111491	4	55	0	1	1	1	1	2	3	0	0	0	1	1	1	1	0	0	0	8.5	67.6153	0	2	8	2.21502	4.75798	1.09624	2.64482	9.08664	5.77802	1	0	0	0	1	1	2
5303121521	1	52	1	1	1	0	1	2	2	1	1	0	1	0	1	2	4	0	1	12.08	48	1	5	5	0.94	1.86	0.6	1.15	12.07	4.22	0	0	1	0	1	1	2
5303131481	2	65	1	1	1	1	0	3	2	0	0	1	1	0	1	1	17	1	1	4.79	74	0	8	16	2.68	3.74	1.16	2.29	5.14	4.96	1	0	0	0	1	0	3
5303141521	2	55	0	0	1	0	1	2	2	0	0	0	3	1	1	1	0	1	1	7.38	46	1	2	4	1.81	3.19	0.95	2.28	6.54	3.89	1	0	1	0	1	0	2
5303161481	4	59	1	0	1	0	0	4	4	0	0	1	2	0	1	1	4	0	0	10.21	75	1	5	20	1.49	2.7	1.16	1.47	5.2	8.46	0	0	0	0	0	0	2
5303181511	#NULL!	59	1	0	1	0	1	3	2	0	0	0	2	0	0	3	7	1	1	17.12	44	1	4.84314	#NULL!	0.87	2.61	0.94	1.93	8.79	5.06	0	0	1	0	1	1	2
5303181521	3	67	0	1	1	0	1	2	2	0	0	0	1	0	0	2	12	0	1	13.83	53	1	4	12	1.07	4.45	1.3	3.25	10.9	4.47	0	0	0	0	0	1	3
5303191491	1	75	0	1	0	0	1	1	1	0	0	1	2	0	0	1	6	1	1	6.63	41	1	8	8	2.2	4.54	1.29	3.17	6.52	4.23	1	0	0	0	1	0	3
5303201521	1	73	0	1	1	0	1	2	2	0	0	0	1	0	1	1	16	1	1	6.01	58	1	3	3	2.77	2.21	0.86	0.88	5.8	6.94	1	0	1	0	1	0	3
5303201522	2	67	0	1	1	0	1	2	1	0	0	0	1	0	1	1	9	1	1	10.53	76	1	2	4	2.09	3.9	1.23	2.03	9.08664	6.4	1	0	0	0	1	1	3
5303211511	1	67	0	0	1	1	0	1	4	0	0	1	3	0	1	1	6	1	1	7.79	46	0	4.84314	4.84314	1.42	3.16	0.97	2.21	11.57	5.83	0	0	1	0	1	1	3
5303211512	3	64	0	1	0	0	1	1	2	0	0	1	2	0	1	1	4	1	1	9.66	31	1	4.84314	14.5294	1.5	3.78	1.09	2.75	7.56	7.23	0	0	0	0	0	1	3
5303231511	1	84	0	1	0	0	1	1	1	0	0	1	1	0	1	1	3	1	0	8.22	76	0	8	8	1.02	2.93	1.29	1.61	9.08664	5.29	0	0	0	0	0	1	3
5303241491	3	74	0	1	1	1	1	2	2	0	0	0	3	0	1	2	5	0	1	13.6	41	0	2	6	1.58	5.16	1.11	4.15	11.81	2.79	0	0	0	1	1	1	3
5303251521	1	71	1	1	1	0	1	2	2	1	1	0	3	0	1	3	2	1	1	24.84	100	1	3	3	1.35	2.74	1.02	1.83	11.17	7.88	0	0	1	0	1	1	3
5303281521	3	52	1	0	1	0	1	3	4	1	0	0	1	0	1	2	14	1	1	16.12	51	1	3	9	0.95	3.21	0.99	2.19	14.57	6.14	0	0	1	0	1	1	2
5303311491	2	63	0	0	0	0	1	1	2	0	0	1	2	0	0	1	10	1	1	6.69	45	0	2	4	0.82	4.76	2.09	2.48	5.91	6.85	0	0	1	0	1	0	3
5304021491	3	49	0	0	1	0	1	1	1	0	0	0	2	0	0	1	10	1	1	9.42	47	0	1	3	1.57	4.07	1.01	2.99	7.24	3.18	0	0	1	0	1	1	2
5304021492	3	61	1	0	1	1	1	2	3	0	0	0	3	0	1	3	5	1	1	21.14	69	0	2	6	2.23	4.04	0.99	2.86	14.97	6.59	1	0	1	0	1	1	3
5304041491	2	63	0	0	1	1	1	2	2	0	0	0	3	0	1	1	2	1	1	8.13	53	0	4	8	1.31	4.33	1	3.37	5.63	5.58	0	0	1	1	1	0	3
5304071511	1	72	0	0	1	0	1	1	2	0	0	1	2	0	1	2	10	1	1	11.27	45	0	4.84314	4.84314	1.83	4.41	0.92	3.19	8.02	3.53	1	0	1	0	1	1	3
5304071512	3	64	0	1	1	1	1	3	3	0	0	0	2	0	1	1	3	1	0	5.88	68	0	2	6	1.61	4.83	1.11	3.72	4.88	5.38	0	0	0	1	1	0	3
5304091491	4	66	1	0	1	0	1	1	2	0	0	1	2	0	1	2	2	1	1	15.1	85	1	4	16	2.9	4.28	0.96	2.88	8.82	7.82	1	0	1	0	1	1	3
5304101481	1	47	1	0	1	0	1	2	3	0	0	1	1	0	0	1	8	1	1	6.31	71	1	6	6	2.09	3.76	1.02	2.5	10.51	4.9	1	0	1	0	1	1	2
5304101492	3	60	0	0	1	1	1	2	2	0	0	0	1	0	1	1	10	1	1	6.44	87	0	3	9	2.87	4.43	1.21	2.38	8.67	9.9	1	0	0	0	1	1	3
5304101511	2	68	0	0	1	0	1	1	2	0	0	0	1	0	1	3	9	1	0	16.84	52	1	5	10	0.96	4.82	1.51	3.33	12.4	6.57	0	0	0	0	0	1	3
5304111481	#NULL!	#NULL!	#NULL!	#NULL!	#NULL!	#NULL!	#NULL!	#NULL!	#NULL!	#NULL!	#NULL!	#NULL!	#NULL!	#NULL!	#NULL!	#NULL!	#NULL!	#NULL!	#NULL!	#NULL!	#NULL!	#NULL!	#NULL!	#NULL!	#NULL!	#NULL!	#NULL!	#NULL!	#NULL!	#NULL!	#NULL!	#NULL!	#NULL!	#NULL!	#NULL!	1	3
5304131511	1	73	1	0	1	0	1	1	1	0	0	1	2	0	1	2	20	1	1	15.28	69	1	4.84314	4.84314	0.99	2.77	1.16	1.43	13.36	6.67	0	0	0	0	0	1	3
5304161511	1	53	0	1	1	0	1	1	2	0	0	1	3	0	1	3	10	1	1	20.02	166	1	4.84314	4.84314	0.9	5.11	1.43	3.79	10.1	4.57	0	0	0	1	1	1	2
5304171521	1	78	1	0	1	1	0	3	5	0	0	0	2	0	1	1	20	0	1	6.04	96	1	8	8	1.63	4.03	0.65	3	10.76	8.17	0	0	1	0	1	1	3
5304171529	1	71	1	0	1	0	1	2	2	1	1	0	1	0	1	3	20	1	1	18.63	165	1	3	3	0.91	3.34	0.85	2.25	10.49	9.9	0	0	1	0	1	1	3
5304211521	4	61	1	1	1	0	1	2	2	1	1	1	2	0	0	2	4	1	1	14.39	56	0	8	32	0.59	3.76	1.45	2.36	9.4	4.21	0	0	0	0	0	1	3
5304241511	4	61	0	1	1	0	1	3	1	0	0	0	2	0	1	1	6	1	1	9.53	51	1	1	4	3.17	4.73	1.03	3.14	7.14	3.66	1	0	1	0	1	1	3
5304241521	2	75	1	1	1	0	1	3	5	0	0	0	1	0	1	3	20	1	1	19.8	140	0	7	14	2.35	5.52	0.99	4.15	9.08664	9.85	1	1	1	1	1	1	3
5304281511	2	57	1	1	1	1	1	2	3	0	0	0	2	0	0	1	7	1	1	9.5	50	0	2	4	1.6	4.41	1.34	3.05	6.47	4.49	0	0	0	0	0	0	2
5305051521	3	40	1	0	1	0	1	2	5	0	0	1	1	0	0	3	1	1	1	19.68	56	1	5	15	1.41	4.06	0.98	2.99	13.07	6.12	0	0	1	0	1	1	1
5305061481	4	64	0	1	1	0	1	1	3	0	0	1	1	0	1	1	2	1	1	6.79	60	1	2	8	1.19	4	0.89	3.18	6.39	2.85	0	0	1	0	1	0	3
5305061482	2	76	0	1	1	0	1	2	1	0	0	1	1	0	1	3	10	1	1	18.94	75	0	8	16	1.98	2.93	0.87	1.42	10.74	9.9	1	0	1	0	1	1	3
5305071521	1	66	0	1	1	0	1	1	1	0	0	0	2	0	1	1	6	1	1	8.36	69	1	2	2	5.34	5.03	0.75	1.81	5.93	7.51	1	0	1	0	1	0	3
5305081481	4	63	1	1	1	1	1	3	3	0	0	0	3	0	1	1	3	1	1	6.81	84	1	3	12	2.33	5.12	0.85	3.93	6.91	4.97	1	0	1	1	1	1	3
5305091521	1	71	1	1	1	1	0	3	3	1	1	0	1	0	1	2	12	1	1	14.09	66	1	2	2	1.76	3.72	0.93	2.41	9.31	4.82	1	0	1	0	1	1	3
5305111521	1	62	1	1	0	0	1	2	1	0	0	1	2	0	1	2	7	1	1	14.88	54	1	3	3	1.18	3.87	1.11	3.02	10.69	5.95	0	0	0	0	0	1	3
5305111522	1	68	0	1	1	0	1	2	1	0	0	1	1	0	1	1	11	1	1	3.76	72	1	4	4	0.69	4.53	1.18	3.61	8.42	6.79	0	0	0	1	1	1	3
5305121481	4	69	1	1	1	0	1	1	1	1	1	0	1	0	1	1	10	1	1	7.2	65	1	2	8	0.67	3.13	1.27	1.72	9.8	5.94	0	0	0	0	0	1	3
5305121488	2	60	1	1	1	0	0	2	1	1	0	1	1	0	0	1	10	1	0	8.43	57	0	8	16	0.86	3.22	1.1	2.2	11.07	5.78	0	0	0	0	0	1	3
5305121511	#NULL!	58	1	1	1	1	0	3	3	1	1	1	2	0	1	1	9	1	1	8.91	64	1	4.84314	#NULL!	2.39	5.62	1.57	3.41	8.3	4.79	1	1	1	1	1	1	2
5305131511	2	55	1	1	1	1	0	4	3	0	0	0	3	0	0	1	1	1	0	8.35	54	0	2	4	3.17	5.63	1.07	3.83	6.5	3.76	1	1	0	1	1	0	2
5305131521	2	53	1	0	1	0	1	1	3	1	0	1	2	0	0	2	12	1	1	11.23	67	1	3	6	1.91	4.77	1.2	3.04	8.6	6.51	1	0	0	0	1	1	2
5305131529	3	68	1	1	1	0	1	1	2	0	0	1	1	0	1	2	1	1	1	13.15	85	1	2	6	1.03	3.76	1.16	2.6	10.6	9.9	0	0	0	0	0	1	3
5305141481	3	68	1	1	1	1	0	4	5	0	0	0	3	0	1	1	4	1	1	7.02	98	1	3	9	1.06	2.41	1.16	1.1	6	3.78	0	0	0	0	0	0	3
5305191491	3	64	1	1	1	1	1	2	2	0	0	0	1	0	0	2	2	1	1	12.28	53	0	3	9	1.29	3.46	0.82	2.61	9.81	5.25	0	0	1	0	1	1	3
5305191499	3	68	1	1	1	0	0	2	2	0	0	0	1	0	1	2	6	1	1	12.02	46	0	2	6	2.07	2.87	0.99	1.62	8.78	5.85	1	0	1	0	1	1	3
5305211481	3	69	1	1	1	0	1	2	4	1	0	0	2	0	1	2	5	1	1	13.87	80	1	2	6	3.59	3.81	0.71	1.9	9.23	7.47	1	0	1	0	1	1	3
5305281511	1	78	1	0	1	0	1	1	2	0	0	1	1	0	1	2	6	1	1	15.81	52	0	4.84314	4.84314	0.82	3.27	1.01	1.92	8.9	5.91	0	0	1	0	1	1	3
5305281521	2	64	1	0	1	0	1	1	5	0	0	0	1	0	1	1	3	1	1	5.17	76	1	6	12	1.18	2.06	0.61	1.33	3.4	6.43	0	0	1	0	1	0	3
5306011481	#NULL!	75	1	1	1	0	1	1	1	0	0	1	1	0	1	3	11	1	0	17.18	56	0	8	#NULL!	0.79	3	1.38	1.41	11.02	8.49	0	0	0	0	0	1	3
5306011521	3	64	1	0	1	0	1	2	3	0	0	0	1	0	0	2	0	1	1	14.42	58	1	3	9	1.12	3.85	1.16	2.24	10.75	9.9	0	0	0	0	0	1	3
5306021481	3	34	0	1	1	1	0	4	5	0	0	0	1	0	0	1	2	1	0	9.46	45	1	8	24	1.52	4.58	1.07	3.21	7.12	3.68	0	0	0	0	0	1	1
5306021521	2	62	1	1	1	0	1	2	3	0	0	1	1	0	0	1	8	1	1	4.58	55	0	5	10	0.42	4.71	1.92	2.42	6.2	5.5	0	0	1	0	1	0	3
5306031481	2	73	0	1	1	0	1	2	1	0	0	1	1	0	1	1	17	1	0	9.57	60	0	8	16	4.41	5.61	1.06	2.32	8.63	5.9	1	1	0	0	1	1	3
5306041481	2	55	1	0	1	1	0	3	2	0	0	1	2	1	1	1	0	1	1	7.51	60	0	8	16	1.31	5.31	1.18	3.77	11.58	5.67	0	1	0	1	1	1	2
5306081521	2	54	1	1	1	0	1	3	4	0	0	0	2	0	1	2	2	1	1	15.49	47	1	5	10	2.34	3.81	0.85	2.04	8.38	6.25	1	0	1	0	1	1	2
5306111481	2	34	1	0	1	0	0	2	1	0	0	1	1	0	0	2	3	1	1	15.75	49	0	8	16	3.25	7.05	0.89	4.8	9.08664	4.78	1	1	1	1	1	1	1
5306131521	2	65	0	0	1	0	1	1	2	0	0	1	1	0	1	3	4	1	1	17.39	56	1	2	4	2.03	3.48	1.07	2.97	9.81	5.54	1	0	0	0	1	1	3
5306231521	2	60	0	0	1	0	1	2	1	0	0	1	3	0	1	1	6	1	1	7.57	52	1	2	4	2.64	5.87	1.27	3.83	8.03	8.84	1	1	0	1	1	1	3
5306281511	1	68	0	1	1	1	1	1	2	0	0	1	1	0	0	1	21	1	1	7.3	64	1	5	5	1	3.13	0.99	1.83	7.9	4.56	0	0	1	0	1	1	3
5306291521	2	73	0	1	1	1	1	1	1	0	0	1	1	0	1	1	10	1	1	5.88	78	1	2	4	1.46	3.98	1.29	2.35	6.06	8.63	0	0	0	0	0	0	3
5307021511	1	63	1	1	1	0	1	1	1	0	0	1	2	0	1	2	13	0	1	12.06	62	1	4.84314	4.84314	1.06	3.84	1.16	2.3	6.9	6.09	0	0	0	0	0	0	3
5307061521	1	52	1	0	1	0	1	2	3	1	1	0	1	0	0	2	7	1	1	15.14	49	1	2	2	0.69	3.23	0.96	2.26	4.38	6.31	0	0	1	0	1	0	2
5307061529	3	75	0	1	1	0	1	2	2	0	0	1	3	1	1	1	0	1	0	8.98	56	1	3	9	1.62	4.33	1.29	2.88	8.53	6.7	0	0	0	0	0	1	3
5307081511	1	63	0	1	1	1	1	1	2	0	0	1	2	0	1	1	7	1	0	7.87	36	1	4.84314	4.84314	0.74	2.32	0.96	0.99	6.4	4.78	0	0	1	0	1	0	3
5307191511	1	81	0	1	1	1	1	1	2	0	0	0	2	0	1	1	6	1	1	9.18	117	0	4.84314	4.84314	0.83	3.41	1.06	2.23	7.8	9.9	0	0	0	0	0	1	3
5307291521	4	47	0	0	1	0	1	2	3	0	0	0	1	0	1	1	1	0	1	10.2	77	1	3	12	0.47	2.94	0.95	2.29	11.3	5.84	0	0	1	0	1	1	2
5308051521	2	48	1	1	1	1	0	4	5	0	1	0	1	1	1	1	0	0	1	9.88	71	0	8	16	1	3.93	0.77	3.03	11.7	5.03	0	0	1	0	1	1	2
5308071511	2	56	0	1	1	1	0	4	4	0	0	0	2	0	1	1	5	1	1	7.1	60	1	8	16	1.51	3.75	1.1	2.25	7.6	6.29	0	0	0	0	0	1	2
5308131511	4	68	1	0	1	0	1	1	4	0	0	1	2	0	1	2	0	0	1	16.59	76	1	5	20	0.87	2.18	0.69	1.31	12.1	5.25	0	0	1	0	1	1	3
5308251521	2	57	1	1	1	1	0	3	4	0	0	0	1	0	1	2	2	0	1	12.16	60	1	2	4	3.25	2.72	0.71	0.95	13.3	6.17	1	0	1	0	1	1	2
5308261481	1	77	0	0	1	0	1	1	2	0	0	0	1	0	1	1	1	1	1	8.06	272	1	3	3	2.08	4.87	0.95	3.28	9.3	5.02	1	0	1	0	1	1	3
5309041511	1	67	0	0	1	1	0	1	2	0	0	1	2	0	1	2	10	1	1	11.4	48	0	3	3	0.85	3.24	0.86	2.12	11.2	5.38	0	0	1	0	1	1	3
5309071481	4	70	0	0	1	1	1	2	2	0	0	0	1	0	1	3	0	1	1	17.43	60	1	2	8	3.88	4.33	1.29	1.78	11.6	9.79	1	0	0	0	1	1	3
5309071511	1	57	0	1	1	1	1	3	5	0	0	1	1	1	0	1	0	1	1	8.62	44	0	2	2	1.94	5.34	0.89	4.05	7.9	5.24	1	1	1	1	1	1	2
5309141481	4	59	0	1	0	0	1	1	3	0	0	0	3	0	1	2	8	1	1	11.4	36	1	3	12	1.79	5.23	1.48	3.24	10.9	5.18	1	1	0	0	1	1	2
5309161521	3	65	0	0	1	0	1	1	4	0	0	1	2	0	1	1	4	1	1	6.88	53	1	4	12	2.59	5.54	1.13	3.71	5.8	7.75	1	1	0	1	1	0	3
5309251521	2	66	1	1	1	1	1	1	3	0	0	0	2	0	1	1	1	1	0	9.16	95	0	8	16	1.53	3.68	1.04	2.28	8.5	5.11	0	0	0	0	0	1	3
5309261511	1	74	1	0	1	0	1	1	1	0	0	1	1	0	1	2	2	1	1	16.45	70	0	4.84314	4.84314	1.04	4.5	0.88	3.21	10.4	7.53	0	0	1	0	1	1	3
5309281481	4	55	0	0	1	0	1	2	4	0	0	0	3	0	1	1	2	0	1	9.06	49	1	3	12	0.64	3.26	0.91	2.2	11.3	6.46	0	0	1	0	1	1	2
5309291511	2	83	0	1	1	1	1	3	3	0	0	0	2	0	1	1	23	1	1	9.23	84	1	5	10	4.2	5.6	0.89	3.13	8.6	7.79	1	1	1	0	1	1	3
5310041511	3	55	0	0	1	0	1	2	2	0	0	1	2	0	0	1	3	1	1	9.06	49	0	2	6	0.64	3.26	0.91	2.2	9.2	6.46	0	0	1	0	1	1	2
5310041512	1	74	1	0	1	0	1	3	1	0	0	0	1	0	0	2	2	1	1	16.45	70	0	2	2	1.04	4.5	0.88	3.21	10.4	7.53	0	0	1	0	1	1	3
5310041513	3	65	1	1	1	1	0	4	3	0	0	1	2	0	0	1	5	1	1	6.78	100	0	2	6	1.73	5.35	0.83	3.96	9.08664	5.43	1	1	1	1	1	1	3
5310131511	2	42	1	1	1	0	1	2	1	0	0	0	1	0	0	1	2	1	1	6.42	61	0	2	4	0.58	3.22	0.96	2.29	9.7	4.77	0	0	1	0	1	1	1
5310141511	2	58	1	1	1	0	1	2	2	1	0	0	2	1	1	2	0	1	1	13.76	65	0	3	6	2.31	5.22	0.86	3.94	9.3	4.45	1	1	1	1	1	1	2
5310141512	2	58	1	1	1	0	1	2	2	0	0	0	3	0	1	2	8	1	1	12.08	122	0	2	4	1.27	2.64	0.95	1.32	9.2	6.28	0	0	1	0	1	1	2
5310151511	2	71	0	1	1	0	1	2	1	0	0	1	2	0	1	1	10	1	1	8.59	53	0	2	4	1.44	3.41	1.46	1.5	8.5	6.97	0	0	0	0	0	1	3
5310151512	2	42	1	0	1	0	1	2	2	0	0	0	1	0	0	1	0	1	1	7.13	68	0	3	6	1.79	3.93	1.06	2.41	6.3	6.68	1	0	0	0	1	0	1
5310161511	2	44	1	0	1	0	1	2	1	0	0	0	2	0	1	1	10	1	1	6.62	76	0	3	6	0.98	3.32	1.06	2.22	5.7	3.95	0	0	0	0	0	0	1
5310171511	2	35	1	1	1	0	1	2	2	1	0	0	2	1	0	2	0	0	0	11.14	53	0	2	4	3.12	4.46	1.07	2.33	7.8	5.89	1	0	0	0	1	1	1
5310181511	2	58	0	1	1	0	0	2	2	0	0	1	2	0	1	2	1	1	1	11.8	47	0	2	4	1.04	4.28	1.44	2.55	10.6	7.15	0	0	0	0	0	1	2
5310201511	2	71	0	1	1	0	1	2	2	0	0	0	2	0	1	1	10	1	1	8.59	53	0	2	4	1.44	3.41	1.56	1.5	8.5	6.97	0	0	1	0	1	1	3
5311021511	1	56	0	1	1	0	1	2	2	0	0	1	1	0	0	1	5	1	1	6.75	47	1	1	1	1.8	4.68	1.24	2.72	5.9	4.02	1	0	0	0	1	0	2
5311031511	4	66	0	1	0	1	0	1	4	0	0	1	2	0	1	1	4	1	1	8.34	44	1	1	4	1.24	3.79	1.21	2.02	10.1	7.5	0	0	0	0	0	1	3
5311041511	1	66	0	1	0	1	1	1	1	1	0	0	1	0	1	1	2	1	1	4.78	66	0	3	3	1.51	4.27	0.97	3.09	5.3	7.09	0	0	1	0	1	0	3
5311051511	4	66	0	0	1	0	1	1	1	0	0	1	1	0	0	1	2	1	1	8.4	44	1	1	4	6.83	4.95	0.86	1.82	9.5	8.87	1	0	1	0	1	1	3
5312111471	4	66	1	1	1	1	0	2	2	1	1	1	2	0	0	1	14	1	1	5.7	75	0	5	20	1.96	3.12	0.95	1.28	7.97	3.19	1	0	1	0	1	1	3
5312121481	1	69	0	0	1	0	1	1	1	0	0	1	2	0	1	1	3	1	1	6.28	60	0	6	6	2.69	3.97	1.3	1.45	6.27	5.62	1	0	0	0	1	0	3
5312121491	1	51	1	1	1	1	0	2	4	1	1	1	2	0	1	1	11	1	1	6.56	77	0	8	8	5.15	4.54	1.06	1.14	6.56	6.05	1	0	0	0	1	0	2
5312121492	4	63	0	1	1	0	1	2	3	0	0	1	1	0	0	1	12	1	1	8.97	48	1	2	8	1.31	3.67	1.11	1.96	8.71	5.07	0	0	0	0	0	1	3
5312191481	4	52	1	1	1	1	0	4	3	1	1	0	2	0	1	1	8	1	0	6.33	66	1	5	20	1.73	3.58	1.35	1.44	6.04	5.43	1	0	0	0	1	0	2
5312211491	1	64	1	1	1	0	1	2	2	0	1	1	2	0	1	1	8	1	1	7.62	76	1	4	4	1.18	2.67	1.16	0.97	6.72	4.26	0	0	0	0	0	0	3
5312261481	1	69	0	0	0	0	1	1	1	0	0	0	3	0	1	2	6	1	0	12.17	55	1	5	5	3.89	3.76	1.12	0.87	11.26	7.17	1	0	0	0	1	1	3
5312261482	4	63	0	0	1	1	0	2	2	0	0	0	2	0	0	1	8	1	1	8.17	35	1	8	32	1.3	3.8	1.29	1.92	7.51	4.17	0	0	0	0	0	1	3
5510281511	1	76	0	1	1	0	1	1	1	0	0	1	1	0	1	3	11	1	1	27.2	67.6153	1	1	1	2.21502	4.75798	1.09624	2.64482	11.6	5.77802	1	0	0	0	1	1	3
